# Supplementary material for: Seaweed as a Natural Source against Phytopathogenic Bacteria
Source: MDPI journal article supplement (doi:10.3390/md21010023), 2022-12-28
Supplement: s1 [file s1]

## Supplementary material

### **Antibacterial activity/potential of macroalgae extracts against phytopathogenic bacteria and/or related to plant pathogenicity**

In the following pages, it will be presented all the information about macroalgae extracts/dry powder with the potential to inhibit phytopathogenic bacteria or related species. The data is organized in sections, and it was organized by methodologies.

**Note:** All the data information in the supplementary material I were retrieved from the SCOPUS database using the following search: “Antibacteria\* AND (Plant\* OR crop\* OR agricultur\* OR veget\* OR phytopatho\*) AND (Macroalga\* OR seaweed)”.

**Table S1.** Detailed information of antibacterial activity reported form disc/well diffusion technique.

| Disc/well diffusion technique    |                                                       |                    |                       |                                                                        |                                                |                                         |                                    |                                                           |           |
|----------------------------------|-------------------------------------------------------|--------------------|-----------------------|------------------------------------------------------------------------|------------------------------------------------|-----------------------------------------|------------------------------------|-----------------------------------------------------------|-----------|
| Phytopathogenic bacteria         | Macroalgae source                                     | Extraction solvent | Collection conditions | Composition of the extract                                             | Possible composition (comparative information) | Extract concentration/ volume (extract) | Inhibition halo (diameter_mm) /(%) | Notes                                                     | Reference |
| <i>Agrobacterium tumefaciens</i> | <i>Cystoseira humilis</i> var. <i>myriophylloides</i> | Methanol           | -                     | -                                                                      | -                                              | Soaked in ASE at 1.5%                   | >30 mm                             | -                                                         | [1]       |
|                                  | <i>Laminaria digitata</i>                             | Methanol           | -                     | -                                                                      | -                                              | Soaked in ASE at 1.5%                   | >30 mm                             | -                                                         | [1]       |
| <i>Bacillus subtilis</i>         | <i>Aglaothamnion sepositum</i>                        | Dry powder         | Spring                | -                                                                      | -                                              | Disc thallus                            | 1,5 mm                             | -                                                         | [2]       |
|                                  |                                                       | Dry powder         | Summer                | -                                                                      | -                                              | Disc thallus                            | 1 mm                               | -                                                         | [2]       |
|                                  |                                                       | Dry powder         | Autumn                | -                                                                      | -                                              | Disc thallus                            | 1,5 mm                             | -                                                         | [2]       |
|                                  |                                                       | Dry powder         | Winter                | -                                                                      | -                                              | Disc thallus                            | 1 mm                               | -                                                         | [2]       |
|                                  | <i>Alaria esculenta</i>                               | Dry powder         | Summer                | -                                                                      | -                                              | Disc thallus                            | 2 mm                               | -                                                         | [2]       |
|                                  |                                                       | Dry powder         | Autumn                | -                                                                      | -                                              | Disc thallus                            | 3 mm                               | -                                                         | [2]       |
|                                  | <i>Anthophycus longifolius</i>                        | Benzene            | -                     | Proteins and amino acids, phenolic compounds, alkaloids, carbohydrates | -                                              | "Standard concentration"                | 16.23±0.145 mm                     | Zones greater than 10 mm are considered positive results. | [3]       |
|                                  |                                                       | Acetic acid        | -                     | Proteins and amino acids, phenolic compounds, carbohydrates, alkaloids | -                                              | "Standard concentration"                | 17.5±0.289 mm                      | Zones greater than 10 mm are considered positive results. | [3]       |
|                                  |                                                       | Hexane             | -                     | Proteins and amino acids, phenolic compounds, carbohydrates, alkaloids | -                                              | "Standard concentration"                | 15.43±0.296 mm                     | Zones greater than 10 mm are considered positive results. | [3]       |
|                                  |                                                       | DMSO               | -                     | Proteins and amino acids, phenolic compounds,                          | -                                              | "Standard concentration"                | 20.5±0.500 mm                      | Zones greater than 10 mm are considered positive results. | [3]       |

|                          |                                       |               |        |                                                                                                         |   |                             |                   |                                                                    |     |
|--------------------------|---------------------------------------|---------------|--------|---------------------------------------------------------------------------------------------------------|---|-----------------------------|-------------------|--------------------------------------------------------------------|-----|
|                          |                                       |               |        | alkaloids,<br>sugar/glucosides                                                                          |   |                             |                   |                                                                    |     |
|                          |                                       | Diethyl ether | -      | Proteins and<br>amino acid,<br>phenolic<br>compounds,<br>alkaloids,<br>sugar/glucosides                 | - | "Standard<br>concentration" | 16.5±0.289 mm     | Zones greater<br>than 10 mm are<br>considered<br>positive results. | [3] |
| <i>Bacillus subtilis</i> | <i>Anthophycus<br/>longifolius</i>    | Chloroform    | -      | Proteins and<br>amino acids,<br>glycosides,<br>phenolic<br>compounds,<br>alkaloids,<br>sugar/glucosides | - | "Standard<br>concentration" | 18.16±0.166<br>mm | Zones greater<br>than 10 mm are<br>considered<br>positive results. | [3] |
|                          | <i>Antithamnion<br/>cruciatum</i>     | Dry powder    | Spring | -                                                                                                       | - | Disc thallus                | 2,5 mm            | -                                                                  | [2] |
|                          |                                       | Dry powder    | Summer | -                                                                                                       | - | Disc thallus                | 1 mm              | -                                                                  | [2] |
|                          | <i>Asparagopsis<br/>armata</i>        | Dry powder    | Summer | -                                                                                                       | - | Disc thallus                | 11 mm             | -                                                                  | [2] |
|                          | <i>Avrainvillea<br/>nigricans</i>     | Ethyl acetate | -      | -                                                                                                       | - | 100 µL                      | 0.36              | Data of<br>inhibition not<br>specified                             | [4] |
|                          | <i>Bifurcaria bifurcata</i>           | Dry powder    | Spring | -                                                                                                       | - | Disc thallus                | 1,5 mm            | -                                                                  | [2] |
|                          |                                       | Dry powder    | Summer | -                                                                                                       | - | Disc thallus                | 2 mm              | -                                                                  | [2] |
|                          |                                       | Dry powder    | Autumn | -                                                                                                       | - | Disc thallus                | 1,5 mm            | -                                                                  | [2] |
|                          | <i>Bonnemaisonia<br/>asparagoides</i> | Dry powder    | Summer | -                                                                                                       | - | Disc thallus                | 13 mm             | -                                                                  | [2] |
|                          | <i>Bonnemaisonia<br/>hamifera</i>     | Dry powder    | Summer | -                                                                                                       | - | Disc thallus                | 15 mm             | -                                                                  | [2] |
|                          | <i>Bostrychia<br/>scorpioides</i>     | Dry powder    | Spring | -                                                                                                       | - | Disc thallus                | 2 mm              | -                                                                  | [2] |
|                          |                                       | Dry powder    | Summer | -                                                                                                       | - | Disc thallus                | 0,5 mm            | -                                                                  | [2] |
|                          |                                       | Dry powder    | Autumn | -                                                                                                       | - | Disc thallus                | 1 mm              | -                                                                  | [2] |
|                          |                                       | Dry powder    | Winter | -                                                                                                       | - | Disc thallus                | 1,5 mm            | -                                                                  | [2] |
|                          | <i>Bryopsis plumosa</i>               | Dry powder    | Spring | -                                                                                                       | - | Disc thallus                | 1,5 mm            | -                                                                  | [2] |
|                          |                                       | Dry powder    | Summer | -                                                                                                       | - | Disc thallus                | 0,5 mm            | -                                                                  | [2] |
|                          | <i>Alsidium triquetrum</i>            | Ethanol       | -      | -                                                                                                       | - | 20 µL                       | 7.7±1.1 mm        | -                                                                  | [5] |
|                          |                                       | Chloroform    | -      | -                                                                                                       | - | 20 µL                       | 9.3±0.6 mm        | -                                                                  | [5] |
|                          |                                       | Dry powder    | Spring | -                                                                                                       | - | Disc thallus                | 3 mm              | -                                                                  | [2] |

|                          |                                 |            |                                            |   |   |                                  |             |                |     |
|--------------------------|---------------------------------|------------|--------------------------------------------|---|---|----------------------------------|-------------|----------------|-----|
|                          | <i>Callithamnion tetragonum</i> | Dry powder | Summer                                     | - | - | Disc thallus                     | 3 mm        | -              | [2] |
|                          |                                 | Dry powder | Autumn                                     | - | - | Disc thallus                     | 3 mm        | -              | [2] |
| <i>Bacillus subtilis</i> | <i>Callithamnion tetragonum</i> | Dry powder | Winter                                     | - | - | Disc thallus                     | 2 mm        | -              | [2] |
|                          | <i>Callithamnion tetricum</i>   | Dry powder | Spring                                     | - | - | Disc thallus                     | 3,5 mm      | -              | [2] |
|                          |                                 | Dry powder | Summer                                     | - | - | Disc thallus                     | 4 mm        | -              | [2] |
|                          |                                 | Dry powder | Autumn                                     | - | - | Disc thallus                     | 4 mm        | -              | [2] |
|                          |                                 | Dry powder | Winter                                     | - | - | Disc thallus                     | 2,5 mm      | -              | [2] |
|                          | <i>Callocolax neglectus</i>     | Dry powder | Summer                                     | - | - | Disc thallus                     | 1 mm        | -              | [2] |
|                          |                                 | Dry powder | Autumn                                     | - | - | Disc thallus                     | 0,5 mm      | -              | [2] |
|                          | <i>Carradoriella elongata</i>   | Dry powder | Spring                                     | - | - | Disc thallus                     | 12 mm       | -              | [2] |
|                          |                                 | Dry powder | Summer                                     | - | - | Disc thallus                     | 12,5 mm     | -              | [2] |
|                          |                                 | Dry powder | Autumn                                     | - | - | Disc thallus                     | 12 mm       | -              | [2] |
|                          |                                 | Dry powder | Winter                                     | - | - | Disc thallus                     | 10 mm       | -              | [2] |
|                          | <i>Caulerpa ashmeadii</i>       | Ethanol    | -                                          | - | - | 20 µL                            | 10.3±0.6 mm | -              | [5] |
|                          |                                 | Chloroform | -                                          | - | - | 20 µL                            | 11.3±0.6 mm | -              | [5] |
|                          | <i>Caulerpa cupressoides</i>    | Ethanol    | -                                          | - | - | 20 µL                            | 11.0±1.0 mm | -              | [5] |
|                          | <i>Caulerpa mexicana</i>        | Ethanol    | -                                          | - | - | 20 µL                            | 9.3±0.6 mm  | -              | [5] |
|                          |                                 | Chloroform | -                                          | - | - | 20 µL                            | 7.0±0.0 mm  | -              | [5] |
|                          | <i>Caulerpa paspaloides</i>     | Ethanol    | -                                          | - | - | 20 µL                            | 8.6±0.6 mm  | -              | [5] |
|                          |                                 | Chloroform | -                                          | - | - | 20 µL                            | 8.3±0.6 mm  | -              | [5] |
|                          | <i>Caulerpa prolifera</i>       | Ethanol    | -                                          | - | - | 20 µL                            | 9.6±0.6 mm  | -              | [5] |
|                          |                                 | Chloroform | -                                          | - | - | 20 µL                            | 10.0±0.0 mm | -              | [5] |
|                          | <i>Caulerpa racemosa</i>        | Ethanol    | -                                          | - | - | 20 µL                            | 7.3±0.6 mm  | -              | [5] |
|                          |                                 | Chloroform | -                                          | - | - | 20 µL                            | 7.0±0.0 mm  | -              | [5] |
|                          | <i>Caulerpa taxifolia</i>       | Acetone    | Septembre<br>Station 1<br>Distal portion   | - | - | 100 µL (200 mg<br>of dry weight) | 0-5 mm      | Graphical data | [6] |
|                          |                                 | Acetone    | Septembre<br>Station 1<br>Proximal portion | - | - | 100 µL (200 mg<br>of dry weight) | 0-5 mm      | Graphical data | [6] |
|                          |                                 | Acetone    | Septembre<br>Station 2<br>Distal portion   | - | - | 100 µL (200 mg<br>of dry weight) | 10-15 mm    | Graphical data | [6] |
|                          |                                 | Acetone    | Septembre<br>Station 2                     | - | - | 100 µL (200 mg<br>of dry weight) | 10 mm       | Graphical data | [6] |

|                          |                               |                 |                                            |   |   |                                     |             |                |     |
|--------------------------|-------------------------------|-----------------|--------------------------------------------|---|---|-------------------------------------|-------------|----------------|-----|
| <i>Bacillus subtilis</i> | <i>Caulerpa taxifolia</i>     |                 | Proximal portion                           |   |   |                                     |             |                |     |
|                          |                               | Acetone         | April<br>Station 1<br>Distal portion       | - | - | 100 µL (200 mg<br>of dry weight)    | 0-5 mm      | Graphical data | [6] |
|                          |                               | Acetone         | April<br>Station 2<br>Distal portion       | - | - | 100 µL (200 mg<br>of dry weight)    | 10-15 mm    | Graphical data | [6] |
|                          |                               | Acetone         | April<br>Station 2<br>Proximal portion     | - | - | 100 µL (200 mg<br>of dry weight)    | 10-15 mm    | Graphical data | [6] |
|                          |                               | Ethanol         | Septembre<br>Station 1<br>Distal portion   | - | - | 100 µL (200 mg<br>of dry weight)    | 0-5 mm      | Graphical data | [6] |
|                          |                               | Ethanol         | Septembre<br>Station 1<br>Proximal portion | - | - | 100 µL (200 mg<br>of dry weight)    | 0-5 mm      | Graphical data | [6] |
|                          |                               | Ethanol         | Septembre<br>Station 2<br>Distal portion   | - | - | 100 µL (200 mg<br>of dry weight)    | 5-10 mm     | Graphical data | [6] |
|                          |                               | Ethanol         | Septembre<br>Station 2<br>Proximal portion | - | - | 100 µL (200 mg<br>of dry weight)    | 5-10 mm     | Graphical data | [6] |
|                          |                               | Ethanol         | April<br>Station 1<br>Distal portion       | - | - | 100 µL (200 mg<br>of dry weight)    | 0-5 mm      | Graphical data | [6] |
|                          |                               | Ethanol         | April<br>Station 1<br>Proximal portion     | - | - | 100 µL (200 mg<br>of dry weight)    | 5 mm        | Graphical data | [6] |
|                          |                               | Ethanol         | April<br>Station 2<br>Distal portion       | - | - | 100 µL (200 mg<br>of dry weight)    | 10-15 mm    | Graphical data | [6] |
|                          |                               | Ethanol         | April<br>Station 2<br>Proximal portion     | - | - | 100 µL (200 mg<br>of dry weight)    | 5-10 mm     | Graphical data | [6] |
|                          | <i>Ceramium nitens</i>        | Ethanol         | -                                          | - | - | 20 µL                               | 10.0±1.7 mm | -              | [5] |
|                          |                               | Chloroform      | -                                          | - | - | 20 µL                               | 22.3±2.1 mm | -              | [5] |
|                          | <i>Chaetomorpha antennina</i> | Petroleum ether | -                                          | - | - | 100 µg/mL<br>(dissolved in<br>DMSO) | 6 ± 0.6 mm  | -              | [7] |

|                          |                               |                 |                                      |   |   |                               |                |                |     |
|--------------------------|-------------------------------|-----------------|--------------------------------------|---|---|-------------------------------|----------------|----------------|-----|
| <i>Bacillus subtilis</i> | <i>Chaetomorpha antennina</i> | Petroleum ether | -                                    | - | - | 200 µg/mL (dissolved in DMSO) | 5 ± 0.8 mm     | -              | [7] |
|                          |                               | Petroleum ether | -                                    | - | - | 300 µg/mL (dissolved in DMSO) | 7.33 ± 0.5 mm  | -              | [7] |
|                          |                               | Petroleum ether | -                                    | - | - | 400 µg/mL (dissolved in DMSO) | 11.66 ± 0.5 mm | -              | [7] |
|                          |                               | Petroleum ether | -                                    | - | - | 500 µg/mL (dissolved in DMSO) | 12.5 ± 0.8 mm  | -              | [7] |
|                          |                               | Acetone         | Septembre Station 1 Distal portion   | - | - | 100 µL (200 mg of dry weight) | 15-20 mm       | Graphical data | [6] |
|                          |                               | Acetone         | Septembre Station 1 Proximal portion | - | - | 100 µL (200 mg of dry weight) | 15-20 mm       | Graphical data | [6] |
|                          |                               | Acetone         | Septembre Station 2 Distal portion   | - | - | 100 µL (200 mg of dry weight) | 10-15 mm       | Graphical data | [6] |
|                          |                               | Acetone         | Septembre Station 2 Proximal portion | - | - | 100 µL (200 mg of dry weight) | 15 mm          | Graphical data | [6] |
|                          |                               | Acetone         | December Station 2 Distal portion    | - | - | 100 µL (200 mg of dry weight) | 10-15 mm       | Graphical data | [6] |
|                          |                               | Acetone         | December Station 1 Proximal portion  | - | - | 100 µL (200 mg of dry weight) | 5-10 mm        | Graphical data | [6] |
|                          |                               | Acetone         | April Station 1 Distal portion       | - | - | 100 µL (200 mg of dry weight) | 5-10 mm        | Graphical data | [6] |
|                          |                               | Acetone         | April Station 1 Proximal portion     | - | - | 100 µL (200 mg of dry weight) | 10 mm          | Graphical data | [6] |
|                          |                               | Acetone         | April Station 2 Distal portion       | - | - | 100 µL (200 mg of dry weight) | 15-20 mm       | Graphical data | [6] |
|                          |                               | Acetone         | April Station 2                      | - | - | 100 µL (200 mg of dry weight) | 10 mm          | Graphical data | [6] |

|                          |                               |               |                                            |   |   |                                  |               |                |     |
|--------------------------|-------------------------------|---------------|--------------------------------------------|---|---|----------------------------------|---------------|----------------|-----|
|                          |                               |               | Proximal portion                           |   |   |                                  |               |                |     |
| <i>Bacillus subtilis</i> | <i>Chaetomorpha antennina</i> | Ethanol       | Septembre<br>Station 1<br>Distal portion   | - | - | 100 µL (200 mg<br>of dry weight) | 15-20 mm      | Graphical data | [6] |
|                          |                               | Ethanol       | Septembre<br>Station 1<br>Proximal portion | - | - | 100 µL (200 mg<br>of dry weight) | 20-25 mm      | Graphical data | [6] |
|                          |                               | Ethanol       | Septembre<br>Station 2<br>Distal portion   | - | - | 100 µL (200 mg<br>of dry weight) | 5 mm          | Graphical data | [6] |
|                          |                               | Ethanol       | Septembre<br>Station 2<br>Proximal portion | - | - | 100 µL (200 mg<br>of dry weight) | 5-10 mm       | Graphical data | [6] |
|                          |                               | Ethanol       | December<br>Station 1<br>Distal portion    | - | - | 100 µL (200 mg<br>of dry weight) | 20-25 mm      | Graphical data | [6] |
|                          |                               | Ethanol       | December<br>Station 1<br>Proximal portion  | - | - | 100 µL (200 mg<br>of dry weight) | 10-15 mm      | Graphical data | [6] |
|                          |                               | Ethanol       | April<br>Station 1<br>Distal portion       | - | - | 100 µL (200 mg<br>of dry weight) | 5-10 mm       | Graphical data | [6] |
|                          |                               | Ethanol       | April<br>Station 1<br>Proximal portion     | - | - | 100 µL (200 mg<br>of dry weight) | 5-10 mm       | Graphical data | [6] |
|                          |                               | Ethanol       | April<br>Station 2<br>Distal portion       | - | - | 100 µL (200 mg<br>of dry weight) | 10 mm         | Graphical data | [6] |
|                          |                               | Ethanol       | April<br>Station 2<br>Proximal portion     | - | - | 100 µL (200 mg<br>of dry weight) | 10 mm         | Graphical data | [6] |
|                          | <i>Chaetomorpha linum</i>     | Ethyl acetate | -                                          | - | - | 1.25 mg/disc                     | 9.33±0.58 mm  | -              | [8] |
|                          |                               | Ethyl acetate | -                                          | - | - | 2.5 mg/disc                      | 10.00±0.00 mm | -              | [8] |
|                          |                               | Ethyl acetate | -                                          | - | - | 5 mg/disc                        | 11.00±0.00 mm | -              | [8] |
|                          |                               | Acetone       | -                                          | - | - | 1.25 mg/disc                     | 10.67±0.58 mm | -              | [8] |
|                          |                               | Acetone       | -                                          | - | - | 2.5 mg/disc                      | 12.67±0.58 mm | -              | [8] |
|                          |                               | Acetone       | -                                          | - | - | 5 mg/disc                        | 15.67±0.58 mm | -              | [8] |
|                          | <i>Chondria dasyphylla</i>    | Spring        | -                                          | - | - | Disc thallus                     | 3 mm          | -              | [2] |
|                          |                               | Summer        | -                                          | - | - | Disc thallus                     | 0,5 mm        | -              | [2] |

|                          |                                 |               |                                            |   |   |                                  |          |                                        |     |
|--------------------------|---------------------------------|---------------|--------------------------------------------|---|---|----------------------------------|----------|----------------------------------------|-----|
| <i>Bacillus subtilis</i> | <i>Chondria dasyphylla</i>      | Autumn        | -                                          | - | - | Disc thallus                     | 1,5 mm   | -                                      | [2] |
|                          |                                 | Winter        | -                                          | - | - | Disc thallus                     | 1,5 mm   | -                                      | [2] |
|                          | <i>Chondrus crispus</i>         | Spring        | -                                          | - | - | Disc thallus                     | 11,5 mm  | -                                      | [2] |
|                          |                                 | Summer        | -                                          | - | - | Disc thallus                     | 12 mm    | -                                      | [2] |
|                          |                                 | Autumn        | -                                          | - | - | Disc thallus                     | 12 mm    | -                                      | [2] |
|                          |                                 | Winter        | -                                          | - | - | Disc thallus                     | 17 mm    | -                                      | [2] |
|                          | <i>Chordaria flagelliformis</i> | Summer        | -                                          | - | - | Disc thallus                     | 2,5 mm   | -                                      | [2] |
|                          |                                 | Autumn        | -                                          | - | - | Disc thallus                     | 2 mm     | -                                      | [2] |
|                          | <i>Cladophora vagabunda</i>     | Acetone       | Septembre<br>Station 1<br>Distal portion   | - | - | 100 µL (200 mg<br>of dry weight) | 10-15 mm | Graphical data                         | [6] |
|                          |                                 | Acetone       | April<br>Station 1<br>Distal portion       | - | - | 100 µL (200 mg<br>of dry weight) | 0-5 mm   | Graphical data                         | [6] |
|                          |                                 | Acetone       | April<br>Station 1<br>Proximal portion     | - | - | 100 µL (200 mg<br>of dry weight) | 0-5 mm   | Graphical data                         | [6] |
|                          |                                 | Ethanol       | Septembre<br>Station 1<br>Distal portion   | - | - | 100 µL (200 mg<br>of dry weight) | 15 mm    | Graphical data                         | [6] |
|                          |                                 | Ethanol       | Septembre<br>Station 1<br>Proximal portion | - | - | 100 µL (200 mg<br>of dry weight) | 10 mm    | Graphical data                         | [6] |
|                          |                                 | Ethanol       | April<br>Station 1<br>Distal portion       | - | - | 100 µL (200 mg<br>of dry weight) | 0-5 mm   | Graphical data                         | [6] |
|                          | <i>Codium decorticatum</i>      | Ethyl acetate | -                                          | - | - | 100 µL                           | 0.38     | Data of<br>inhibition not<br>specified | [4] |
|                          | <i>Codium fragile</i>           | Spring        | -                                          | - | - | Disc thallus                     | 4,5 mm   | -                                      | [2] |
|                          |                                 | Summer        | -                                          | - | - | Disc thallus                     | 4 mm     | -                                      | [2] |
|                          |                                 | Autumn        | -                                          | - | - | Disc thallus                     | 2 mm     | -                                      | [2] |
|                          |                                 | Winter        | -                                          | - | - | Disc thallus                     | 2 mm     | -                                      | [2] |
|                          | <i>Codium intertextum</i>       | n-hexane      | Winter                                     | - | - | 5 µL                             | 10 mm    | -                                      | [9] |
|                          |                                 | Ethyl acetate | Autumn                                     | - | - | 5 µL                             | 8 mm     | -                                      | [9] |
|                          |                                 | Methanol      | Autumn                                     | - | - | 5 µL                             | 16 mm    | -                                      | [9] |
|                          |                                 | Methanol      | Winter                                     | - | - | 5 µL                             | 28 mm    | -                                      | [9] |



|                          |                                                                  |               |        |                        |   |              |              |                                            |      |
|--------------------------|------------------------------------------------------------------|---------------|--------|------------------------|---|--------------|--------------|--------------------------------------------|------|
| <i>Bacillus subtilis</i> | <i>Codium isthmocladum</i>                                       | Chloroform    | -      | -                      | - | 20 µL        | 7.0±0.0 mm   | -                                          | [5]  |
|                          | <i>Codium tomentosum</i>                                         | Dry powder    | Spring | -                      | - | Disc thallus | 4 mm         | -                                          | [2]  |
|                          |                                                                  | Dry powder    | Summer | -                      | - | Disc thallus | 3 mm         | -                                          | [2]  |
|                          |                                                                  | Dry powder    | Autumn | -                      | - | Disc thallus | 2,5 mm       | -                                          | [2]  |
|                          |                                                                  | Dry powder    | Winter | -                      | - | Disc thallus | 2 mm         | -                                          | [2]  |
|                          | <i>Colpomenia sinuosa</i>                                        | Methanol      | -      | -                      | - | 2 µg/mL      | 17 mm        | Species analysed as human/animal pathogens | [10] |
|                          | <i>Crassiphycus changii</i>                                      | Diethyl ether | -      | 2-hydroxymyristic acid | - | 0.2 mg/disc  | 10.0 ±2 mm   | -                                          | [11] |
|                          |                                                                  | Diethyl ether | -      | Cholesteryl myristate  | - | 0.2 mg/disc  | 8.6 ±1.15 mm | -                                          | [11] |
|                          | <i>Delesseria sanguinea</i>                                      | Dry powder    | Spring | -                      | - | Disc thallus | 2 mm         | -                                          | [2]  |
|                          | <i>Desmarestia aculeata</i><br><i>Dictyopteris polypodioides</i> | Dry powder    | Spring | -                      | - | Disc thallus | 8,5 mm       | -                                          | [2]  |
|                          |                                                                  | Dry powder    | Summer | -                      | - | Disc thallus | 7 mm         | -                                          | [2]  |
|                          |                                                                  | Dry powder    | Autumn | -                      | - | Disc thallus | 6 mm         | -                                          | [2]  |
|                          |                                                                  | Dry powder    | Winter | -                      | - | Disc thallus | 2,5 mm       | -                                          | [2]  |
|                          | <i>Desmarestia ligulata</i>                                      | Dry powder    | Summer | -                      | - | Disc thallus | 20,5 mm      | -                                          | [2]  |
|                          |                                                                  | Dry powder    | Autumn | -                      | - | Disc thallus | 20 mm        | -                                          | [2]  |
|                          | <i>Dictyopteris polypodioides</i>                                | Dry powder    | Spring | -                      | - | Disc thallus | 4 mm         | -                                          | [2]  |
|                          |                                                                  | Dry powder    | Summer | -                      | - | Disc thallus | 4 mm         | -                                          | [2]  |
|                          |                                                                  | Dry powder    | Autumn | -                      | - | Disc thallus | 4 mm         | -                                          | [2]  |
|                          |                                                                  | Dry powder    | Winter | -                      | - | Disc thallus | 1 mm         | -                                          | [2]  |
|                          | <i>Dictyota cervicornis</i>                                      | Ethanol       | -      | -                      | - | 2 mg/disc    | 8 mm         | -                                          | [12] |
|                          |                                                                  | Ethanol       | -      | -                      | - | 4 mg/disc    | 11 mm        | -                                          | [12] |
|                          |                                                                  | Ethanol       | -      | -                      | - | 6 mg/disc    | 14 mm        | -                                          | [12] |
|                          | <i>Dictyota dichotoma</i>                                        | Dry powder    | Spring | -                      | - | Disc thallus | 0,5 mm       | -                                          | [2]  |
|                          |                                                                  | Dry powder    | Summer | -                      | - | Disc thallus | 4,5 mm       | -                                          | [2]  |
|                          |                                                                  | Dry powder    | Autumn | -                      | - | Disc thallus | 2,5 mm       | -                                          | [2]  |
|                          | <i>Dictyota dichotoma</i> var <i>intricata</i>                   | Ethanol       | -      | -                      | - | 2 mg/disc    | 9 mm         | -                                          | [12] |
|                          |                                                                  | Ethanol       | -      | -                      | - | 4 mg/disc    | 10 mm        | -                                          | [12] |
|                          |                                                                  | Ethanol       | -      | -                      | - | 6 mg/disc    | 12 mm        | -                                          | [12] |
|                          | <i>Digenea simplex</i>                                           | Ethanol       | -      | -                      | - | 20 µL        | 7.3±0.6 mm   | -                                          | [5]  |

|                      |                          |            |        |   |                                |                                 |            |      |      |
|----------------------|--------------------------|------------|--------|---|--------------------------------|---------------------------------|------------|------|------|
| Bacillus subtilis    |                          | Chloroform | -      | - | -                              | 20 µL                           | 7.0±0.0 mm | -    | [5]  |
|                      | Dilsea carnosa           | Dry powder | Spring | - | -                              | Disc thallus                    | 9 mm       | -    | [2]  |
|                      |                          | Dry powder | Summer | - | -                              | Disc thallus                    | 8 mm       | -    | [2]  |
|                      |                          | Dry powder | Autumn | - | -                              | Disc thallus                    | 5 mm       | -    | [2]  |
|                      |                          | Dry powder | Winter | - | -                              | Disc thallus                    | 2,5 mm     | -    | [2]  |
|                      | Enteromorpha antenna*    | Methanol   | -      | - | -                              | 250 µg/mL<br>(extract in DMSO)  | 10 mm      | -    | [13] |
|                      |                          | Methanol   | -      | - | -                              | 500 µg/mL<br>(extract in DMSO)  | 11 mm      | -    | [13] |
|                      |                          | Methanol   | -      | - | -                              | 750 µg/mL<br>(extract in DMSO)  | 12 mm      | -    | [13] |
|                      |                          | Methanol   | -      | - | -                              | 1000 µg/mL<br>(extract in DMSO) | 14 mm      | -    | [13] |
|                      | Ericaria selaginoides    | Dry powder | Spring | - | -                              | Disc thallus                    | 3 mm       | -    | [2]  |
|                      |                          | Dry powder | Summer | - | -                              | Disc thallus                    | 3 mm       | -    | [2]  |
|                      |                          | Dry powder | Autumn | - | -                              | Disc thallus                    | 2,5 mm     | -    | [2]  |
|                      |                          | Dry powder | Winter | - | -                              | Disc thallus                    | 0,5 mm     | -    | [2]  |
|                      | Eudesme virescens        | Dry powder | Summer | - | -                              | Disc thallus                    | 2 mm       | -    | [2]  |
|                      |                          | Dry powder | Autumn | - | -                              | Disc thallus                    | 2 mm       | -    | [2]  |
|                      | Gloiosiphonia capillaris | Dry powder | Summer | - | -                              | Disc thallus                    | 27 mm      | -    | [2]  |
|                      | Gongolaria baccata       | Dry powder | Spring | - | -                              | Disc thallus                    | 3 mm       | -    | [2]  |
|                      |                          | Dry powder | Summer | - | -                              | Disc thallus                    | 2 mm       | -    | [2]  |
|                      |                          | Dry powder | Autumn | - | -                              | Disc thallus                    | 2 mm       | -    | [2]  |
|                      |                          | Dry powder | Winter | - | -                              | Disc thallus                    | 1 mm       | -    | [2]  |
| Gracilaria caudata   | Ethanol                  | -          | -      | - | 20 µL                          | 12.3±0.6 mm                     | -          | [5]  |      |
|                      | Chloroform               | -          | -      | - | 20 µL                          | 10.0±1.0 mm                     | -          | [5]  |      |
| Gracilaria cornea    | Ethanol                  | -          | -      | - | 20 µL                          | 8.3±0.6 mm                      | -          | [5]  |      |
|                      | Chloroform               | -          | -      | - | 20 µL                          | 8.7±0.6 mm                      | -          | [5]  |      |
| Gracilaria corticata | Methanol                 | -          | -      | - | 750 µg/mL<br>(extract in DMSO) | 12 mm                           |            | [13] |      |

|                          |                             |              |   |                                                                                                                                                       |   |                                 |              |                                                                                                                                        |      |
|--------------------------|-----------------------------|--------------|---|-------------------------------------------------------------------------------------------------------------------------------------------------------|---|---------------------------------|--------------|----------------------------------------------------------------------------------------------------------------------------------------|------|
|                          |                             | Methanol     | - | -                                                                                                                                                     | - | 1000 µg/mL<br>(extract in DMSO) | 15 mm        |                                                                                                                                        | [13] |
|                          |                             | 70% methanol | - | Sulfurous acid, 2-ethylhexyl isohexyl ester, hexatriacontane, octacosane, mono (2-ethylhexyl) phthalate, 1-iodo-2-methylundecane and pentatriacontane | - | 100 µg/mL                       | 8 ± 0.01 mm  | Antibacterial activity associated with fatty acids and sulfurous acid, 2-ethylhexyl isohexyl ester, eugenol, benzene and phthalic acid | [14] |
|                          |                             | 70% methanol | - | Sulfurous acid, 2-ethylhexyl isohexyl ester, hexatriacontane, octacosane, mono (2-ethylhexyl) phthalate, 1-iodo-2-methylundecane and pentatriacontane | - | 200 µg/mL                       | 9 ± 0.03 mm  | Antibacterial activity associated with fatty acids and sulfurous acid, 2-ethylhexyl isohexyl ester, eugenol, benzene and phthalic acid | [14] |
| <i>Bacillus subtilis</i> | <i>Gracilaria corticata</i> | 70% methanol | - | Sulfurous acid, 2-ethylhexyl isohexyl ester, hexatriacontane, octacosane, mono (2-ethylhexyl) phthalate, 1-iodo-2-methylundecane and pentatriacontane | - | 300 µg/mL                       | 11 ± 0.00 mm | Antibacterial activity associated with fatty acids and sulfurous acid, 2-ethylhexyl isohexyl ester, eugenol, benzene and phthalic acid | [14] |
|                          |                             | 70% methanol | - | Sulfurous acid, 2-ethylhexyl isohexyl ester, hexatriacontane, octacosane, mono                                                                        | - | 400 µg/mL                       | 14 ± 0.11 mm | Antibacterial activity associated with fatty acids and sulfurous acid,                                                                 | [14] |

|                          |                             |              |   |                                                                                                                                                       |   |           |               |                                                                                                                                        |      |
|--------------------------|-----------------------------|--------------|---|-------------------------------------------------------------------------------------------------------------------------------------------------------|---|-----------|---------------|----------------------------------------------------------------------------------------------------------------------------------------|------|
| <i>Bacillus subtilis</i> | <i>Gracilaria corticata</i> |              |   | (2-ethylhexyl) phthalate, 1-iodo-2-methylundecane and pentatriacontane                                                                                |   |           |               | 2-ethylhexyl isohexyl ester, eugenol, benzene and phthalic acid                                                                        |      |
|                          |                             | 70% methanol | - | Sulfurous acid, 2-ethylhexyl isohexyl ester, hexatriacontane, octacosane, mono (2-ethylhexyl) phthalate, 1-iodo-2-methylundecane and pentatriacontane | - | 500 µg/mL | 16 ± 0.02 mm  | Antibacterial activity associated with fatty acids and sulfurous acid, 2-ethylhexyl isohexyl ester, eugenol, benzene and phthalic acid | [14] |
|                          |                             | DMSO         | - | Sulfurous acid, 2-ethylhexyl isohexyl ester, hexatriacontane, octacosane, mono (2-ethylhexyl) phthalate, 1-iodo-2-methylundecane and pentatriacontane | - | 100 µg/mL | 5 ± 0.12 mm   | Antibacterial activity associated with fatty acids and sulfurous acid, 2-ethylhexyl isohexyl ester, eugenol, benzene and phthalic acid | [14] |
|                          |                             | DMSO         | - | Sulfurous acid, 2-ethylhexyl isohexyl ester, hexatriacontane, octacosane, mono (2-ethylhexyl) phthalate, 1-iodo-2-methylundecane and pentatriacontane | - | 200 µg/mL | 6 ± 0.04 mm   | Antibacterial activity associated with fatty acids and sulfurous acid, 2-ethylhexyl isohexyl ester, eugenol, benzene and phthalic acid | [14] |
|                          |                             | DMSO         | - | Sulfurous acid, 2-ethylhexyl                                                                                                                          | - | 300 µg/mL | 7.5 ± 0.07 mm | Antibacterial activity                                                                                                                 | [14] |

|                          |                             |         |                                      |                                                                                                                                                       |   |                               |              |                                                                                                                                        |      |
|--------------------------|-----------------------------|---------|--------------------------------------|-------------------------------------------------------------------------------------------------------------------------------------------------------|---|-------------------------------|--------------|----------------------------------------------------------------------------------------------------------------------------------------|------|
|                          |                             |         |                                      | isohexyl ester, hexatriacontane, octacosane, mono (2-ethylhexyl) phthalate, 1-iodo-2-methylundecane and pentatriacontane                              |   |                               |              | associated with fatty acids and sulfurous acid, 2-ethylhexyl isohexyl ester, eugenol, benzene and phthalic acid                        |      |
|                          |                             | DMSO    | -                                    | Sulfurous acid, 2-ethylhexyl isohexyl ester, hexatriacontane, octacosane, mono (2-ethylhexyl) phthalate, 1-iodo-2-methylundecane and pentatriacontane | - | 400 µg/mL                     | 10 ± 0.01 mm | Antibacterial activity associated with fatty acids and sulfurous acid, 2-ethylhexyl isohexyl ester, eugenol, benzene and phthalic acid | [14] |
|                          |                             | DMSO    | -                                    | Sulfurous acid, 2-ethylhexyl isohexyl ester, hexatriacontane, octacosane, mono (2-ethylhexyl) phthalate, 1-iodo-2-methylundecane and pentatriacontane | - | 500 µg/mL                     | 12 ± 0.05 mm | Antibacterial activity associated with fatty acids and sulfurous acid, 2-ethylhexyl isohexyl ester, eugenol, benzene and phthalic acid | [14] |
|                          |                             | Acetone | Septembre Station 2 Distal portion   | -                                                                                                                                                     | - | 100 µL (200 mg of dry weight) | 0-5 mm       | Graphical data                                                                                                                         | [6]  |
| <i>Bacillus subtilis</i> | <i>Gracilaria corticata</i> | Acetone | Septembre Station 2 Proximal portion | -                                                                                                                                                     | - | 100 µL (200 mg of dry weight) | 5-10 mm      | Graphical data                                                                                                                         | [6]  |
|                          |                             | Acetone | December Station 1 Distal portion    | -                                                                                                                                                     | - | 100 µL (200 mg of dry weight) | 0-5 mm       | Graphical data                                                                                                                         | [6]  |
|                          |                             |         |                                      |                                                                                                                                                       |   |                               |              |                                                                                                                                        |      |

|                          |                             |         |                                         |   |   |                               |          |                |     |
|--------------------------|-----------------------------|---------|-----------------------------------------|---|---|-------------------------------|----------|----------------|-----|
|                          |                             | Acetone | December Station 1<br>Proximal portion  | - | - | 100 µL (200 mg of dry weight) | 5-10 mm  | Graphical data | [6] |
|                          |                             | Acetone | December Station 2<br>Distal portion    | - | - | 100 µL (200 mg of dry weight) | 0-5 mm   | Graphical data | [6] |
|                          |                             | Acetone | April Station 1<br>Distal portion       | - | - | 100 µL (200 mg of dry weight) | 5-10 mm  | Graphical data | [6] |
|                          |                             | Acetone | April Station 1<br>Proximal portion     | - | - | 100 µL (200 mg of dry weight) | 5-10 mm  | Graphical data | [6] |
|                          |                             | Acetone | April Station 2<br>Distal portion       | - | - | 100 µL (200 mg of dry weight) | 5-10 mm  | Graphical data | [6] |
|                          |                             | Acetone | April Station 2<br>Proximal portion     | - | - | 100 µL (200 mg of dry weight) | 5-10 mm  | Graphical data | [6] |
| <i>Bacillus subtilis</i> | <i>Gracilaria corticata</i> | Ethanol | Septembre Station 1<br>Distal portion   | - | - | 100 µL (200 mg of dry weight) | 5-10 mm  | Graphical data | [6] |
|                          |                             | Ethanol | Septembre Station 2<br>Distal portion   | - | - | 100 µL (200 mg of dry weight) | 10-15 mm | Graphical data | [6] |
|                          |                             | Ethanol | Septembre Station 2<br>Proximal portion | - | - | 100 µL (200 mg of dry weight) | 15 mm    | Graphical data | [6] |
|                          |                             | Ethanol | December Station 1<br>Distal portion    | - | - | 100 µL (200 mg of dry weight) | 5-10 mm  | Graphical data | [6] |
|                          |                             | Ethanol | December Station 1<br>Proximal portion  | - | - | 100 µL (200 mg of dry weight) | 5-10 mm  | Graphical data | [6] |
|                          |                             | Ethanol | December Station 2<br>Distal portion    | - | - | 100 µL (200 mg of dry weight) | 0-5 mm   | Graphical data | [6] |
|                          |                             | Ethanol | April Station 1<br>Distal portion       | - | - | 100 µL (200 mg of dry weight) | 5-10 mm  | Graphical data | [6] |
|                          |                             | Ethanol | April Station 1                         | - | - | 100 µL (200 mg of dry weight) | 10-15 mm | Graphical data | [6] |

|                          |                            |          |                                        |                                                                                                                                             |   |                                  |              |                                              |      |
|--------------------------|----------------------------|----------|----------------------------------------|---------------------------------------------------------------------------------------------------------------------------------------------|---|----------------------------------|--------------|----------------------------------------------|------|
|                          |                            |          | Proximal portion                       |                                                                                                                                             |   |                                  |              |                                              |      |
|                          |                            | Ethanol  | April<br>Station 2<br>Distal portion   | -                                                                                                                                           | - | 100 µL (200 mg<br>of dry weight) | 5-10 mm      | Graphical data                               | [6]  |
|                          |                            | Ethanol  | April<br>Station 2<br>Proximal portion | -                                                                                                                                           | - | 100 µL (200 mg<br>of dry weight) | 10-15 mm     | Graphical data                               | [6]  |
|                          | <i>Gracilaria gracilis</i> | Ethanol  | -                                      | High content in<br>total soluble<br>carbohydrate and<br>total phenolic<br>content (most<br>abundant<br>flavonoids: rutin<br>and hesperidin) | - | 50 µg (20 µL)                    | 10 ± 0.00 mm | -                                            | [15] |
|                          |                            | Ethanol  | -                                      | High content in<br>total soluble<br>carbohydrate and<br>total phenolic<br>content (most<br>abundant<br>flavonoids: rutin<br>and hesperidin) | - | 100 µg (20 µL)                   | 14.6 ± 0.5   | -                                            | [15] |
| <i>Bacillus subtilis</i> | <i>Gracilaria gracilis</i> | Ethanol  | -                                      | High content in<br>total soluble<br>carbohydrate and<br>total phenolic<br>content (most<br>abundant<br>flavonoids: rutin<br>and hesperidin) | - | 200 µg (20 µL)                   | 19 ± 1 mm    | Best activity<br>registered in this<br>study | [15] |
|                          |                            | Methanol | -                                      | High content in<br>total soluble<br>carbohydrate and<br>total phenolic<br>content (most<br>abundant<br>flavonoids: rutin<br>and hesperidin) | - | 50 µg (20 µL)                    | 7.6 ± 2 mm   | -                                            | [15] |
|                          |                            | Methanol | -                                      | High content in<br>total soluble                                                                                                            | - | 100 µg (20 µL)                   | 9.6 ± 0.5 mm | -                                            | [15] |

|                          |                            |            |   |                                                                                                                        |   |                |               |   |      |
|--------------------------|----------------------------|------------|---|------------------------------------------------------------------------------------------------------------------------|---|----------------|---------------|---|------|
|                          |                            |            |   | carbohydrate and total phenolic content (most abundant flavonoids: rutin and hesperidin)                               |   |                |               |   |      |
|                          |                            | Methanol   | - | High content in total soluble carbohydrate and total phenolic content (most abundant flavonoids: rutin and hesperidin) | - | 200 µg (20 µL) | 12.6 ± 1.1 mm | - | [15] |
|                          |                            | Acetone    | - | High content in total phenol content (most abundant flavonoids: rutin and hesperidin)                                  | - | 50 µg (20 µL)  | 10 ± 0.00 mm  | - | [15] |
| <i>Bacillus subtilis</i> | <i>Gracilaria gracilis</i> | Acetone    | - | High content in total phenol content (most abundant flavonoids: rutin and hesperidin)                                  | - | 100 µg (20 µL) | 11.6 ± 2.8 mm | - | [15] |
|                          |                            | Acetone    | - | High content in total phenol content (most abundant flavonoids: rutin and hesperidin)                                  | - | 200 µg (20 µL) | 13.6 ± 3.5 mm | - | [15] |
|                          |                            | Chloroform | - | Higher content in monounsaturated fatty acids and polyunsaturated fatty acids                                          | - | 50 µg (20 µL)  | 10.3 ± 0.5 mm | - | [15] |
|                          |                            | Chloroform | - | Higher content in monounsaturated fatty acids and                                                                      | - | 100 µg (20 µL) | 15.6 ± 3 mm   | - | [15] |



|                          |                                  |               |        |                                                                               |   |                |             |   |      |
|--------------------------|----------------------------------|---------------|--------|-------------------------------------------------------------------------------|---|----------------|-------------|---|------|
| <i>Bacillus subtilis</i> |                                  |               |        | polyunsaturated fatty acids                                                   |   |                |             |   |      |
|                          |                                  | Chloroform    | -      | Higher content in monounsaturated fatty acids and polyunsaturated fatty acids | - | 200 µg (20 µL) | 17.6 ± 2 mm | - | [15] |
|                          |                                  | Diethyl ether | -      | Higher content in saturated fatty acids                                       | - | 50 µg (20 µL)  | 10 ± 1 mm   | - | [15] |
|                          |                                  | Diethyl ether | -      | Higher content in saturated fatty acids                                       | - | 100 µg (20 µL) | 10.6 ± 2 mm | - | [15] |
|                          |                                  | Diethyl ether | -      | Higher content in saturated fatty acids                                       | - | 200 µg (20 µL) | 15.6 ± 3 mm | - | [15] |
|                          | <i>Gracilariopsis longissima</i> | Dry powder    | Winter | -                                                                             | - | Disc thallus   | 2 mm        | - | [2]  |
|                          | <i>Halidrys siliquosa</i>        | Dry powder    | Spring | -                                                                             | - | Disc thallus   | 4,5 mm      | - | [2]  |
|                          |                                  | Dry powder    | Summer | -                                                                             | - | Disc thallus   | 3,5 mm      | - | [2]  |
|                          | <i>Halidrys siliquosa</i>        | Dry powder    | Autumn | -                                                                             | - | Disc thallus   | 3,5 mm      | - | [2]  |
|                          |                                  | Dry powder    | Winter | -                                                                             | - | Disc thallus   | 1,5 mm      | - | [2]  |
|                          | <i>Halimeda incrassata</i>       | Ethanol       | -      | -                                                                             | - | 20 µL          | 7.3±0.6 mm  | - | [5]  |
|                          |                                  | Chloroform    | -      | -                                                                             | - | 20 µL          | 8.7±0.6 mm  | - | [5]  |
|                          | <i>Halimeda tuna</i>             | Ethanol       | -      | -                                                                             | - | 2 mg/disc      | 7 mm        | - | [12] |
|                          |                                  | Ethanol       | -      | -                                                                             | - | 4 mg/disc      | 10 mm       | - | [12] |
|                          |                                  | Ethanol       | -      | -                                                                             | - | 6 mg/disc      | 14 mm       | - | [12] |
|                          |                                  | Methanol      | -      | -                                                                             | - | 0.1 mL         | 2-3 mm      | - | [16] |
|                          | <i>Halopithys incurva</i>        | Dry powder    | Spring | -                                                                             | - | Disc thallus   | 3 mm        | - | [2]  |
|                          |                                  | Dry powder    | Summer | -                                                                             | - | Disc thallus   | 1,5 mm      | - | [2]  |
|                          |                                  | Dry powder    | Autumn | -                                                                             | - | Disc thallus   | 1,5 mm      | - | [2]  |
|                          |                                  | Dry powder    | Winter | -                                                                             | - | Disc thallus   | 1 mm        | - | [2]  |
|                          | <i>Halopterois scoparia</i>      | Ethyl acetate | Autumn | -                                                                             | - | 5 µL           | 12 mm       | - | [9]  |
|                          |                                  | Methanol      | Autumn | -                                                                             | - | 5 µL           | 15 mm       | - | [9]  |
|                          |                                  | Methanol      | Winter | -                                                                             | - | 5 µL           | 22 mm       | - | [9]  |

|                          |                               |                                      |   |                                                                                                               |   |           |             |                                                                                                                                        |      |
|--------------------------|-------------------------------|--------------------------------------|---|---------------------------------------------------------------------------------------------------------------|---|-----------|-------------|----------------------------------------------------------------------------------------------------------------------------------------|------|
|                          | <i>Halymenia floresia</i>     | Ethyl acetate partition of Methanols | - | -                                                                                                             | - | 100 µL    | 0.31        | Data of inhibition not specified                                                                                                       | [4]  |
|                          | <i>Hormophysa cuneiformis</i> | Methanol                             | - | -                                                                                                             | - | 0.1 mL    | 2-3 mm      | -                                                                                                                                      | [16] |
|                          | <i>Hydropuntia edulis</i>     | 70% methanol                         | - | Eugenol, nonane, undecane, hept-2-ene, 2,4,4,6-tetramethyl, sulfurous acid, phthalic acid and 1,2-propanediol | - | 100 µg/mL | 3 ± 0.03 mm | Antibacterial activity associated with fatty acids and sulfurous acid, 2-ethylhexyl isohexyl ester, eugenol, benzene and phthalic acid | [14] |
|                          |                               | 70% methanol                         | - | Eugenol, nonane, undecane, hept-2-ene, 2,4,4,6-tetramethyl, sulfurous acid, phthalic acid and 1,2-propanediol | - | 200 µg/mL | 3 ± 0.00 mm | Antibacterial activity associated with fatty acids and sulfurous acid, 2-ethylhexyl isohexyl ester, eugenol, benzene and phthalic acid | [14] |
|                          |                               | 70% methanol                         | - | Eugenol, nonane, undecane, hept-2-ene, 2,4,4,6-tetramethyl, sulfurous acid, phthalic acid and 1,2-propanediol | - | 300 µg/mL | 4 ± 0.10 mm | Antibacterial activity associated with fatty acids and sulfurous acid, 2-ethylhexyl isohexyl ester, eugenol, benzene and phthalic acid | [14] |
| <i>Bacillus subtilis</i> | <i>Hydropuntia edulis</i>     | 70% methanol                         | - | Eugenol, nonane, undecane, hept-2-ene, 2,4,4,6-tetramethyl, sulfurous acid,                                   | - | 400 µg/mL | 5 ± 0.30 mm | Antibacterial activity associated with fatty acids and sulfurous acid,                                                                 | [14] |

|                          |                           |              |   |                                                                                                               |   |           |               |                                                                                                                                        |      |
|--------------------------|---------------------------|--------------|---|---------------------------------------------------------------------------------------------------------------|---|-----------|---------------|----------------------------------------------------------------------------------------------------------------------------------------|------|
|                          |                           |              |   | phthalic acid and 1,2-propanediol                                                                             |   |           |               | 2-ethylhexyl isohexyl ester, eugenol, benzene and phthalic acid                                                                        |      |
|                          |                           | 70% methanol | - | Eugenol, nonane, undecane, hept-2-ene, 2,4,4,6-tetramethyl, sulfurous acid, phthalic acid and 1,2-propanediol | - | 500 µg/mL | 6 ± 0.01 mm   | Antibacterial activity associated with fatty acids and sulfurous acid, 2-ethylhexyl isohexyl ester, eugenol, benzene and phthalic acid | [14] |
|                          |                           | DMSO         | - | Eugenol, nonane, undecane, hept-2-ene, 2,4,4,6-tetramethyl, sulfurous acid, phthalic acid and 1,2-propanediol | - | 100 µg/mL | 5 ± 0.07 mm   | Antibacterial activity associated with fatty acids and sulfurous acid, 2-ethylhexyl isohexyl ester, eugenol, benzene and phthalic acid | [14] |
|                          |                           | DMSO         | - | Eugenol, nonane, undecane, hept-2-ene, 2,4,4,6-tetramethyl, sulfurous acid, phthalic acid and 1,2-propanediol | - | 200 µg/mL | 7 ± 0.06 mm   | Antibacterial activity associated with fatty acids and sulfurous acid, 2-ethylhexyl isohexyl ester, eugenol, benzene and phthalic acid | [14] |
| <i>Bacillus subtilis</i> | <i>Hydropuntia edulis</i> | DMSO         | - | Eugenol, nonane, undecane, hept-2-ene, 2,4,4,6-tetramethyl, sulfurous acid,                                   | - | 300 µg/mL | 7.5 ± 0.11 mm | Antibacterial activity associated with fatty acids and sulfurous acid, 2-ethylhexyl                                                    | [14] |

|                          |                              |                           |   |                                                                                                               |   |           |              |                                                                                                                                        |      |
|--------------------------|------------------------------|---------------------------|---|---------------------------------------------------------------------------------------------------------------|---|-----------|--------------|----------------------------------------------------------------------------------------------------------------------------------------|------|
|                          |                              |                           |   | phthalic acid and 1,2-propanediol                                                                             |   |           |              | isohexyl ester, eugenol, benzene and phthalic acid                                                                                     |      |
|                          |                              | DMSO                      | - | Eugenol, nonane, undecane, hept-2-ene, 2,4,4,6-tetramethyl, sulfurous acid, phthalic acid and 1,2-propanediol | - | 400 µg/mL | 9 ± 0.15 mm  | Antibacterial activity associated with fatty acids and sulfurous acid, 2-ethylhexyl isohexyl ester, eugenol, benzene and phthalic acid | [14] |
|                          |                              | DMSO                      | - | Eugenol, nonane, undecane, hept-2-ene, 2,4,4,6-tetramethyl, sulfurous acid, phthalic acid and 1,2-propanediol | - | 500 µg/mL | 15 ± 0.10 mm | Antibacterial activity associated with fatty acids and sulfurous acid, 2-ethylhexyl isohexyl ester, eugenol, benzene and phthalic acid | [14] |
|                          | <i>Iyengaria stellata</i>    | Methanol                  | - | -                                                                                                             | - | 2 µg/mL   | 14 mm        | Species analysed as human/animal pathogens                                                                                             | [10] |
| <i>Bacillus subtilis</i> | <i>Kappaphycus alvarezii</i> | Aqueous (gel-like liquid) | - | Tannins, flavonoids, alkaloids, steroids and saponins.                                                        | - | 40 µg/mL  | 4 mm         | -                                                                                                                                      | [17] |
|                          |                              | Aqueous (gel-like liquid) | - | Tannins, flavonoids, alkaloids, steroids and saponins.                                                        | - | 60 µg/mL  | 8 mm         | -                                                                                                                                      | [17] |
|                          |                              | Aqueous (gel-like liquid) | - | Tannins, flavonoids, alkaloids, steroids and saponins.                                                        | - | 80 µg/mL  | 8 mm         | -                                                                                                                                      | [17] |

|                          |                                                          |                           |        |                                                        |   |              |            |                                  |      |
|--------------------------|----------------------------------------------------------|---------------------------|--------|--------------------------------------------------------|---|--------------|------------|----------------------------------|------|
|                          |                                                          | Aqueous (gel-like liquid) | -      | Tannins, flavonoids, alkaloids, steroids and saponins. | - | 100 µg/mL    | 8 mm       | -                                | [17] |
|                          | <i>Laminaria digitata</i>                                | Dry powder                | Spring | -                                                      | - | Disc thallus | 6,5 mm     | -                                | [2]  |
|                          |                                                          | Dry powder                | Summer | -                                                      | - | Disc thallus | 4 mm       | -                                | [2]  |
|                          |                                                          | Dry powder                | Autumn | -                                                      | - | Disc thallus | 2,5 mm     | -                                | [2]  |
|                          |                                                          | Dry powder                | Winter | -                                                      | - | Disc thallus | 11,5 mm    | -                                | [2]  |
|                          | <i>Laurencia obtusa</i>                                  | Ethanol                   | -      | -                                                      | - | 20 µL        | 7.3±0.6 mm | -                                | [5]  |
|                          |                                                          | Chloroform                | -      | -                                                      | - | 20 µL        | 9.3±0.6 mm | -                                | [5]  |
|                          |                                                          | Dry powder                | Spring | -                                                      | - | Disc thallus | 4,5 mm     | -                                | [2]  |
|                          |                                                          | Dry powder                | Summer | -                                                      | - | Disc thallus | 4,5 mm     | -                                | [2]  |
|                          |                                                          | Dry powder                | Autumn | -                                                      | - | Disc thallus | 5 mm       | -                                | [2]  |
|                          |                                                          | Dry powder                | Winter | -                                                      | - | Disc thallus | 4 mm       | -                                | [2]  |
|                          |                                                          | Ethyl acetate             | -      | -                                                      | - | 100 µL       | 0.36       | Data of inhibition not specified | [4]  |
|                          | <i>Liaqura sp.*</i>                                      | Hexane                    | -      | -                                                      | - | 0.1 mL       | 2-3 mm     | -                                | [16] |
|                          | <i>Lychaete pellucida</i>                                | Dry powder                | Summer | -                                                      | - | Disc thallus | 0,5 mm     | -                                | [2]  |
|                          |                                                          | Dry powder                | Autumn | -                                                      | - | Disc thallus | 1 mm       | -                                | [2]  |
|                          | <i>Melanothamnus afaqhusainii</i>                        | Ethanol                   | -      | -                                                      | - | 2 mg/disc    | 9 mm       | -                                | [12] |
|                          |                                                          | Ethanol                   | -      | -                                                      | - | 4 mg/disc    | 9 mm       | -                                | [12] |
|                          |                                                          | Ethanol                   | -      | -                                                      | - | 6 mg/disc    | 10 mm      | -                                | [12] |
|                          | <i>Membranoptera alata</i><br><i>Membranoptera alata</i> | Dry powder                | Spring | -                                                      | - | Disc thallus | 2 mm       | -                                | [2]  |
|                          |                                                          | Dry powder                | Summer | -                                                      | - | Disc thallus | 1 mm       | -                                | [2]  |
| <i>Bacillus subtilis</i> | <i>Mesogloia vermiculata</i>                             | Dry powder                | Summer | -                                                      | - | Disc thallus | 2,5 mm     | -                                | [2]  |
|                          | <i>Odonthalia dentata</i>                                | Dry powder                | Spring | -                                                      | - | Disc thallus | 10 mm      | -                                | [2]  |
|                          |                                                          | Dry powder                | Summer | -                                                      | - | Disc thallus | 11 mm      | -                                | [2]  |
|                          |                                                          | Dry powder                | Autumn | -                                                      | - | Disc thallus | 10,5 mm    | -                                | [2]  |
|                          |                                                          | Dry powder                | Winter | -                                                      | - | Disc thallus | 11 mm      | -                                | [2]  |
|                          | <i>Osmundea hybrida</i>                                  | Dry powder                | Spring | -                                                      | - | Disc thallus | 5,5 mm     | -                                | [2]  |
|                          |                                                          | Dry powder                | Summer | -                                                      | - | Disc thallus | 5 mm       | -                                | [2]  |
|                          |                                                          | Dry powder                | Autumn | -                                                      | - | Disc thallus | 5 mm       | -                                | [2]  |

|                          |                                     |               |        |   |   |              |               |   |      |
|--------------------------|-------------------------------------|---------------|--------|---|---|--------------|---------------|---|------|
|                          | <i>Osmundea pinnatifida</i>         | Dry powder    | Winter | - | - | Disc thallus | 5 mm          | - | [2]  |
|                          |                                     | Dry powder    | Spring | - | - | Disc thallus | 7,5 mm        | - | [2]  |
|                          |                                     | Dry powder    | Summer | - | - | Disc thallus | 7 mm          | - | [2]  |
|                          |                                     | Dry powder    | Autumn | - | - | Disc thallus | 7 mm          | - | [2]  |
|                          |                                     | Dry powder    | Winter | - | - | Disc thallus | 8,5 mm        | - | [2]  |
|                          | <i>Padina gymnospora</i>            | Hexane        | -      | - | - | 2.5 mg/disc  | 8.33±0.58 mm  | - | [8]  |
|                          |                                     | Hexane        | -      | - | - | 5 mg/disc    | 8.67±0.58 mm  | - | [8]  |
|                          |                                     | Ethyl acetate | -      | - | - | 2.5 mg/disc  | 7.33±0.58 mm  | - | [8]  |
|                          |                                     | Ethyl acetate | -      | - | - | 5 mg/disc    | 8.33±0.58 mm  | - | [8]  |
|                          |                                     | Acetone       | -      | - | - | 1.25 mg/disc | 8.33±0.58 mm  | - | [8]  |
|                          |                                     | Acetone       | -      | - | - | 2.5 mg/disc  | 10.00±0.00 mm | - | [8]  |
|                          |                                     | Acetone       | -      | - | - | 5 mg/disc    | 11.67±0.58 mm | - | [8]  |
|                          | <i>Padina sp.</i>                   | Hexane        | -      | - | - | 0.1 mL       | 8-12 mm       | - | [16] |
|                          | <i>Penicillus capitatus</i>         | Ethanol       | -      | - | - | 20 µL        | 8.3±0.6 mm    | - | [5]  |
|                          |                                     | Chloroform    | -      | - | - | 20 µL        | 8.7±0.6 mm    | - | [5]  |
|                          | <i>Petrospongium berkeleyi</i>      | Dry powder    | Summer | - | - | Disc thallus | 1 mm          | - | [2]  |
|                          |                                     | Dry powder    | Autumn | - | - | Disc thallus | 1,5 mm        | - | [2]  |
|                          | <i>Phyllophora crispa</i>           | Dry powder    | Spring | - | - | Disc thallus | 2 mm          | - | [2]  |
|                          | <i>Phyllophora pseudoceranoïdes</i> | Dry powder    | Spring | - | - | Disc thallus | 2,5 mm        | - | [2]  |
|                          | <i>Polysiphonia stricta</i>         | Dry powder    | Spring | - | - | Disc thallus | 8 mm          | - | [2]  |
|                          |                                     | Dry powder    | Summer | - | - | Disc thallus | 8,5 mm        | - | [2]  |
|                          |                                     | Dry powder    | Autumn | - | - | Disc thallus | 8 mm          | - | [2]  |
|                          |                                     | Dry powder    | Winter | - | - | Disc thallus | 8,5 mm        | - | [2]  |
|                          | <i>Pterothamnion plumula</i>        | Dry powder    | Spring | - | - | Disc thallus | 2 mm          | - | [2]  |
|                          |                                     | Dry powder    | Summer | - | - | Disc thallus | 1,5 mm        | - | [2]  |
| <i>Bacillus subtilis</i> | <i>Pterothamnion plumula</i>        | Dry powder    | Autumn | - | - | Disc thallus | 1 mm          | - | [2]  |
|                          | <i>Ptilophora subcostata</i>        | Crude extract | -      | - | - | 60 µl        | >10 mm        | - | [18] |
|                          |                                     | Crude extract | -      | - | - | 60 µl        | >10 mm        | - | [18] |
|                          |                                     | Crude extract | -      | - | - | 60 µl        | >10 mm        | - | [18] |
|                          |                                     | Crude extract | -      | - | - | 60 µl        | >10 mm        | - | [18] |
|                          |                                     | Crude extract | -      | - | - | 60 µl        | >10 mm        | - | [18] |
|                          | <i>Rhodomela confervoides</i>       | Dry powder    | Summer | - | - | Disc thallus | 2 mm          | - | [2]  |
|                          |                                     | Dry powder    | Autumn | - | - | Disc thallus | 1,5 mm        | - | [2]  |

|                          |                                 |               |        |                                         |                                                                               |              |            |                                          |      |
|--------------------------|---------------------------------|---------------|--------|-----------------------------------------|-------------------------------------------------------------------------------|--------------|------------|------------------------------------------|------|
|                          | <i>Saccharina latissima</i>     | Dry powder    | Winter | -                                       | -                                                                             | Disc thallus | 1,5 mm     | -                                        | [2]  |
|                          |                                 | Dry powder    | Spring | -                                       | -                                                                             | Disc thallus | 5,5 mm     | -                                        | [2]  |
|                          |                                 | Dry powder    | Winter | -                                       | -                                                                             | Disc thallus | 8,5 mm     | -                                        | [2]  |
|                          | <i>Sargassum desfontainesii</i> | Ethyl acetate | Autumn | -                                       | -                                                                             | 5 µL         | 10 mm      | -                                        | [9]  |
|                          |                                 | Ethyl acetate | Winter | -                                       | -                                                                             | 5 µL         | 8 mm       | -                                        | [9]  |
|                          |                                 | Methanol      | Autumn | -                                       | -                                                                             | 5 µL         | 13 mm      | -                                        | [9]  |
|                          |                                 | Methanol      | Winter | -                                       | -                                                                             | 5 µL         | 11 mm      | -                                        | [9]  |
|                          | <i>Sargassum filipendula</i>    | Chloroform    | -      | -                                       | -                                                                             | 20 µL        | 7.7±0.6 mm | -                                        | [5]  |
|                          |                                 | Ethyl acetate | -      | -                                       | -                                                                             | 100 µL       | 0.38       | Data of inhibition not specified (units) | [4]  |
|                          | <i>Sargassum hystrix</i>        | Ethyl acetate | -      | -                                       | -                                                                             | 100 µL       | 0.36       | Data of inhibition not specified (units) | [4]  |
|                          | <i>Sargassum lanceolatum</i>    | Ethanol       | -      | -                                       | -                                                                             | 2 mg/disc    | 8 mm       | -                                        | [12] |
|                          |                                 | Ethanol       | -      | -                                       | -                                                                             | 4 mg/disc    | 10 mm      | -                                        | [12] |
|                          |                                 | Ethanol       | -      | -                                       | -                                                                             | 6 mg/disc    | 12 mm      | -                                        | [12] |
|                          | <i>Sargassum polycystum</i>     | Acetone       |        | Tannins, steroids.                      | Tannins, flavonoids, terpenoids, cardiac glycosides, phlobatannins, steroids. | -            | 10         | Graphical data (no units)                | [19] |
|                          |                                 | Ethanol       |        | Steroids.                               | Flavonoids, terpenoids, cardiac glycosides, steroids.                         | -            | 8          | Graphical data (no units)                | [19] |
|                          | <i>Sargassum polycystum</i>     | Water         | -      | -                                       | Phenols, amino acids, proteins.                                               | -            | 5          | Graphical data (no units)                | [19] |
|                          | <i>Sargassum muticum</i>        | Methanol      | -      | Phenolic compounds (mainly flavonoids). | -                                                                             | 300 mg/mL    | 19.66 mm   | -                                        | [20] |
|                          |                                 | Water         | -      | -                                       | -                                                                             | 300 mg/mL    | 8.67 mm    |                                          | [20] |
|                          | <i>Sargassum</i> sp.            | Methanol      | -      | -                                       | -                                                                             | 0.1 mL       | 2-3 mm     | -                                        | [16] |
| <i>Bacillus subtilis</i> | <i>Sargassum</i> sp.            | Hexane        | -      | -                                       | -                                                                             | 0.1 mL       | 2-3 mm     | -                                        | [16] |

|                             |                           |   |                                                                                                         |   |                |             |                                                                  |      |
|-----------------------------|---------------------------|---|---------------------------------------------------------------------------------------------------------|---|----------------|-------------|------------------------------------------------------------------|------|
| <i>Sargassum tenerrimum</i> | Aqueous (gel-like liquid) | - | Tannins, flavonoids, alkaloids, steroids, saponins, phlorotannins and terpenoids.                       | - | 40 µg/mL       | 4 mm        | -                                                                | [17] |
|                             | Aqueous (gel-like liquid) | - | Tannins, flavonoids, alkaloids, steroids, saponins, phlorotannins and terpenoids.                       | - | 60 µg/mL       | 5 mm        | -                                                                | [17] |
|                             | Aqueous (gel-like liquid) | - | Tannins, flavonoids, alkaloids, steroids, saponins, phlorotannins and terpenoids.                       | - | 80 µg/mL       | 6 mm        | -                                                                | [17] |
|                             | Aqueous (gel-like liquid) | - | Tannins, flavonoids, alkaloids, steroids, saponins, phlorotannins and terpenoids.                       | - | 100 µg/mL      | 9 mm        | -                                                                | [17] |
|                             | Methanol                  | - | Amino acids, alkaloids, carbohydrates, saponins, sterols, terpenoids, proteins, and phenolic compounds. | - | -              | 12 mm       | Graphical data                                                   | [21] |
|                             | Methanol                  | - | Cholest-5-en-3-ol, 24-propylidene-, (3á)-; 1,2-Benzenedicarboxylic acid, diisooctyl                     | - | Not specified. | 19.3±1.2 mm | 1,2-benzenedicarboxylic acid, diisooctyl ester, 1-docosene, 1,2- | [22] |



|                          |                          |                 |   |                                                                                                                                                                                                                                                                                              |   |                |             |                                                                                                                                                                                                          |          |
|--------------------------|--------------------------|-----------------|---|----------------------------------------------------------------------------------------------------------------------------------------------------------------------------------------------------------------------------------------------------------------------------------------------|---|----------------|-------------|----------------------------------------------------------------------------------------------------------------------------------------------------------------------------------------------------------|----------|
| <i>Bacillus subtilis</i> |                          |                 |   | ester;<br>Hentriacontane;<br>1-Docosene; 1-<br>Nonadecene; 1-<br>Hexadecanol; 1,2-<br>Benzenediol;<br>Benzoic acid.                                                                                                                                                                          |   |                |             | benzenediol and<br>benzoic acid are<br>indicated as the<br>responsible<br>compounds for<br>the antibacterial<br>activity.                                                                                |          |
|                          |                          | Petroleum ether | - | Benzoic acid, 3,5-<br>dicyclohexyl-4-<br>hydroxy-, methyl<br>ester;<br>Isomethadone;<br>Cholesterol;<br>Squalene; 9-<br>Hexadecenoic<br>acid, eicosyl ester,<br>(Z)-; 17-<br>Pentatriacontene;<br>Dasycarpidan-1-<br>methanol, acetate<br>(ester);<br>Hexadecanoic<br>acid, methyl<br>ester. | - | Not specified. | 16.6±2.5 mm | Hexadecenoic<br>acid, methyl<br>ester, 17-<br>pentatriaconten<br>e, dasycarpian-1-<br>methanol, and<br>acetate are<br>indicated as the<br>responsible<br>compounds for<br>the antibacterial<br>activity. | [22]     |
|                          | <i>Sargassum wightii</i> | Water           | - | -                                                                                                                                                                                                                                                                                            | - | 5 µg           | 6 mm        | -                                                                                                                                                                                                        | [23]     |
|                          | <i>Sargassum wightii</i> | Water           | - | -                                                                                                                                                                                                                                                                                            | - | 10 µg          | 7 mm        | -                                                                                                                                                                                                        | [23]     |
|                          |                          | Water           | - | -                                                                                                                                                                                                                                                                                            | - | 15 µg          | 9 mm        | -                                                                                                                                                                                                        | [23]     |
|                          |                          | Acetone         | - | Steroids,<br>terpenoids,<br>glycosides,<br>alkaloids,<br>flavonoids,<br>tannins and<br>saponins                                                                                                                                                                                              | - | -              | 15±1.4 mm   | -                                                                                                                                                                                                        | [24][24] |
|                          |                          | Diethyl ether   | - | Steroids,<br>terpenoids,<br>glycosides,<br>flavonoids and<br>saponins                                                                                                                                                                                                                        | - | -              | 14±1.2 mm   | -                                                                                                                                                                                                        | [24]     |

|                          |                                     |                  |                                            |                                                                                  |   |                                  |               |                |      |
|--------------------------|-------------------------------------|------------------|--------------------------------------------|----------------------------------------------------------------------------------|---|----------------------------------|---------------|----------------|------|
|                          |                                     | Methanol         | -                                          | Steroids,<br>terpenoids,<br>alkaloids,<br>flavonoids,<br>tannins and<br>saponins | - | -                                | 12.3±0.2 mm   | -              | [24] |
|                          |                                     | Hexane           | -                                          | -                                                                                | - | 1.25 mg/disc                     | 8.33±0.58 mm  | -              | [8]  |
|                          |                                     | Hexane           | -                                          | -                                                                                | - | 2.5 mg/disc                      | 10.33±0.58 mm | -              | [8]  |
|                          |                                     | Hexane           | -                                          | -                                                                                | - | 5 mg/disc                        | 10.67±0.58 mm | -              | [8]  |
|                          |                                     | Ethyl acetate    | -                                          | -                                                                                | - | 1.25 mg/disc                     | 8.67±0.58 mm  | -              | [8]  |
|                          |                                     | Ethyl acetate    | -                                          | -                                                                                | - | 2.5 mg/disc                      | 10.33±0.58 mm | -              | [8]  |
|                          |                                     | Ethyl acetate    | -                                          | -                                                                                | - | 5 mg/disc                        | 11.33±0.58 mm | -              | [8]  |
|                          |                                     | Acetone          | -                                          | -                                                                                | - | 1.25 mg/disc                     | 9.33±0.58 mm  | -              | [8]  |
|                          |                                     | Acetone          | -                                          | -                                                                                | - | 2.5 mg/disc                      | 10.00±0.00 mm | -              | [8]  |
|                          |                                     | Acetone          | -                                          | -                                                                                | - | 5 mg/disc                        | 11.33±0.58 mm | -              | [8]  |
|                          | <i>Sphondylothamnion multifidum</i> | Dry powder       | Summer                                     | -                                                                                | - | Disc thallus                     | 16 mm         | -              | [2]  |
|                          |                                     | Dry powder       | Autumn                                     | -                                                                                | - | Disc thallus                     | 16,5 mm       | -              | [2]  |
|                          | <i>Styopodium zonale</i>            | <i>n</i> -hexane | Autumn                                     | -                                                                                | - | 5 µL                             | 11 mm         | -              | [9]  |
|                          |                                     | Ethyl acetate    | Autumn                                     | -                                                                                | - | 5 µL                             | 15 mm         | -              | [9]  |
|                          |                                     | Ethyl acetate    | Winter                                     | -                                                                                | - | 5 µL                             | 12 mm         | -              | [9]  |
|                          | <i>Styopodium zonale</i>            | Methanol         | Autumn                                     | -                                                                                | - | 5 µL                             | 13 mm         | -              | [9]  |
|                          | <i>Symphyocodiella parasitica</i>   | -                | Summer                                     | -                                                                                | - | Disc thallus                     | 2 mm          | -              | [2]  |
| <i>Bacillus subtilis</i> | <i>Turbinaria ornata</i>            | Methanol         | -                                          | -                                                                                | - | 0.1 mL                           | 4-7 mm        | -              | [16] |
|                          | <i>Udotea occidentalis</i>          | Ethanol          | -                                          | -                                                                                | - | 20 µL                            | 12.0±1.0 mm   | -              | [5]  |
|                          |                                     | Chloroform       | -                                          | -                                                                                | - | 20 µL                            | 14.0±0.0 mm   | -              | [5]  |
|                          | <i>Ulva lactuca</i>                 | Dry powder       | Winter                                     | -                                                                                | - | Disc thallus                     | 4 mm          | -              | [2]  |
|                          |                                     | Acetone          | Septembre<br>station 1<br>Distal portion   | -                                                                                | - | 100 µL (200 mg<br>of dry weight) | 5-10 mm       | Graphical data | [6]  |
|                          |                                     | Acetone          | Septembre<br>station 1<br>Proximal portion | -                                                                                | - | 100 µL (200 mg<br>of dry weight) | 5-10 mm       | Graphical data | [6]  |
|                          |                                     | Acetone          | April<br>station 1<br>Distal portion       | -                                                                                | - | 100 µL (200 mg<br>of dry weight) | 5-10 mm       | Graphical data | [6]  |

|                          |                     |          |                                      |   |   |                               |          |                                                                                                                                                                           |      |
|--------------------------|---------------------|----------|--------------------------------------|---|---|-------------------------------|----------|---------------------------------------------------------------------------------------------------------------------------------------------------------------------------|------|
|                          |                     | Acetone  | April station 1 Proximal portion     | - | - | 100 µL (200 mg of dry weight) | 0-5 mm   | Graphical data                                                                                                                                                            | [6]  |
|                          |                     | Acetone  | April station 2 Distal portion       | - | - | 100 µL (200 mg of dry weight) | 15 mm    | Graphical data                                                                                                                                                            | [6]  |
|                          |                     | Acetone  | April station 2 Proximal portion     | - | - | 100 µL (200 mg of dry weight) | 5 mm     | Graphical data                                                                                                                                                            | [6]  |
|                          |                     | Ethanol  | Septembre station 1 Distal portion   | - | - | 100 µL (200 mg of dry weight) | 15-20 mm | Graphical data                                                                                                                                                            | [6]  |
|                          |                     | Ethanol  | Septembre station 1 Proximal portion | - | - | 100 µL (200 mg of dry weight) | 5-10 mm  | Graphical data                                                                                                                                                            | [6]  |
|                          |                     | Ethanol  | April station 1 Distal portion       | - | - | 100 µL (200 mg of dry weight) | 0-5 mm   | Graphical data                                                                                                                                                            | [6]  |
|                          |                     | Ethanol  | April station 1 Proximal portion     | - | - | 100 µL (200 mg of dry weight) | 0-5 mm   | Graphical data                                                                                                                                                            | [6]  |
|                          |                     | Ethanol  | April station 2 Distal portion       | - | - | 100 µL (200 mg of dry weight) | 5 mm     | Graphical data                                                                                                                                                            | [6]  |
|                          | <i>Ulva lactuca</i> | Ethanol  | April station 2 Proximal portion     | - | - | 100 µL (200 mg of dry weight) | 5 mm     | Graphical data                                                                                                                                                            | [6]  |
| <i>Bacillus subtilis</i> | <i>Ulva linza</i>   | Methanol | -                                    | - | - | 750 µg/mL (extract in DMSO)   | 11 mm    | The antibacterial activity in algae have been reported in bromophenols, carbonyls, halogenated aliphatic compounds, terpenes, isoprenylated and brominated hydroquinones, | [13] |

|                          |                                 |                  |        |   |   |                                    |         |                                                                                                                                                                                                                                              |      |
|--------------------------|---------------------------------|------------------|--------|---|---|------------------------------------|---------|----------------------------------------------------------------------------------------------------------------------------------------------------------------------------------------------------------------------------------------------|------|
|                          |                                 |                  |        |   |   |                                    |         | as well as<br>phlorotannins                                                                                                                                                                                                                  |      |
|                          |                                 | Methanol         | -      | - | - | 1000 µg/mL<br>(extract in<br>DMSO) | 14 mm   | The antibacterial<br>activity in algae<br>have been<br>reported in<br>bromophenols,<br>carbonyls,<br>halogenated<br>aliphatic<br>compounds,<br>terpenes,<br>isoprenylated<br>and brominated<br>hydroquinones,<br>as well as<br>phlorotannins | [13] |
| <i>Bacillus subtilis</i> | <i>Ulva rigida</i>              | <i>n</i> -hexane | Winter | - | - | 5 µL                               | 10 mm   | -                                                                                                                                                                                                                                            | [9]  |
|                          |                                 | Methanol         | Autumn | - | - | 5 µL                               | 13 mm   | -                                                                                                                                                                                                                                            | [9]  |
|                          |                                 | Methanol         | Winter | - | - | 5 µL                               | 18 mm   | -                                                                                                                                                                                                                                            | [9]  |
|                          | <i>Vertebrata<br/>byssoides</i> | Dry powder       | Spring | - | - | Disc thallus                       | 9,5 mm  | -                                                                                                                                                                                                                                            | [2]  |
|                          |                                 | Dry powder       | Summer | - | - | Disc thallus                       | 6 mm    | -                                                                                                                                                                                                                                            | [2]  |
|                          | <i>Vertebrata<br/>byssoides</i> | Dry powder       | Autumn | - | - | Disc thallus                       | 6 mm    | -                                                                                                                                                                                                                                            | [2]  |
|                          | <i>Vertebrata fucoides</i>      | Dry powder       | Spring | - | - | Disc thallus                       | 8 mm    | -                                                                                                                                                                                                                                            | [2]  |
|                          | <i>Vertebrata fucoides</i>      | Dry powder       | Summer | - | - | Disc thallus                       | 9 mm    | -                                                                                                                                                                                                                                            | [2]  |
|                          |                                 | Dry powder       | Autumn | - | - | Disc thallus                       | 8,5 mm  | -                                                                                                                                                                                                                                            | [2]  |
|                          |                                 | Dry powder       | Winter | - | - | Disc thallus                       | 9 mm    | -                                                                                                                                                                                                                                            | [2]  |
| <i>Bacillus subtilis</i> | <i>Vertebrata lanosa</i>        | Dry powder       | Spring | - | - | Disc thallus                       | 15 mm   | -                                                                                                                                                                                                                                            | [2]  |
|                          |                                 | Dry powder       | Summer | - | - | Disc thallus                       | 15,5 mm | -                                                                                                                                                                                                                                            | [2]  |
|                          |                                 | Dry powder       | Autumn | - | - | Disc thallus                       | 15,5 mm | -                                                                                                                                                                                                                                            | [2]  |
|                          | <i>Vertebrata lanosa</i>        | Dry powder       | Winter | - | - | Disc thallus                       | 15,5 mm | -                                                                                                                                                                                                                                            | [2]  |
|                          |                                 | Dry powder       | Spring | - | - | Disc thallus                       | 9 mm    | -                                                                                                                                                                                                                                            | [2]  |
|                          |                                 | Dry powder       | Summer | - | - | Disc thallus                       | 8,5 mm  | -                                                                                                                                                                                                                                            | [2]  |
|                          | <i>Vertebrata nigra</i>         | Dry powder       | Autumn | - | - | Disc thallus                       | 9 mm    | -                                                                                                                                                                                                                                            | [2]  |
|                          |                                 | Dry powder       | Winter | - | - | Disc thallus                       | 9 mm    | -                                                                                                                                                                                                                                            | [2]  |
|                          |                                 | Dry powder       | Spring | - | - | Disc thallus                       | 2,5 mm  | -                                                                                                                                                                                                                                            | [2]  |
|                          |                                 | Dry powder       | Spring | - | - | Disc thallus                       | 2,5 mm  | -                                                                                                                                                                                                                                            | [2]  |

|                                   |                                     |               |        |   |   |              |               |                                            |      |
|-----------------------------------|-------------------------------------|---------------|--------|---|---|--------------|---------------|--------------------------------------------|------|
|                                   | <i>Vertebrata thuyoides</i>         | Dry powder    | Summer | - | - | Disc thallus | 3,5 mm        | -                                          | [2]  |
|                                   |                                     | Dry powder    | Autumn | - | - | Disc thallus | 4 mm          | -                                          | [2]  |
|                                   |                                     | Dry powder    | Winter | - | - | Disc thallus | 3 mm          | -                                          | [2]  |
|                                   | <i>Yuzurua poiteau</i>              | Ethanol       | -      | - | - | 20 µL        | 8.0±0.0 mm    | -                                          | [5]  |
|                                   |                                     | Chloroform    | -      | - | - | 20 µL        | 14.0±2.0 mm   | -                                          | [5]  |
| <i>Corynebacterium diptheriae</i> | <i>Codium shameelii</i>             | Methanol      | -      | - | - | 2 µg/mL      | 13            | Species analysed as human/animal pathogens | [10] |
|                                   | <i>Colpomenia sinuosa</i>           | Methanol      | -      | - | - | 2 µg/mL      | 14            | Species analysed as human/animal pathogens | [10] |
|                                   | <i>Dictyota hauckiana</i>           | Methanol      | -      | - | - | 2 µg/mL      | 11            | Species analysed as human/animal pathogens | [10] |
|                                   | <i>Iyengaria stellata</i>           | Methanol      | -      | - | - | 2 µg/mL      | 15            | Species analysed as human/animal pathogens | [10] |
|                                   | <i>Polycladia indica</i>            | Methanol      | -      | - | - | 2 µg/mL      | 13            | Species analysed as human/animal pathogens | [10] |
| <i>Corynebacterium diptheriae</i> | <i>Stoechospermum polypodioides</i> | Methanol      | -      | - | - | 2 µg/mL      | 12            | Species analysed as human/animal pathogens | [10] |
| <i>Erwinia amylovora</i>          | <i>Chaetomorpha linum</i>           | Ethyl acetate | -      | - | - | 1.25 mg/disc | 10.33±0.58 mm | -                                          | [8]  |
|                                   |                                     | Ethyl acetate | -      | - | - | 2.5 mg/disc  | 11.33±0.58 mm | -                                          | [8]  |
|                                   |                                     | Ethyl acetate | -      | - | - | 5 mg/disc    | 12.00±1.00 mm | -                                          | [8]  |
|                                   |                                     | Acetone       | -      | - | - | 1.25 mg/disc | 12.67±0.58 mm | -                                          | [8]  |
|                                   |                                     | Acetone       | -      | - | - | 2.5 mg/disc  | 14.67±0.58 mm | -                                          | [8]  |
|                                   |                                     | Acetone       | -      | - | - | 5 mg/disc    | 16.67±0.58 mm | -                                          | [8]  |
|                                   | <i>Padina gymnospora</i>            | Hexane        | -      | - | - | 2.5 mg/disc  | 6.33±0.58 mm  | -                                          | [8]  |
|                                   |                                     | Hexane        | -      | - | - | 5 mg/disc    | 7.33±0.58 mm  | -                                          | [8]  |
|                                   |                                     | Ethyl acetate | -      | - | - | 2.5 mg/disc  | 7.33±0.58 mm  | -                                          | [8]  |

|                             |                                                       |                                   |   |   |   |              |               |   |      |
|-----------------------------|-------------------------------------------------------|-----------------------------------|---|---|---|--------------|---------------|---|------|
|                             | <i>Sargassum wightii</i>                              | Ethyl acetate                     | - | - | - | 5 mg/disc    | 8.33±0.58 mm  | - | [8]  |
|                             |                                                       | Acetone                           | - | - | - | 1.25 mg/disc | 9.00±0.00 mm  | - | [8]  |
|                             |                                                       | Acetone                           | - | - | - | 2.5 mg/disc  | 10.67±0.58 mm | - | [8]  |
|                             |                                                       | Acetone                           | - | - | - | 5 mg/disc    | 15.33±0.58 mm | - | [8]  |
|                             |                                                       | Hexane                            | - | - | - | 1.25 mg/disc | 8.33±0.58 mm  | - | [8]  |
|                             |                                                       | Hexane                            | - | - | - | 2.5 mg/disc  | 11.00±0.00 mm | - | [8]  |
|                             |                                                       | Hexane                            | - | - | - | 5 mg/disc    | 12.33±0.58 mm | - | [8]  |
|                             |                                                       | Ethyl acetate                     | - | - | - | 2.5 mg/disc  | 8.67±0.58 mm  | - | [8]  |
|                             |                                                       | Ethyl acetate                     | - | - | - | 5 mg/disc    | 10.33±0.58 mm | - | [8]  |
|                             |                                                       | Acetone                           | - | - | - | 1.25 mg/disc | 11.33±0.58 mm | - | [8]  |
|                             |                                                       | Acetone                           | - | - | - | 2.5 mg/disc  | 12.33±0.58 mm | - | [8]  |
|                             |                                                       | Acetone                           | - | - | - | 5 mg/disc    | 13.33±0.58 mm | - | [8]  |
|                             |                                                       | Methanol                          | - | - | - | 5 mg/disc    | 10.00±0.00 mm | - | [8]  |
| <i>Erwinia chrysanthemi</i> | <i>Halopithys incurva</i>                             | Methanol                          | - | - | - | -            | 16±1.41 mm    | - | [25] |
|                             |                                                       | Dichloromethane                   | - | - | - | -            | 8±2.12 mm     | - | [25] |
|                             |                                                       | Dichloromethane :methanol (50:50) | - | - | - | -            | 12±1.87 mm    | - | [25] |
|                             | <i>Bifurcaria bifurcata</i>                           | Methanol                          | - | - | - | -            | 12±1.63 mm    | - | [25] |
|                             |                                                       | Dichloromethane                   | - | - | - | -            | 18±2.12 mm    | - | [25] |
|                             |                                                       | Dichloromethane :methanol (50:50) | - | - | - | -            | 15±3.67 mm    | - | [25] |
| <i>Erwinia chrysanthemi</i> | <i>Codium decorticans</i>                             | Methanol                          | - | - | - | -            | 8±2.94 mm     | - | [25] |
|                             |                                                       | Dichloromethane                   | - | - | - | -            | 10±0.71 mm    | - | [25] |
|                             |                                                       | Dichloromethane :methanol (50:50) | - | - | - | -            | 8±4.47 mm     | - | [25] |
|                             | <i>Cystoseira humilis</i> var. <i>myriophylloides</i> | Methanol                          | - | - | - | -            | 9±2.00 mm     | - | [25] |
|                             |                                                       | Dichloromethane                   | - | - | - | -            | 10±1.87 mm    | - | [25] |
|                             |                                                       | Dichloromethane :methanol (50:50) | - | - | - | -            | 7±2.12 mm     | - | [25] |
|                             | <i>Ellisolandia elongata</i>                          | Methanol                          | - | - | - | -            | 18±1.41 mm    | - | [25] |
|                             |                                                       | Dichloromethane                   | - | - | - | -            | 12±1.73 mm    | - | [25] |

|                             |                                |                                   |   |   |   |   |            |   |      |
|-----------------------------|--------------------------------|-----------------------------------|---|---|---|---|------------|---|------|
|                             | <i>Ericaria selaginoides</i>   | Dichloromethane :methanol (50:50) | - | - | - | - | 16±1.22 mm | - | [25] |
|                             |                                | Methanol                          | - | - | - | - | 8±2.31 mm  | - | [25] |
|                             |                                | Dichloromethane                   | - | - | - | - | 8±3.54 mm  | - | [25] |
|                             |                                | Dichloromethane :methanol (50:50) | - | - | - | - | 8±2.55 mm  | - | [25] |
|                             | <i>Fucus spiralis</i>          | Methanol                          | - | - | - | - | 10±0.82 mm | - | [25] |
|                             |                                | Dichloromethane                   | - | - | - | - | 8±3.61 mm  | - | [25] |
|                             |                                | Dichloromethane :methanol (50:50) | - | - | - | - | 12±1.87 mm | - | [25] |
|                             | <i>Gelidium corneum</i>        | Methanol                          | - | - | - | - | 9±3.56 mm  | - | [25] |
|                             |                                | Dichloromethane                   | - | - | - | - | 9±3.08 mm  | - | [25] |
|                             |                                | Dichloromethane :methanol (50:50) | - | - | - | - | 12±1.87 mm | - | [25] |
|                             | <i>Gelidium sp</i>             | Methanol                          | - | - | - | - | 11±1.15 mm | - | [25] |
|                             |                                | Dichloromethane                   | - | - | - | - | 10±1.22 mm | - | [25] |
|                             |                                | Dichloromethane :methanol (50:50) | - | - | - | - | 10±1.22 mm | - | [25] |
|                             | <i>Gracilaria cervicornis</i>  | Methanol                          | - | - | - | - | 8±2.94 mm  | - | [25] |
|                             |                                | Dichloromethane                   | - | - | - | - | 11±1.00 mm | - | [25] |
| <i>Erwinia chrysanthemi</i> | <i>Gracilaria cervicornis</i>  | Dichloromethane :methanol (50:50) | - | - | - | - | 17±1.58 mm | - | [25] |
|                             | <i>Gymnogongrus crenulatus</i> | Methanol                          | - | - | - | - | 10±0.82 mm | - | [25] |
|                             |                                | Dichloromethane                   | - | - | - | - | 12±1.87 mm | - | [25] |
|                             |                                | Dichloromethane :methanol (50:50) | - | - | - | - | 8±4.47 mm  | - | [25] |
|                             | <i>Laminaria digitata</i>      | Methanol                          | - | - | - | - | 8±2.94 mm  | - | [25] |
|                             |                                | Dichloromethane                   | - | - | - | - | 13±1.58 mm | - | [25] |
|                             |                                | Dichloromethane :methanol (50:50) | - | - | - | - | 15±3.08 mm | - | [25] |

|                         |                                |                                   |   |                                                        |   |           |              |   |      |
|-------------------------|--------------------------------|-----------------------------------|---|--------------------------------------------------------|---|-----------|--------------|---|------|
|                         | <i>Osmundea pinnatifida</i>    | Methanol                          | - | -                                                      | - | -         | 8±2.94 mm    | - | [25] |
|                         |                                | Dichloromethane                   | - | -                                                      | - | -         | 8±4.74 mm    | - | [25] |
|                         |                                | Dichloromethane :methanol (50:50) | - | -                                                      | - | -         | 8±4.06 mm    | - | [25] |
|                         | <i>Plocamium cartilagineum</i> | Methanol                          | - | -                                                      | - | -         | 14±1.15 mm   | - | [25] |
|                         |                                | Dichloromethane                   | - | -                                                      | - | -         | 11±2.24 mm   | - | [25] |
|                         |                                | Dichloromethane :methanol (50:50) | - | -                                                      | - | -         | 11±2.24 mm   | - | [25] |
|                         | <i>Sargassum vulgare</i>       | Methanol                          | - | -                                                      | - | -         | 8±2.83 mm    | - | [25] |
|                         |                                | Dichloromethane                   | - | -                                                      | - | -         | 10±1.22 mm   | - | [25] |
|                         |                                | Dichloromethane :methanol (50:50) | - | -                                                      | - | -         | 12±1.41 mm   | - | [25] |
|                         | <i>Ulva intestinalis</i>       | Methanol                          | - | -                                                      | - | -         | 9.3±0.58 mm  | - | [25] |
|                         |                                | Dichloromethane                   | - | -                                                      | - | -         | 9±1.73 mm    | - | [25] |
|                         |                                | Dichloromethane :methanol (50:50) | - | -                                                      | - | -         | 5.33±4.73 mm | - | [25] |
|                         | <i>Ulva sp.</i>                | Methanol                          | - | -                                                      | - | -         | 10±0.82 mm   | - | [25] |
|                         |                                | Dichloromethane                   | - | -                                                      | - | -         | 10±1.58 mm   | - | [25] |
|                         |                                | Dichloromethane :methanol (50:50) | - | -                                                      | - | -         | 10±1.22 mm   | - | [25] |
| <i>Escherichia coli</i> | <i>Kappaphycus alvarezii</i>   | Aqueous (gel-like liquid)         | - | Tannins, flavonoids, alkaloids, steroids and saponins. | - | 40 µg/mL  | -            | - | [17] |
|                         |                                | Aqueous (gel-like liquid)         | - | Tannins, flavonoids, alkaloids, steroids and saponins. | - | 60 µg/mL  | 4 mm         | - | [17] |
|                         |                                | Aqueous (gel-like liquid)         | - | Tannins, flavonoids, alkaloids, steroids and saponins. | - | 80 µg/mL  | 2 mm         | - | [17] |
|                         |                                | Aqueous (gel-like liquid)         | - | Tannins, flavonoids,                                   | - | 100 µg/mL | 6 mm         | - | [17] |



|  |                             |                           |   |                                                                                              |   |                |             |                                                                  |      |
|--|-----------------------------|---------------------------|---|----------------------------------------------------------------------------------------------|---|----------------|-------------|------------------------------------------------------------------|------|
|  |                             |                           |   | alkaloids, steroids and saponins.                                                            |   |                |             |                                                                  |      |
|  | <i>Sargassum muticum</i>    | Methanol                  | - | Phenolic compounds (mainly flavonoids).                                                      | - | 300 mg/mL      | 24.33 mm    | -                                                                | [20] |
|  |                             | Water                     | - | -                                                                                            | - | 300 mg/mL      | 11.33 mm    | -                                                                | [20] |
|  | <i>Sargassum tenerrimum</i> | Aqueous (gel-like liquid) | - | Tannins, flavonoids, alkaloids, steroids, saponins, phlorotannins and terpenoids.            | - | 40 µg/mL       | 2 mm        | -                                                                | [17] |
|  |                             | Aqueous (gel-like liquid) | - | Tannins, flavonoids, alkaloids, steroids, saponins, phlorotannins and terpenoids.            | - | 60 µg/mL       | 7 mm        | -                                                                | [17] |
|  |                             | Aqueous (gel-like liquid) | - | Tannins, flavonoids, alkaloids, steroids, saponins, phlorotannins and terpenoids.            | - | 80 µg/mL       | 8 mm        | -                                                                | [17] |
|  |                             | Aqueous (gel-like liquid) | - | Tannins, flavonoids, alkaloids, steroids, saponins, phlorotannins and terpenoids.            | - | 100 µg/mL      | 10 mm       | -                                                                | [17] |
|  | <i>Sargassum tenerrimum</i> | Methanol                  | - | Cholest-5-en-3-ol, 24-propylidene-, (3 $\alpha$ )-; 1,2-Benzenedicarboxylic acid, diisooctyl | - | Not specified. | 20.6±1.6 mm | 1,2-benzenedicarboxylic acid, diisooctyl ester, 1-docosene, 1,2- | [22] |

|  |                                     |                                                                |   |                                                                                                                                                                                                                                                                                              |   |                |              |                                                                                                                                                                                                          |      |
|--|-------------------------------------|----------------------------------------------------------------|---|----------------------------------------------------------------------------------------------------------------------------------------------------------------------------------------------------------------------------------------------------------------------------------------------|---|----------------|--------------|----------------------------------------------------------------------------------------------------------------------------------------------------------------------------------------------------------|------|
|  |                                     |                                                                |   | ester;<br>Hentriacontane;<br>1-Docosene; 1-<br>Nonadecene; 1-<br>Hexadecanol; 1,2-<br>Benzenediol;<br>Benzoic acid.                                                                                                                                                                          |   |                |              | benzenediol and<br>benzoic acid are<br>indicated as the<br>responsible<br>compounds for<br>the antibacterial<br>activity.                                                                                |      |
|  |                                     | Petroleum ether                                                | - | Benzoic acid, 3,5-<br>dicyclohexyl-4-<br>hydroxy-, methyl<br>ester;<br>Isomethadone;<br>Cholesterol;<br>Squalene; 9-<br>Hexadecenoic<br>acid, eicosyl ester,<br>(Z)-; 17-<br>Pentatriacontene;<br>Dasycarpidan-1-<br>methanol, acetate<br>(ester);<br>Hexadecanoic<br>acid, methyl<br>ester. | - | Not specified. | 12.5±1.2 mm  | Hexadecenoic<br>acid, methyl<br>ester, 17-<br>pentatriaconten<br>e, dasycarpian-1-<br>methanol, and<br>acetate are<br>indicated as the<br>responsible<br>compounds for<br>the antibacterial<br>activity. | [22] |
|  | <i>Sargassum<br/>cristaeifolium</i> | Hexane                                                         | - | Phenol, 1-<br>nonadecene,<br>myristic acid, 9-<br>tricosene (Z)-,<br>palmitic acid, 1-<br>hexacosene and<br>oleic acid.                                                                                                                                                                      | - | 2 mg/mL        | 3.71±0.07 mm | -                                                                                                                                                                                                        | [26] |
|  | <i>Sargassum<br/>cristaeifolium</i> | Serial extraction<br>with hexane, and<br>then ethyl<br>acetate | - | Phenol, 1-<br>hexadecene,<br>myristic acid, 9-<br>tricosene (Z)-,<br>neophytadiene,<br>phytol,<br>cyclotetracosane,<br>palmitic acid, and<br>oleic acid.                                                                                                                                     | - | 2 mg/mL        | 3.54±0.07 mm | -                                                                                                                                                                                                        | [26] |

|                                  |                                |                                                                          |   |                                                                                                                                                                                         |   |           |              |   |      |
|----------------------------------|--------------------------------|--------------------------------------------------------------------------|---|-----------------------------------------------------------------------------------------------------------------------------------------------------------------------------------------|---|-----------|--------------|---|------|
|                                  | <i>Sargassum cristaefolium</i> | Serial extraction with hexane, ethyl acetate and methanol, respectively. | - | Phenol, methyl dihydrojasmonate, 3-azepan-1-yl-benzo[d]isothiazole 1,1-dioxide, hexyl cinnamic aldehyde, 9-tricosene(Z)-, palmitic acid, 1-hexacosene, hexatriacontane, and 1-docosene. | - | 2 mg/mL   | 5.42±0.14 mm | - | [26] |
| <i>Lactobacillus acidophilus</i> | <i>Kappaphycus alvarezii</i>   | Aqueous (gel-like liquid)                                                | - | Tannins, flavonoids, alkaloids, steroids and saponins.                                                                                                                                  | - | 40 µg/mL  | -            | - | [17] |
|                                  |                                | Aqueous (gel-like liquid)                                                | - | Tannins, flavonoids, alkaloids, steroids and saponins.                                                                                                                                  | - | 60 µg/mL  | 1 mm         | - | [17] |
|                                  |                                | Aqueous (gel-like liquid)                                                | - | Tannins, flavonoids, alkaloids, steroids and saponins.                                                                                                                                  | - | 80 µg/mL  | 2 mm         | - | [17] |
|                                  |                                | Aqueous (gel-like liquid)                                                | - | Tannins, flavonoids, alkaloids, steroids and saponins.                                                                                                                                  | - | 100 µg/mL | 4 mm         | - | [17] |
|                                  | <i>Sargassum tenerrimum</i>    | Aqueous (gel-like liquid)                                                | - | Tannins, flavonoids, alkaloids, steroids, saponins, phlorotannins and terpenoids.                                                                                                       | - | 40 µg/mL  | 2 mm         | - | [17] |
|                                  |                                | Aqueous (gel-like liquid)                                                | - | Tannins, flavonoids, alkaloids, steroids,                                                                                                                                               | - | 60 µg/mL  | 3 mm         | - | [17] |

|                                      |                                  |                              |   |                                                                                                     |   |           |      |   |      |
|--------------------------------------|----------------------------------|------------------------------|---|-----------------------------------------------------------------------------------------------------|---|-----------|------|---|------|
|                                      |                                  |                              |   | saponins,<br>phlorotannins and<br>terpenoids.                                                       |   |           |      |   |      |
|                                      |                                  | Aqueous (gel-like<br>liquid) | - | Tannins,<br>flavonoids,<br>alkaloids,<br>steroids,<br>saponins,<br>phlorotannins and<br>terpenoids. | - | 80 µg/mL  | 5 mm | - | [17] |
| <i>Lactobacillus<br/>acidophilus</i> | <i>Sargassum<br/>tenerrimum</i>  | Aqueous (gel-like<br>liquid) | - | Tannins,<br>flavonoids,<br>alkaloids,<br>steroids,<br>saponins,<br>phlorotannins and<br>terpenoids. | - | 100 µg/mL | 7 mm | - | [17] |
| <i>Proteus mirabilis</i>             | <i>Kappaphycus<br/>alvarezii</i> | Aqueous (gel-like<br>liquid) | - | Tannins,<br>flavonoids,<br>alkaloids, steroids<br>and saponins.                                     | - | 40 µg/mL  | 2 mm | - | [17] |
|                                      |                                  | Aqueous (gel-like<br>liquid) | - | Tannins,<br>flavonoids,<br>alkaloids, steroids<br>and saponins.                                     | - | 60 µg/mL  | 6 mm | - | [17] |
|                                      |                                  | Aqueous (gel-like<br>liquid) | - | Tannins,<br>flavonoids,<br>alkaloids, steroids<br>and saponins.                                     | - | 80 µg/mL  | 8 mm | - | [17] |
|                                      |                                  | Aqueous (gel-like<br>liquid) | - | Tannins,<br>flavonoids,<br>alkaloids, steroids<br>and saponins.                                     | - | 100 µg/mL | 7 mm | - | [17] |
|                                      | <i>Sargassum<br/>tenerrimum</i>  | Aqueous (gel-like<br>liquid) | - | Tannins,<br>flavonoids,<br>alkaloids,<br>steroids,<br>saponins,<br>phlorotannins and<br>terpenoids. | - | 40 µg/mL  | 7 mm | - | [17] |

|                               |                               |                           |   |                                                                                   |   |                               |                |                                               |      |
|-------------------------------|-------------------------------|---------------------------|---|-----------------------------------------------------------------------------------|---|-------------------------------|----------------|-----------------------------------------------|------|
|                               |                               | Aqueous (gel-like liquid) | - | Tannins, flavonoids, alkaloids, steroids, saponins, phlorotannins and terpenoids. | - | 60 µg/mL                      | 8 mm           | -                                             | [17] |
|                               |                               | Aqueous (gel-like liquid) | - | Tannins, flavonoids, alkaloids, steroids, saponins, phlorotannins and terpenoids. | - | 80 µg/mL                      | 12 mm          | -                                             | [17] |
| <i>Proteus mirabilis</i>      | <i>Sargassum tenerrimum</i>   | Aqueous (gel-like liquid) | - | Tannins, flavonoids, alkaloids, steroids, saponins, phlorotannins and terpenoids. | - | 100 µg/mL                     | 9 mm           | -                                             | [17] |
| <i>Pseudomonas aeruginosa</i> | <i>Sargassum lanceolatum</i>  | Ethanol                   | - | -                                                                                 | - | 4 mg/disc                     | 8 mm           | Produced weak zone and later bacterial growth | [12] |
|                               |                               | Ethanol                   | - | -                                                                                 | - | 6 mg/disc                     | 8 mm           | Produced weak zone and later bacterial growth | [12] |
|                               | <i>Chaetomorpha antennina</i> | Petroleum ether           | - | -                                                                                 | - | 50 µg/mL (dissolved in DMSO)  | 7.3 ± 1 mm     | -                                             | [7]  |
|                               |                               | Petroleum ether           | - | -                                                                                 | - | 100 µg/mL (dissolved in DMSO) | 11.16 ± 1.4 mm | -                                             | [7]  |
|                               |                               | Petroleum ether           | - | -                                                                                 | - | 200 µg/mL (dissolved in DMSO) | 12.16 ± 1.3 mm | -                                             | [7]  |
|                               |                               | Petroleum ether           | - | -                                                                                 | - | 300 µg/mL (dissolved in DMSO) | 15.16 ± 1.3 mm | -                                             | [7]  |

|                               |                                         |                        |          |                     |                                      |                               |                |                                              |      |
|-------------------------------|-----------------------------------------|------------------------|----------|---------------------|--------------------------------------|-------------------------------|----------------|----------------------------------------------|------|
| <i>Pseudomonas aeruginosa</i> |                                         | Petroleum ether        | -        | -                   | -                                    | 400 µg/mL (dissolved in DMSO) | 15.83 ± 0.9 mm | -                                            | [7]  |
|                               |                                         | Petroleum ether        | -        | -                   | -                                    | 500 µg/mL (dissolved in DMSO) | 16.83 ± 0.9 mm | -                                            | [7]  |
|                               | <i>Chaetomorpha linum</i>               | Hexane                 | -        | -                   | -                                    | 2.5 mg/disc (extract)         | 7.3±0.58 mm    | -                                            | [8]  |
|                               |                                         | Hexane                 | -        | -                   | -                                    | 5 mg/disc                     | 9.67±0.58 mm   | -                                            | [8]  |
|                               | <i>Chaetomorpha sp.</i>                 | Methanol               | -        | -                   | -                                    | 50 µl, 75 µl, 100 µl          | 5 mm           | -                                            | [27] |
|                               | <i>Codium intertextum</i>               | Methanol               | (Winter) | -                   | -                                    | 5 µL                          | 10 mm          | -                                            | [9]  |
|                               | <i>Codium shameelii</i>                 | Methanol               | -        | -                   | -                                    | 2 µg/mL                       | 12             | Species analysed as human/animal pathogens   | [10] |
|                               | <i>Colpomenia sinuosa</i>               | Methanol               | -        | -                   | -                                    | 2 µg/mL                       | 13             | Species analysed as human/animal pathogens   | [10] |
|                               | <i>Dictyopteris polypodioides</i>       | Methanol               | -        | -                   | Phlorotannins present in brown algae | -                             | 15 mm          | -                                            | [28] |
|                               | <i>Dictyota cervicornis</i>             | Ethanol                | -        | -                   | -                                    | 4 mg/disc                     | 7 mm           | Produced weak zone and later bacteria grown. | [12] |
|                               |                                         | Ethanol                | -        | -                   | -                                    | 6 mg/disc                     | 8 mm           | Produced weak zone and later bacteria grown. | [12] |
|                               | <i>Dictyota dichotoma var intricata</i> | Ethanol                | -        | -                   | -                                    | 2 mg/disc                     | 9 mm           | Produced weak zone and later bacteria grown. | [12] |
|                               |                                         | Ethanol                | -        | -                   | -                                    | 4 mg/disc                     | 11 mm          | Produced weak zone and later bacteria grown. | [12] |
|                               |                                         | Ethanol                | -        | -                   | -                                    | 6 mg/disc                     | 12 mm          | Produced weak zone and later bacteria grown. | [12] |
|                               | <i>Gracilaria corticata</i>             | Methanol (Soxhlet/hot) | -        | Phenolic compounds, | Saponins, alkaloids,                 | 125 µg/ml                     | 7 mm           | The presence of tannins at low               | [29] |

|                               |                               |                           |   |                                                        |                                                                                   |           |        |                                                                                       |      |
|-------------------------------|-------------------------------|---------------------------|---|--------------------------------------------------------|-----------------------------------------------------------------------------------|-----------|--------|---------------------------------------------------------------------------------------|------|
|                               |                               |                           |   | terpenoids, steroids, sugars                           | phenols, steroids and triterpenoids and free hydroxyl groups                      |           |        | concentration and terpenoids have antimicrobial activity.                             |      |
|                               |                               | Isopropanol (Soxhlet/hot) | - | Phenols, steroids, glycosides                          | Saponins, alkaloids, phenols, steroids and triterpenoids and free hydroxyl groups | 125 µg/ml | 13 mm  | The presence of tannins at low concentration have antimicrobial activity              | [29] |
| <i>Pseudomonas aeruginosa</i> | <i>Gracilaria corticata</i>   | Benzene (Cold)            | - | Alkaloids, phenols, saponins, steroids.                | Saponins, alkaloids, phenols, steroids and triterpenoids and free hydroxyl groups | 125 µg/ml | 9 mm   | The presence of tannins at low concentration and saponins have antimicrobial activity | [29] |
|                               | <i>Halimeda tuna</i>          | Ethanol                   | - | -                                                      | -                                                                                 | 2 mg/disc | 7 mm   | Produced weak zone and later bacteria grown.                                          | [12] |
|                               |                               | Ethanol                   | - | -                                                      | -                                                                                 | 4 mg/disc | 8 mm   | Produced weak zone and later bacteria grown.                                          | [12] |
|                               |                               | Ethanol                   | - | -                                                      | -                                                                                 | 6 mg/disc | 10 mm  | Produced weak zone and later bacteria grown.                                          | [12] |
|                               | <i>Hormophysa cuneiformis</i> | Methanol                  | - | -                                                      | -                                                                                 | 0.1 mL    | 2-3 mm | -                                                                                     | [16] |
|                               | <i>Iyengaria stellata</i>     | Methanol                  | - | -                                                      | -                                                                                 | 2 µg/mL   | 12 mm  | Species analysed as human/animal pathogens                                            | [10] |
|                               | <i>Kappaphycus alvarezii</i>  | Aqueous (gel-like liquid) | - | Tannins, flavonoids, alkaloids, steroids and saponins. | -                                                                                 | 40 µg/mL  | 2 mm   | -                                                                                     | [17] |
|                               |                               | Aqueous (gel-like liquid) | - | Tannins, flavonoids, alkaloids, steroids and saponins. | -                                                                                 | 60 µg/mL  | 4 mm   | -                                                                                     | [17] |

|                               |                                   |                           |        |                                                                                                        |   |              |               |                                              |      |
|-------------------------------|-----------------------------------|---------------------------|--------|--------------------------------------------------------------------------------------------------------|---|--------------|---------------|----------------------------------------------|------|
| <i>Pseudomonas aeruginosa</i> | <i>Kappaphycus alvarezii</i>      | Aqueous (gel-like liquid) | -      | Tannins, flavonoids, alkaloids, steroids and saponins.                                                 | - | 80 µg/mL     | 7 mm          | -                                            | [17] |
|                               |                                   | Aqueous (gel-like liquid) | -      | Tannins, flavonoids, alkaloids, steroids and saponins.                                                 | - | 100 µg/mL    | 10 mm         | -                                            | [17] |
|                               | <i>Melanothamnus afaqhusainii</i> | Ethanol                   | -      | -                                                                                                      | - | 4 mg/disc    | 8 mm          | Produced weak zone and later bacteria grown. | [12] |
|                               |                                   | Ethanol                   | -      | -                                                                                                      | - | 6 mg/disc    | 8 mm          | Produced weak zone and later bacteria grown. | [12] |
|                               | <i>Padina gymnospora</i>          | Ethyl acetate             | -      | -                                                                                                      | - | 1.25 mg/disc | 7.33±0.58 mm  | -                                            | [8]  |
|                               |                                   | Ethyl acetate             | -      | -                                                                                                      | - | 2.5 mg/disc  | 9.00±0.00 mm  | -                                            | [8]  |
|                               |                                   | Ethyl acetate             | -      | -                                                                                                      | - | 5 mg/disc    | 10.33±0.58 mm | -                                            | [8]  |
|                               |                                   | Acetone                   | -      | -                                                                                                      | - | 1.25 mg/disc | 10.67±0.58 mm | -                                            | [8]  |
|                               |                                   | Acetone                   | -      | -                                                                                                      | - | 2.5 mg/disc  | 12.67±0.58 mm | -                                            | [8]  |
|                               |                                   | Acetone                   | -      | -                                                                                                      | - | 5 mg/disc    | 15.67±0.58 mm | -                                            | [8]  |
|                               | <i>Padina sp.</i>                 | Hexane                    | -      | -                                                                                                      | - | 0.1 mL       | 2-3 mm        | -                                            | [16] |
|                               | <i>Ptilophora subcostata</i>      | Crude extract             | -      | -                                                                                                      | - | 60 µl        | >10 mm        | -                                            | [18] |
|                               | <i>Sargassum desfontainesii</i>   | n-hexane                  | Autumn | -                                                                                                      | - | 5 µL         | 8 mm          | -                                            | [9]  |
|                               | <i>Sargassum polycystum</i>       | Methanol                  | -      | -                                                                                                      | - | 50 µL        | 15 mm         | -                                            | [30] |
|                               | <i>Sargassum sp.</i>              | Hexane                    | -      | -                                                                                                      | - | 0.1 mL       | 2-3 mm        | -                                            | [16] |
|                               | <i>Sargassum tenerrimum</i>       | Water                     | -      | -                                                                                                      | - | -            | 1 mm          | Graphical values                             | [21] |
|                               |                                   | Methanol                  | -      | Amino acids, alkaloids, carbohydrates, saponins, sterols, terpenoids, proteins, and phenolic compounds | - | -            | 13mm          | Graphical values                             | [21] |



|                               |                             |                           |   |                                                                                                                                                                   |   |                |                   |                                                                                                                                             |      |
|-------------------------------|-----------------------------|---------------------------|---|-------------------------------------------------------------------------------------------------------------------------------------------------------------------|---|----------------|-------------------|---------------------------------------------------------------------------------------------------------------------------------------------|------|
|                               |                             |                           |   | (flavonoids and tannins)                                                                                                                                          |   |                |                   |                                                                                                                                             |      |
| <i>Pseudomonas aeruginosa</i> | <i>Sargassum tenerrimum</i> | Aqueous (gel-like liquid) | - | Tannins, flavonoids, alkaloids, steroids, saponins, phlorotannins and terpenoids.                                                                                 | - | 40 µg/mL       | 4 mm              | -                                                                                                                                           | [17] |
|                               |                             | Aqueous (gel-like liquid) | - | Tannins, flavonoids, alkaloids, steroids, saponins, phlorotannins and terpenoids.                                                                                 | - | 60 µg/mL       | 5 mm              | -                                                                                                                                           | [17] |
|                               |                             | Aqueous (gel-like liquid) | - | Tannins, flavonoids, alkaloids, steroids, saponins, phlorotannins and terpenoids.                                                                                 | - | 80 µg/mL       | 6 mm              | -                                                                                                                                           | [17] |
|                               |                             | Aqueous (gel-like liquid) | - | Tannins, flavonoids, alkaloids, steroids, saponins, phlorotannins and terpenoids.                                                                                 | - | 100 µg/mL      | 12 mm             | -                                                                                                                                           | [17] |
|                               | <i>Sargassum tenerrimum</i> | Methanol                  | - | Cholest-5-en-3-ol, 24-propylidene-, (3 $\alpha$ )-; 1,2-Benzenedicarboxylic acid, diisooctyl ester; Hentriacontane; 1-Docosene; 1-Nonadecene; 1-Hexadecanol; 1,2- | - | Not specified. | 17.3 $\pm$ 2.3 mm | 1,2-benzenedicarboxylic acid, diisooctyl ester, 1-docosene, 1,2-benzenediol and benzoic acid are indicated as the responsible compounds for | [22] |

|                               |                             |                 |   |                                                                                                                                                                                                                                                  |   |                |             |                                                                                                                                                                       |      |
|-------------------------------|-----------------------------|-----------------|---|--------------------------------------------------------------------------------------------------------------------------------------------------------------------------------------------------------------------------------------------------|---|----------------|-------------|-----------------------------------------------------------------------------------------------------------------------------------------------------------------------|------|
|                               |                             |                 |   | Benzenediol;<br>Benzoic acid.                                                                                                                                                                                                                    |   |                |             | the antibacterial activity.                                                                                                                                           |      |
|                               | <i>Sargassum tenerrimum</i> | Petroleum ether | - | Benzoic acid, 3,5-dicyclohexyl-4-hydroxy-, methyl ester;<br>Isomethadone;<br>Cholesterol;<br>Squalene; 9-Hexadecenoic acid, eicosyl ester, (Z)-; 17-Pentatriacontene; Dasycarpidan-1-methanol, acetate (ester); Hexadecanoic acid, methyl ester. | - | Not specified. | 14.3±1.6 mm | Hexadecenoic acid, methyl ester, 17-pentatriacontene, dasycarpidan-1-methanol, and acetate are indicated as the responsible compounds for the antibacterial activity. | [22] |
|                               | <i>Sargassum wightii</i>    | Acetone         | - | Steroids, terpenoids, glycosides, alkaloids, flavonoids, tannins and saponins                                                                                                                                                                    | - | -              | 12±0.6      | -                                                                                                                                                                     | [24] |
|                               |                             | Diethyl ether   | - | Steroids, terpenoids, glycosides, flavonoids and saponins                                                                                                                                                                                        | - | -              | 10±0.2      | -                                                                                                                                                                     | [24] |
| <i>Pseudomonas aeruginosa</i> | <i>Sargassum wightii</i>    | Methanol        | - | Steroids, terpenoids, alkaloids, flavonoids, tannins and saponins                                                                                                                                                                                | - | -              | 14±0.5      | -                                                                                                                                                                     | [24] |
|                               |                             | Acetone         | - | -                                                                                                                                                                                                                                                | - | 1.25           | 9.67±0.58   | -                                                                                                                                                                     | [8]  |
|                               |                             | Acetone         | - | -                                                                                                                                                                                                                                                | - | 2.5            | 10.67±0.58  | -                                                                                                                                                                     | [8]  |
|                               |                             | Acetone         | - | -                                                                                                                                                                                                                                                | - | 5              | 11.67±0.58  | -                                                                                                                                                                     | [8]  |

|                                |                             |                    |        |                                                                                                                                                       |   |                      |              |                                                                                                                                        |      |
|--------------------------------|-----------------------------|--------------------|--------|-------------------------------------------------------------------------------------------------------------------------------------------------------|---|----------------------|--------------|----------------------------------------------------------------------------------------------------------------------------------------|------|
|                                | <i>Stoechospermum sp</i>    | Ethanol            | -      | -                                                                                                                                                     | - | 50 µl, 75 µl, 100 µl | 4 mm         |                                                                                                                                        | [31] |
|                                | <i>Stypopodium zonale</i>   | <i>n</i> -hexane   | Autumn | -                                                                                                                                                     | - | 5 µL                 | 8 mm         | -                                                                                                                                      | [9]  |
|                                | <i>Turbinaria ornata</i>    | Methanol           | -      | -                                                                                                                                                     | - | 0.1 mL               | 2-3 mm       | -                                                                                                                                      | [16] |
| <i>Pseudomonas fluorescens</i> | <i>Centroceiod sp.*</i>     | Ethanol            | -      | -                                                                                                                                                     | - | 51 µl, 75 µl, 100 µl | 7 mm         | -                                                                                                                                      | [27] |
|                                |                             | Ethanol+Chloroform | -      | -                                                                                                                                                     | - | 52 µl, 75 µl, 100 µl | 7 mm         | -                                                                                                                                      | [27] |
|                                | <i>Chaetomorpha sp.</i>     | Ethanol            | -      | -                                                                                                                                                     | - | 53 µl, 75 µl, 100 µl | 5 mm         | -                                                                                                                                      | [27] |
|                                |                             | Ethanol+Chloroform | -      | -                                                                                                                                                     | - | 54 µl, 75 µl, 100 µl | 4 mm         | -                                                                                                                                      | [27] |
|                                |                             | Methanol           | -      | -                                                                                                                                                     | - | 55 µl, 75 µl, 100 µl | 6 mm         | -                                                                                                                                      | [27] |
|                                | <i>Gracilaria corticata</i> | 70% methanol       | -      | Sulfurous acid, 2-ethylhexyl isohexyl ester, hexatriacontane, octacosane, mono (2-ethylhexyl) phthalate, 1-iodo-2-methylundecane and pentatriacontane | - | 100 µg/mL            | 8 ± 0.11 mm  | Antibacterial activity associated with fatty acids and sulfurous acid, 2-ethylhexyl isohexyl ester, eugenol, benzene and phthalic acid | [14] |
|                                |                             | 70% methanol       | -      | Sulfurous acid, 2-ethylhexyl isohexyl ester, hexatriacontane, octacosane, mono (2-ethylhexyl) phthalate, 1-iodo-2-methylundecane and pentatriacontane | - | 200 µg/mL            | 10 ± 0.05 mm | Antibacterial activity associated with fatty acids and sulfurous acid, 2-ethylhexyl isohexyl ester, eugenol, benzene and phthalic acid | [14] |
| <i>Pseudomonas fluorescens</i> | <i>Gracilaria corticata</i> | 70% methanol       | -      | Sulfurous acid, 2-ethylhexyl isohexyl ester, hexatriacontane,                                                                                         | - | 300 µg/mL            | 12 ± 0.07 mm | Antibacterial activity associated with fatty acids and                                                                                 | [14] |

|                                |                             |              |   |                                                                                                                                                       |   |           |              |                                                                                                                                        |      |
|--------------------------------|-----------------------------|--------------|---|-------------------------------------------------------------------------------------------------------------------------------------------------------|---|-----------|--------------|----------------------------------------------------------------------------------------------------------------------------------------|------|
|                                |                             |              |   | octacosane, mono (2-ethylhexyl) phthalate, 1-iodo-2-methylundecane and pentatriacontane                                                               |   |           |              | sulfurous acid, 2-ethylhexyl isohexyl ester, eugenol, benzene and phthalic acid                                                        |      |
|                                |                             | 70% methanol | - | Sulfurous acid, 2-ethylhexyl isohexyl ester, hexatriacontane, octacosane, mono (2-ethylhexyl) phthalate, 1-iodo-2-methylundecane and pentatriacontane | - | 400 µg/mL | 13 ± 0.03 mm | Antibacterial activity associated with fatty acids and sulfurous acid, 2-ethylhexyl isohexyl ester, eugenol, benzene and phthalic acid | [14] |
|                                |                             | 70% methanol | - | Sulfurous acid, 2-ethylhexyl isohexyl ester, hexatriacontane, octacosane, mono (2-ethylhexyl) phthalate, 1-iodo-2-methylundecane and pentatriacontane | - | 500 µg/mL | 16 ± 0.10 mm | Antibacterial activity associated with fatty acids and sulfurous acid, 2-ethylhexyl isohexyl ester, eugenol, benzene and phthalic acid | [14] |
| <i>Pseudomonas fluorescens</i> | <i>Gracilaria corticata</i> | DMSO         | - | Sulfurous acid, 2-ethylhexyl isohexyl ester, hexatriacontane, octacosane, mono (2-ethylhexyl) phthalate, 1-iodo-2-methylundecane and pentatriacontane | - | 100 µg/mL | 4 ± 0.05 mm  | Antibacterial activity associated with fatty acids and sulfurous acid, 2-ethylhexyl isohexyl ester, eugenol, benzene and phthalic acid | [14] |

|                                |                             |      |   |                                                                                                                                                       |   |           |              |                                                                                                                                        |      |
|--------------------------------|-----------------------------|------|---|-------------------------------------------------------------------------------------------------------------------------------------------------------|---|-----------|--------------|----------------------------------------------------------------------------------------------------------------------------------------|------|
|                                |                             | DMSO | - | Sulfurous acid, 2-ethylhexyl isohexyl ester, hexatriacontane, octacosane, mono (2-ethylhexyl) phthalate, 1-iodo-2-methylundecane and pentatriacontane | - | 200 µg/mL | 7 ± 0.20 mm  | Antibacterial activity associated with fatty acids and sulfurous acid, 2-ethylhexyl isohexyl ester, eugenol, benzene and phthalic acid | [14] |
|                                |                             | DMSO | - | Sulfurous acid, 2-ethylhexyl isohexyl ester, hexatriacontane, octacosane, mono (2-ethylhexyl) phthalate, 1-iodo-2-methylundecane and pentatriacontane | - | 300 µg/mL | 9 ± 0.01 mm  | Antibacterial activity associated with fatty acids and sulfurous acid, 2-ethylhexyl isohexyl ester, eugenol, benzene and phthalic acid | [14] |
|                                |                             | DMSO | - | Sulfurous acid, 2-ethylhexyl isohexyl ester, hexatriacontane, octacosane, mono (2-ethylhexyl) phthalate, 1-iodo-2-methylundecane and pentatriacontane | - | 400 µg/mL | 11 ± 0.16 mm | Antibacterial activity associated with fatty acids and sulfurous acid, 2-ethylhexyl isohexyl ester, eugenol, benzene and phthalic acid | [14] |
| <i>Pseudomonas fluorescens</i> | <i>Gracilaria corticata</i> | DMSO | - | Sulfurous acid, 2-ethylhexyl isohexyl ester, hexatriacontane, octacosane, mono (2-ethylhexyl) phthalate, 1-iodo-2-                                    | - | 500 µg/mL | 13 ± 0.01 mm | Antibacterial activity associated with fatty acids and sulfurous acid, 2-ethylhexyl isohexyl ester, eugenol,                           | [14] |

|                                |                           |              |   |                                                                                                               |   |           |             |                                                                                                                                        |      |
|--------------------------------|---------------------------|--------------|---|---------------------------------------------------------------------------------------------------------------|---|-----------|-------------|----------------------------------------------------------------------------------------------------------------------------------------|------|
|                                |                           |              |   | methylundecane and pentatriacontane                                                                           |   |           |             | benzene and phthalic acid                                                                                                              |      |
|                                | <i>Hydropuntia edulis</i> | 70% methanol | - | Eugenol, nonane, undecane, hept-2-ene, 2,4,4,6-tetramethyl, sulfurous acid, phthalic acid and 1,2-propanediol | - | 100 µg/mL | 3 ± 0.05 mm | Antibacterial activity associated with fatty acids and sulfurous acid, 2-ethylhexyl isohexyl ester, eugenol, benzene and phthalic acid | [14] |
|                                |                           | 70% methanol | - | Eugenol, nonane, undecane, hept-2-ene, 2,4,4,6-tetramethyl, sulfurous acid, phthalic acid and 1,2-propanediol | - | 200 µg/mL | 3 ± 0.01 mm | Antibacterial activity associated with fatty acids and sulfurous acid, 2-ethylhexyl isohexyl ester, eugenol, benzene and phthalic acid | [14] |
|                                |                           | 70% methanol | - | Eugenol, nonane, undecane, hept-2-ene, 2,4,4,6-tetramethyl, sulfurous acid, phthalic acid and 1,2-propanediol | - | 300 µg/mL | 4 ± 0.11 mm | Antibacterial activity associated with fatty acids and sulfurous acid, 2-ethylhexyl isohexyl ester, eugenol, benzene and phthalic acid | [14] |
| <i>Pseudomonas fluorescens</i> | <i>Hydropuntia edulis</i> | 70% methanol | - | Eugenol, nonane, undecane, hept-2-ene, 2,4,4,6-tetramethyl, sulfurous acid, phthalic acid and 1,2-propanediol | - | 400 µg/mL | 5 ± 0.20 mm | Antibacterial activity associated with fatty acids and sulfurous acid, 2-ethylhexyl isohexyl ester, eugenol,                           | [14] |

|                                |                           |              |   |                                                                                                               |   |           |             |                                                                                                                                        |      |
|--------------------------------|---------------------------|--------------|---|---------------------------------------------------------------------------------------------------------------|---|-----------|-------------|----------------------------------------------------------------------------------------------------------------------------------------|------|
|                                |                           |              |   |                                                                                                               |   |           |             | benzene and phthalic acid                                                                                                              |      |
|                                |                           | 70% methanol | - | Eugenol, nonane, undecane, hept-2-ene, 2,4,4,6-tetramethyl, sulfurous acid, phthalic acid and 1,2-propanediol | - | 500 µg/mL | 6 ± 0.06 mm | Antibacterial activity associated with fatty acids and sulfurous acid, 2-ethylhexyl isohexyl ester, eugenol, benzene and phthalic acid | [14] |
|                                |                           | DMSO         | - | Eugenol, nonane, undecane, hept-2-ene, 2,4,4,6-tetramethyl, sulfurous acid, phthalic acid and 1,2-propanediol | - | 100 µg/mL | 4 ± 0.10 mm | Antibacterial activity associated with fatty acids and sulfurous acid, 2-ethylhexyl isohexyl ester, eugenol, benzene and phthalic acid | [14] |
|                                |                           | DMSO         | - | Eugenol, nonane, undecane, hept-2-ene, 2,4,4,6-tetramethyl, sulfurous acid, phthalic acid and 1,2-propanediol | - | 200 µg/mL | 5 ± 0.02 mm | Antibacterial activity associated with fatty acids and sulfurous acid, 2-ethylhexyl isohexyl ester, eugenol, benzene and phthalic acid | [14] |
| <i>Pseudomonas fluorescens</i> | <i>Hydropuntia edulis</i> | DMSO         | - | Eugenol, nonane, undecane, hept-2-ene, 2,4,4,6-tetramethyl, sulfurous acid, phthalic acid and 1,2-propanediol | - | 300 µg/mL | 6 ± 0.05 mm | Antibacterial activity associated with fatty acids and sulfurous acid, 2-ethylhexyl isohexyl ester, eugenol,                           | [14] |

|                        |                             |                                  |   |                                                                                                               |   |                          |             |                                                                                                                                        |      |
|------------------------|-----------------------------|----------------------------------|---|---------------------------------------------------------------------------------------------------------------|---|--------------------------|-------------|----------------------------------------------------------------------------------------------------------------------------------------|------|
|                        |                             |                                  |   |                                                                                                               |   |                          |             | benzene and phthalic acid                                                                                                              |      |
|                        |                             | DMSO                             | - | Eugenol, nonane, undecane, hept-2-ene, 2,4,4,6-tetramethyl, sulfurous acid, phthalic acid and 1,2-propanediol | - | 400 µg/mL                | 8 ± 0.20 mm | Antibacterial activity associated with fatty acids and sulfurous acid, 2-ethylhexyl isohexyl ester, eugenol, benzene and phthalic acid | [14] |
|                        |                             | DMSO                             | - | Eugenol, nonane, undecane, hept-2-ene, 2,4,4,6-tetramethyl, sulfurous acid, phthalic acid and 1,2-propanediol | - | 500 µg/mL                | 9 ± 0.11 mm | Antibacterial activity associated with fatty acids and sulfurous acid, 2-ethylhexyl isohexyl ester, eugenol, benzene and phthalic acid | [14] |
|                        | <i>Stoechospermum sp</i>    | Ethanol                          | - | -                                                                                                             | - | 50 µl, 75 µl, 100 µl     | 5 mm        | -                                                                                                                                      | [31] |
|                        |                             | Ethanol:chloroform (1:1)         | - | -                                                                                                             | - | 50 µl, 75 µl, 100 µl     | 4 mm        | -                                                                                                                                      | [31] |
|                        | <i>Ulva sp.</i>             | Ethanol                          | - | -                                                                                                             | - | 56 µl, 75 µl, 100 µl     | 8 mm        | -                                                                                                                                      | [27] |
| <i>Pseudomonas sp.</i> | <i>Gracilaria corticata</i> | Ethanol                          | - | Abundance of alcohols and phenols                                                                             | - | 25 µL (holding capacity) | 9±0 mm      | -                                                                                                                                      | [32] |
| <i>Pseudomonas sp.</i> | <i>Gracilaria corticata</i> | Fraction 1 (Chloroform:methanol) | - | -                                                                                                             | - | 25 µL (holding capacity) | 4 ± 0.42 mm | -                                                                                                                                      | [32] |
|                        |                             | Fraction 2 (Chloroform:methanol) | - | -                                                                                                             | - | 25 µL (holding capacity) | 6 ± 0.17 mm | -                                                                                                                                      | [32] |
|                        |                             | Fraction 3 (Chloroform:methanol) | - | -                                                                                                             | - | 25 µL (holding capacity) | 5 ± 1.63 mm | -                                                                                                                                      | [32] |



|                              |                                |                                      |                  |                                   |                                        |                          |                                  |                                          |      |
|------------------------------|--------------------------------|--------------------------------------|------------------|-----------------------------------|----------------------------------------|--------------------------|----------------------------------|------------------------------------------|------|
|                              | <i>Ulva lactuca</i>            | Ethanol (crude)                      | -                | Abundance of alcohols and phenols | -                                      | 25 µL (holding capacity) | 6 ± 2.44 mm                      | -                                        | [32] |
|                              |                                | Fraction 1 (Chloroform:metanol)      | -                | -                                 | -                                      | 25 µL (holding capacity) | 5 ± 0.81 mm                      | -                                        | [32] |
|                              |                                | Fraction 2 (Chloroform:metanol)      | -                | -                                 | -                                      | 25 µL (holding capacity) | 5 ± 0.81 mm                      | -                                        | [32] |
|                              |                                | Fraction 3 (Chloroform:metanol)      | -                | -                                 | -                                      | 25 µL (holding capacity) | 6 ± 1.63 mm                      | -                                        | [32] |
| <i>Staphylococcus aureus</i> | <i>Acanthophora spicifera</i>  | Ethanol                              | -                | Flavonoids and tannins            | -                                      | -                        | 6.3 ± 0.5 mm                     | -                                        | [33] |
|                              | <i>Aglaothamnion sepositum</i> | -                                    | Spring           | -                                 | -                                      | Disc thallus             | 3 mm                             | -                                        | [2]  |
|                              |                                | -                                    | Summer           | -                                 | -                                      | Disc thallus             | 2,5 mm                           | -                                        | [2]  |
|                              |                                | -                                    | Autumn           | -                                 | -                                      | Disc thallus             | 2,5 mm                           | -                                        | [2]  |
|                              |                                | -                                    | Winter           | -                                 | -                                      | Disc thallus             | 2 mm                             | -                                        | [2]  |
|                              | <i>Alaria esculenta</i>        | -                                    | Summer           | -                                 | -                                      | Disc thallus             | 4 mm                             | -                                        | [2]  |
|                              |                                | -                                    | Autumn           | -                                 | -                                      | Disc thallus             | 6 mm                             | -                                        | [2]  |
|                              |                                | -                                    | Summer (Sterile) | -                                 | -                                      | Disc thallus             | 4 mm                             | -                                        | [2]  |
|                              | <i>Antithamnion cruciatum</i>  | -                                    | Spring           | -                                 | -                                      | Disc thallus             | 4 mm                             | -                                        | [2]  |
|                              |                                | -                                    | Summer           | -                                 | -                                      | Disc thallus             | 2,5 mm                           | -                                        | [2]  |
|                              |                                | -                                    | Autumn           | -                                 | -                                      | Disc thallus             | 1 mm                             | -                                        | [2]  |
|                              |                                | -                                    | Winter           | -                                 | -                                      | Disc thallus             | 1 mm                             | -                                        | [2]  |
|                              | <i>Asparagopsis armata</i>     | -                                    | Summer           | -                                 | -                                      | Disc thallus             | 12 mm (width of inhibition zone) | -                                        | [2]  |
|                              | <i>Avrainvillea nigricans</i>  | Ethyl acetate partition of Methanols | -                | -                                 | -                                      | 100 µL                   | 0.38                             | Data of inhibition not specified (units) | [4]  |
| <i>Staphylococcus aureus</i> | <i>Bangia fuscopurpurea</i>    | Chloroform                           | -                | -                                 | Fatty acids (free or as acylglycerols) | -                        | -                                | -                                        | [34] |
|                              | <i>Bifurcaria bifurcata</i>    | -                                    | Spring           | -                                 | -                                      | Disc thallus             | 3,5 mm                           | -                                        | [2]  |
|                              |                                | -                                    | Summer           | -                                 | -                                      | Disc thallus             | 4 mm                             | -                                        | [2]  |
|                              |                                | -                                    | Autumn           | -                                 | -                                      | Disc thallus             | 4 mm                             | -                                        | [2]  |

|                              |                                   |   |                      |                                            |   |              |         |                                    |      |
|------------------------------|-----------------------------------|---|----------------------|--------------------------------------------|---|--------------|---------|------------------------------------|------|
|                              | <i>Bonnemaisonia asparagoides</i> | - | -                    | E,Z-1-bromo-1,2-dichloro-1-octene-3-one    | - | -            | -       | It presents antibacterial activity | [35] |
|                              |                                   | - | -                    | E,Z-1-bromo-1,2,2-trichloro-1-octene-3-one | - | -            | -       | It presents antibacterial activity | [35] |
|                              |                                   | - | -                    | 2,4-dibromo-1,1-dichloro-1-octene-3-one    | - | -            | -       | It presents antibacterial activity | [35] |
| <i>Staphylococcus aureus</i> | <i>Bonnemaisonia asparagoides</i> | - | -                    | E-1,2-dibromo-1,4-dichloro-1-octene-3-one  | - | -            | -       | It presents antibacterial activity | [35] |
|                              |                                   | - | -                    | E-1-chloro-1,2,4-tribromo-1-octene-3-one   | - | -            | -       | It presents antibacterial activity | [35] |
|                              |                                   | - | Summer               | -                                          | - | Disc thallus | 16 mm   | -                                  | [2]  |
|                              | <i>Bonnemaisonia hamifera</i>     | - | Summer               | -                                          | - | Disc thallus | 17 mm   | -                                  | [2]  |
|                              |                                   | - | Summer (Sterile)     | -                                          | - | Disc thallus | 17 mm   | -                                  | [2]  |
|                              |                                   | - | Spring (Tetrasporic) | -                                          | - | Disc thallus | 29 mm   | -                                  | [2]  |
|                              | <i>Bostrychia scorpioides</i>     | - | Spring               | -                                          | - | Disc thallus | 3 mm    | -                                  | [2]  |
|                              |                                   | - | Summer               | -                                          | - | Disc thallus | 1 mm    | -                                  | [2]  |
|                              |                                   | - | Autumn               | -                                          | - | Disc thallus | 1 mm    | -                                  | [2]  |
|                              |                                   | - | Winter               | -                                          | - | Disc thallus | 2 mm    | -                                  | [2]  |
|                              | <i>Bryopsis plumosa</i>           | - | Spring               | -                                          | - | Disc thallus | 4 mm    | -                                  | [2]  |
|                              |                                   | - | Summer               | -                                          | - | Disc thallus | 1,5 mm  | -                                  | [2]  |
|                              | <i>Callithamnion tetragonum</i>   | - | Spring               | -                                          | - | Disc thallus | 5,5 mm  | -                                  | [2]  |
|                              |                                   | - | Summer               | -                                          | - | Disc thallus | 5 mm    | -                                  | [2]  |
|                              |                                   | - | Autumn               | -                                          | - | Disc thallus | 5 mm    | -                                  | [2]  |
|                              |                                   | - | Winter               | -                                          | - | Disc thallus | 4 mm    | -                                  | [2]  |
|                              | <i>Callithamnion tetricum</i>     | - | Spring               | -                                          | - | Disc thallus | 5 mm    | -                                  | [2]  |
|                              |                                   | - | Summer               | -                                          | - | Disc thallus | 7 mm    | -                                  | [2]  |
|                              |                                   | - | Autumn               | -                                          | - | Disc thallus | 6 mm    | -                                  | [2]  |
|                              |                                   | - | Winter               | -                                          | - | Disc thallus | 4 mm    | -                                  | [2]  |
|                              | <i>Callocolax neglectus</i>       | - | Summer               | -                                          | - | Disc thallus | 2 mm    | -                                  | [2]  |
|                              |                                   | - | Autumn               | -                                          | - | Disc thallus | 1 mm    | -                                  | [2]  |
|                              |                                   | - | Spring               | -                                          | - | Disc thallus | 15,5 mm | -                                  | [2]  |

|                              |                                 |                 |                      |                                   |   |                               |               |   |      |
|------------------------------|---------------------------------|-----------------|----------------------|-----------------------------------|---|-------------------------------|---------------|---|------|
|                              | <i>Carradoriella elongata</i>   | -               | Summer               | -                                 | - | Disc thallus                  | 16 mm         | - | [2]  |
|                              |                                 | -               | Autumn               | -                                 | - | Disc thallus                  | 16 mm         | - | [2]  |
|                              |                                 | -               | Winter               | -                                 | - | Disc thallus                  | 12 mm         | - | [2]  |
|                              |                                 | -               | Spring (Sterile)     | -                                 | - | Disc thallus                  | 16 mm         | - | [2]  |
|                              |                                 | -               | Spring (Tetrasporic) | -                                 | - | Disc thallus                  | 15 mm         | - | [2]  |
|                              | <i>Caulerpa peltata</i>         | Ethanol         | -                    | Abundance of alcohols and phenols | - | -                             | 6.6 ± 1.5 mm  | - | [33] |
| <i>Staphylococcus aureus</i> | <i>Caulerpa scalpelliformis</i> | Ethanol         | -                    | Abundance of alcohols and phenols | - | -                             | 6.0 ± 1.0 mm  | - | [33] |
|                              | <i>Chaetomorpha antennina</i>   | Petroleum ether | -                    | -                                 | - | 50 µg/mL (dissolved in DMSO)  | 7.3 ± 0.8 mm  | - | [7]  |
|                              |                                 | Petroleum ether | -                    | -                                 | - | 100 µg/mL (dissolved in DMSO) | 7.83 ± 1.8 mm | - | [7]  |
|                              |                                 | Petroleum ether | -                    | -                                 | - | 200 µg/mL (dissolved in DMSO) | 11 ± 0.6 mm   | - | [7]  |
|                              |                                 | Petroleum ether | -                    | -                                 | - | 300 µg/mL (dissolved in DMSO) | 12.8 ± 0.7 mm | - | [7]  |
|                              |                                 | Petroleum ether | -                    | -                                 | - | 400 µg/mL (dissolved in DMSO) | 14.8 ± 0.7 mm | - | [7]  |
|                              |                                 | Petroleum ether | -                    | -                                 | - | 500 µg/mL (dissolved in DMSO) | 18 ± 2.4 mm   | - | [7]  |
|                              | <i>Chondria dasyphylla</i>      | -               | Spring               | -                                 | - | Disc thallus                  | 4 mm          | - | [2]  |
|                              |                                 | -               | Summer               | -                                 | - | Disc thallus                  | 1,5 mm        | - | [2]  |
|                              |                                 | -               | Autumn               | -                                 | - | Disc thallus                  | 2,5 mm        | - | [2]  |
|                              |                                 | -               | Winter               | -                                 | - | Disc thallus                  | 2,5 mm        | - | [2]  |
|                              | <i>Chondrus crispus</i>         | -               | Spring               | -                                 | - | Disc thallus                  | 14 mm         | - | [2]  |
|                              |                                 | -               | Summer               | -                                 | - | Disc thallus                  | 15,5 mm       | - | [2]  |
|                              |                                 | -               | Autumn               | -                                 | - | Disc thallus                  | 15 mm         | - | [2]  |
|                              |                                 | -               | Winter               | -                                 | - | Disc thallus                  | 22 mm         | - | [2]  |

|                              |                                   |               |                       |   |   |              |              |                                          |      |
|------------------------------|-----------------------------------|---------------|-----------------------|---|---|--------------|--------------|------------------------------------------|------|
|                              |                                   | -             | Spring (Sterile)      | - | - | Disc thallus | 14 mm        | -                                        | [2]  |
|                              |                                   | -             | Spring (Tetrasporic)  | - | - | Disc thallus | 15 mm        | -                                        | [2]  |
|                              | <i>Chordaria flagelliformis</i>   | -             | Summer                | - | - | Disc thallus | 4 mm         | -                                        | [2]  |
|                              |                                   | -             | Autumn                | - | - | Disc thallus | 3,5 mm       | -                                        | [2]  |
|                              | <i>Codium decorticatum</i>        | Ethyl acetate | -                     | - | - | 100 µL       | 0.50         | Data of inhibition not specified (units) | [4]  |
|                              | <i>Codium fragile</i>             | -             | Spring                | - | - | Disc thallus | 7 mm         | -                                        | [2]  |
|                              |                                   | -             | Summer                | - | - | Disc thallus | 6 mm         | -                                        | [2]  |
|                              | <i>Codium fragile</i>             | -             | Autumn                | - | - | Disc thallus | 4 mm         | -                                        | [2]  |
|                              |                                   | -             | Winter                | - | - | Disc thallus | 4 mm         | -                                        | [2]  |
|                              | <i>Codium intertextum</i>         | Methanol      | Autumn                | - | - | 5 µL         | 10 mm        | -                                        | [9]  |
| <i>Staphylococcus aureus</i> |                                   | Methanol      | Winter                | - | - | 5 µL         | 10 mm        | -                                        | [9]  |
|                              | <i>Codium tomentosum</i>          | -             | Spring                | - | - | Disc thallus | 6 mm         | -                                        | [2]  |
|                              |                                   | -             | Summer                | - | - | Disc thallus | 5,5 mm       | -                                        | [2]  |
|                              |                                   | -             | Autumn                | - | - | Disc thallus | 4,5 mm       | -                                        | [2]  |
|                              |                                   | -             | Winter                | - | - | Disc thallus | 4 mm         | -                                        | [2]  |
|                              | <i>Crassiphycus changii</i>       | Diethyl ether | Cholesteryl myristate | - | - | 0.2 mg/disc  | 12.6 ±0.6 mm | -                                        | [11] |
|                              | <i>Delesseria sanguinea</i>       | -             | Spring                | - | - | Disc thallus | 3,5 mm       | -                                        | [2]  |
|                              |                                   | -             | Summer                | - | - | Disc thallus | 1 mm         | -                                        | [2]  |
|                              |                                   | -             | Autumn                | - | - | Disc thallus | 1 mm         | -                                        | [2]  |
|                              | <i>Desmarestia aculeata</i>       | -             | Spring                | - | - | Disc thallus | 12 mm        | -                                        | [2]  |
|                              |                                   | -             | Summer                | - | - | Disc thallus | 10 mm        | -                                        | [2]  |
|                              |                                   | -             | Autumn                | - | - | Disc thallus | 9 mm         | -                                        | [2]  |
|                              |                                   | -             | Winter                | - | - | Disc thallus | 4 mm         | -                                        | [2]  |
|                              | <i>Desmarestia ligulata</i>       | -             | Summer                | - | - | Disc thallus | 27 mm        | -                                        | [2]  |
|                              |                                   | -             | Autumn                | - | - | Disc thallus | 26 mm        | -                                        | [2]  |
|                              | <i>Dictyopteris polypodioides</i> | -             | Spring                | - | - | Disc thallus | 6,5 mm       | -                                        | [2]  |
|                              |                                   | -             | Summer                | - | - | Disc thallus | 7 mm         | -                                        | [2]  |
|                              |                                   | -             | Autumn                | - | - | Disc thallus | 7 mm         | -                                        | [2]  |
|                              |                                   | -             | Winter                | - | - | Disc thallus | 3 mm         | -                                        | [2]  |

|                              |                                                |               |                  |   |                                      |                             |         |                                                                                                                                                             |      |
|------------------------------|------------------------------------------------|---------------|------------------|---|--------------------------------------|-----------------------------|---------|-------------------------------------------------------------------------------------------------------------------------------------------------------------|------|
|                              |                                                | Methanol      | -                | - | Phlorotannins present in brown algae | -                           | 28 mm   | -                                                                                                                                                           | [28] |
|                              | <i>Dictyota cervicornis</i>                    | Ethanol       | -                | - | -                                    | 6 mg/disc                   | 9 mm    | -                                                                                                                                                           | [12] |
|                              | <i>Dictyota dichotoma</i>                      | -             | Spring           | - | -                                    | Disc thallus                | 2 mm    | -                                                                                                                                                           | [2]  |
|                              |                                                | -             | Summer           | - | -                                    | Disc thallus                | 8 mm    | -                                                                                                                                                           | [2]  |
|                              |                                                | -             | Autumn           | - | -                                    | Disc thallus                | 3 mm    | -                                                                                                                                                           | [2]  |
|                              |                                                | -             | Summer (Sterile) | - | -                                    | Disc thallus                | 8 mm    | -                                                                                                                                                           | [36] |
|                              |                                                | -             | Summer (Male)    | - | -                                    | Disc thallus                | 8,5 mm  | -                                                                                                                                                           | [36] |
|                              |                                                | -             | Summer (Female)  | - | -                                    | Disc thallus                | 9 mm    | -                                                                                                                                                           | [36] |
|                              |                                                | Methanol      | -                | - | -                                    | 25 µL                       | 0-5 mm  | -                                                                                                                                                           | [37] |
|                              | <i>Dictyota dichotoma</i>                      | Diethyl ether | -                | - | -                                    | 25 µL                       | 0-5 mm  | -                                                                                                                                                           | [37] |
|                              |                                                | Chloroform    | -                | - | -                                    | 25 µL                       | 5-10 mm | -                                                                                                                                                           | [37] |
| <i>Staphylococcus aureus</i> | <i>Dictyota dichotoma</i> var <i>intricata</i> | Ethanol       | -                | - | -                                    | 2 mg/disc                   | 9 mm    | -                                                                                                                                                           | [12] |
|                              |                                                | Ethanol       | -                | - | -                                    | 4 mg/disc                   | 10 mm   | -                                                                                                                                                           | [12] |
|                              |                                                | Ethanol       | -                | - | -                                    | 6 mg/disc                   | 13 mm   | -                                                                                                                                                           | [12] |
|                              | <i>Dilsea carnosa</i>                          | -             | Spring           | - | -                                    | Disc thallus                | 12,5 mm | -                                                                                                                                                           | [2]  |
|                              |                                                | -             | Summer           | - | -                                    | Disc thallus                | 12 mm   | -                                                                                                                                                           | [2]  |
|                              |                                                | -             | Autumn           | - | -                                    | Disc thallus                | 10 mm   | -                                                                                                                                                           | [2]  |
|                              |                                                | -             | Winter           | - | -                                    | Disc thallus                | 8,5 mm  | -                                                                                                                                                           | [2]  |
|                              | <i>Ellisolandia elongata</i>                   | Methanol      | -                | - | -                                    | 25 µL                       | 5-10 mm | -                                                                                                                                                           | [37] |
|                              |                                                | Diethyl ether | -                | - | -                                    | 25 µL                       | 0-5 mm  | -                                                                                                                                                           | [37] |
|                              |                                                | Chloroform    | -                | - | -                                    | 25 µL                       | 5-10 mm | -                                                                                                                                                           | [37] |
|                              | <i>Enteromorpha antenna</i> *                  | Methanol      | -                | - | -                                    | 250 µg/mL (extract in DMSO) | 10 mm   | Antibacterial activity in algae reported in bromophenols, carbonyls, halogenated aliphatic compounds, terpenes, isoprenylated and brominated hydroquinones, | [13] |

|  |  |          |   |   |   |                                    |       |                                                                                                                                                                                                                             |      |
|--|--|----------|---|---|---|------------------------------------|-------|-----------------------------------------------------------------------------------------------------------------------------------------------------------------------------------------------------------------------------|------|
|  |  |          |   |   |   |                                    |       | as well as<br>phlorotannins                                                                                                                                                                                                 |      |
|  |  | Methanol | - | - | - | 500 µg/mL<br>(extract in<br>DMSO)  | 13 mm | Antibacterial<br>activity in algae<br>reported in<br>bromophenols,<br>carbonyls,<br>halogenated<br>aliphatic<br>compounds,<br>terpenes,<br>isoprenylated<br>and brominated<br>hydroquinones,<br>as well as<br>phlorotannins | [13] |
|  |  | Methanol | - | - | - | 750 µg/mL<br>(extract in<br>DMSO)  | 15 mm | Antibacterial<br>activity in algae<br>reported in<br>bromophenols,<br>carbonyls,<br>halogenated<br>aliphatic<br>compounds,<br>terpenes,<br>isoprenylated<br>and brominated<br>hydroquinones,<br>as well as<br>phlorotannins | [13] |
|  |  | Methanol | - | - | - | 1000 µg/mL<br>(extract in<br>DMSO) | 17 mm | Antibacterial<br>activity in algae<br>reported in<br>bromophenols,<br>carbonyls,<br>halogenated<br>aliphatic<br>compounds,<br>terpenes,<br>isoprenylated<br>and brominated                                                  | [13] |

|  |                                 |                                         |        |                                         |   |                                   |             |                                                                                                                                                                                     |      |
|--|---------------------------------|-----------------------------------------|--------|-----------------------------------------|---|-----------------------------------|-------------|-------------------------------------------------------------------------------------------------------------------------------------------------------------------------------------|------|
|  |                                 |                                         |        |                                         |   |                                   |             | hydroquinones,<br>as well as<br>phlorotannins                                                                                                                                       |      |
|  | <i>Ericaria selaginoides</i>    | -                                       | Spring | -                                       | - | Disc thallus                      | 5 mm        | -                                                                                                                                                                                   | [2]  |
|  |                                 | -                                       | Summer | -                                       | - | Disc thallus                      | 5 mm        | -                                                                                                                                                                                   | [2]  |
|  |                                 | -                                       | Autumn | -                                       | - | Disc thallus                      | 4 mm        | -                                                                                                                                                                                   | [2]  |
|  |                                 | -                                       | Winter | -                                       | - | Disc thallus                      | 2,5 mm      | -                                                                                                                                                                                   | [2]  |
|  | <i>Eudesme virescens</i>        | -                                       | Summer | -                                       | - | Disc thallus                      | 3 mm        | -                                                                                                                                                                                   | [2]  |
|  |                                 | -                                       | Autumn | -                                       | - | Disc thallus                      | 3,5 mm      | -                                                                                                                                                                                   | [2]  |
|  | <i>Gloiosiphonia capillaris</i> | -                                       | Summer | -                                       | - | Disc thallus                      | 36 mm       | -                                                                                                                                                                                   | [2]  |
|  | <i>Gongolaria baccata</i>       | -                                       | Spring | -                                       | - | Disc thallus                      | 4 mm        | -                                                                                                                                                                                   | [2]  |
|  |                                 | -                                       | Summer | -                                       | - | Disc thallus                      | 4,5 mm      | -                                                                                                                                                                                   | [2]  |
|  |                                 | -                                       | Autumn | -                                       | - | Disc thallus                      | 4,5 mm      | -                                                                                                                                                                                   | [2]  |
|  |                                 | -                                       | Winter | -                                       | - | Disc thallus                      | 2 mm        | -                                                                                                                                                                                   | [2]  |
|  | <i>Gracilaria corticata</i>     | Ethanol                                 |        | Abundance of<br>alcohols and<br>phenols | - | 25 µL (holding<br>capacity)       | 6 ± 3.48 mm | -                                                                                                                                                                                   | [32] |
|  |                                 | Fraction 1<br>(Chloroform:met<br>hanol) | -      | -                                       | - | 25 µL (holding<br>capacity)       | 4 ± 0.50 mm | -                                                                                                                                                                                   | [32] |
|  |                                 | Fraction 2<br>(Chloroform:met<br>hanol) | -      | -                                       | - | 25 µL (holding<br>capacity)       | 4 ± 0.35 mm | -                                                                                                                                                                                   | [32] |
|  |                                 | Fraction 3<br>(Chloroform:met<br>hanol) | -      | -                                       | - | 25 µL (holding<br>capacity)       | 5 ± 0.82 mm | -                                                                                                                                                                                   | [32] |
|  | <i>Gracilaria corticata</i>     | Methanol                                | -      | -                                       | - | 500 µg/mL<br>(extract in<br>DMSO) | 10 mm       | Antibacterial<br>activity reported<br>in<br>bromophenols,<br>carbonyls,<br>halogenated<br>aliphatic<br>compounds,<br>terpenes,<br>isoprenylated<br>and brominated<br>hydroquinones, | [13] |

|                              |                             |              |   |                                                                                                                                                       |   |                              |             |                                                                                                                                                                             |      |
|------------------------------|-----------------------------|--------------|---|-------------------------------------------------------------------------------------------------------------------------------------------------------|---|------------------------------|-------------|-----------------------------------------------------------------------------------------------------------------------------------------------------------------------------|------|
| <i>Staphylococcus aureus</i> |                             |              |   |                                                                                                                                                       |   |                              |             | as well as phlorotannins                                                                                                                                                    |      |
|                              |                             | Methanol     | - | -                                                                                                                                                     | - | 750 µg/mL (extract in DMSO)  | 12 mm       | Antibacterial activity reported in bromophenols, carbonyls, halogenated aliphatic compounds, terpenes, isoprenylated and brominated hydroquinones, as well as phlorotannins | [13] |
|                              |                             | Methanol     | - | -                                                                                                                                                     | - | 1000 µg/mL (extract in DMSO) | 14 mm       | Antibacterial activity reported in bromophenols, carbonyls, halogenated aliphatic compounds, terpenes, isoprenylated and brominated hydroquinones, as well as phlorotannins | [13] |
|                              | <i>Gracilaria corticata</i> | 70% methanol | - | Sulfurous acid, 2-ethylhexyl isohexyl ester, hexatriacontane, octacosane, mono (2-ethylhexyl) phthalate, 1-iodo-2-methylundecane and pentatriacontane | - | 100 µg/mL                    | 4 ± 0.10 mm | Antibacterial activity associated with fatty acids and sulfurous acid, 2-ethylhexyl isohexyl ester, eugenol, benzene and phthalic acid                                      | [14] |



|                              |                             |              |   |                                                                                                                                                       |   |           |              |                                                                                                                                        |      |
|------------------------------|-----------------------------|--------------|---|-------------------------------------------------------------------------------------------------------------------------------------------------------|---|-----------|--------------|----------------------------------------------------------------------------------------------------------------------------------------|------|
| <i>Staphylococcus aureus</i> |                             | 70% methanol | - | Sulfurous acid, 2-ethylhexyl isohexyl ester, hexatriacontane, octacosane, mono (2-ethylhexyl) phthalate, 1-iodo-2-methylundecane and pentatriacontane | - | 200 µg/mL | 8 ± 0.04 mm  | Antibacterial activity associated with fatty acids and sulfurous acid, 2-ethylhexyl isohexyl ester, eugenol, benzene and phthalic acid | [14] |
|                              |                             | 70% methanol | - | Sulfurous acid, 2-ethylhexyl isohexyl ester, hexatriacontane, octacosane, mono (2-ethylhexyl) phthalate, 1-iodo-2-methylundecane and pentatriacontane | - | 300 µg/mL | 12 ± 0.00 mm | Antibacterial activity associated with fatty acids and sulfurous acid, 2-ethylhexyl isohexyl ester, eugenol, benzene and phthalic acid | [14] |
|                              |                             | 70% methanol | - | Sulfurous acid, 2-ethylhexyl isohexyl ester, hexatriacontane, octacosane, mono (2-ethylhexyl) phthalate, 1-iodo-2-methylundecane and pentatriacontane | - | 400 µg/mL | 14 ± 0.20 mm | Antibacterial activity associated with fatty acids and sulfurous acid, 2-ethylhexyl isohexyl ester, eugenol, benzene and phthalic acid | [14] |
| <i>Staphylococcus aureus</i> | <i>Gracilaria corticata</i> | 70% methanol | - | Sulfurous acid, 2-ethylhexyl isohexyl ester, hexatriacontane, octacosane, mono (2-ethylhexyl) phthalate, 1-iodo-2-                                    | - | 500 µg/mL | 15 ± 0.16 mm | Antibacterial activity associated with fatty acids and sulfurous acid, 2-ethylhexyl isohexyl ester, eugenol,                           | [14] |

|                              |                             |      |   |                                                                                                                                                       |   |           |              |                                                                                                                                        |      |
|------------------------------|-----------------------------|------|---|-------------------------------------------------------------------------------------------------------------------------------------------------------|---|-----------|--------------|----------------------------------------------------------------------------------------------------------------------------------------|------|
|                              |                             |      |   | methylundecane and pentatriacontane                                                                                                                   |   |           |              | benzene and phthalic acid                                                                                                              |      |
|                              |                             | DMSO | - | Sulfurous acid, 2-ethylhexyl isohexyl ester, hexatriacontane, octacosane, mono (2-ethylhexyl) phthalate, 1-iodo-2-methylundecane and pentatriacontane | - | 100 µg/mL | 6 ± 0.05 mm  | Antibacterial activity associated with fatty acids and sulfurous acid, 2-ethylhexyl isohexyl ester, eugenol, benzene and phthalic acid | [14] |
|                              |                             | DMSO | - | Sulfurous acid, 2-ethylhexyl isohexyl ester, hexatriacontane, octacosane, mono (2-ethylhexyl) phthalate, 1-iodo-2-methylundecane and pentatriacontane | - | 200 µg/mL | 8 ± 0.02 mm  | Antibacterial activity associated with fatty acids and sulfurous acid, 2-ethylhexyl isohexyl ester, eugenol, benzene and phthalic acid | [14] |
|                              |                             | DMSO | - | Sulfurous acid, 2-ethylhexyl isohexyl ester, hexatriacontane, octacosane, mono (2-ethylhexyl) phthalate, 1-iodo-2-methylundecane and pentatriacontane | - | 300 µg/mL | 10 ± 0.08 mm | Antibacterial activity associated with fatty acids and sulfurous acid, 2-ethylhexyl isohexyl ester, eugenol, benzene and phthalic acid | [14] |
| <i>Staphylococcus aureus</i> | <i>Gracilaria corticata</i> | DMSO | - | Sulfurous acid, 2-ethylhexyl isohexyl ester, hexatriacontane, octacosane, mono                                                                        | - | 400 µg/mL | 12 ± 0.01 mm | Antibacterial activity associated with fatty acids and sulfurous acid,                                                                 | [14] |

|                              |                             |                           |   |                                                                                                                                                       |                                                                                   |           |              |                                                                                                                                        |      |
|------------------------------|-----------------------------|---------------------------|---|-------------------------------------------------------------------------------------------------------------------------------------------------------|-----------------------------------------------------------------------------------|-----------|--------------|----------------------------------------------------------------------------------------------------------------------------------------|------|
| <i>Staphylococcus aureus</i> |                             |                           |   | (2-ethylhexyl) phthalate, 1-iodo-2-methylundecane and pentatriacontane                                                                                |                                                                                   |           |              | 2-ethylhexyl isohexyl ester, eugenol, benzene and phthalic acid                                                                        |      |
|                              |                             | DMSO                      | - | Sulfurous acid, 2-ethylhexyl isohexyl ester, hexatriacontane, octacosane, mono (2-ethylhexyl) phthalate, 1-iodo-2-methylundecane and pentatriacontane | -                                                                                 | 500 µg/mL | 14 ± 0.04 mm | Antibacterial activity associated with fatty acids and sulfurous acid, 2-ethylhexyl isohexyl ester, eugenol, benzene and phthalic acid | [14] |
|                              |                             | Chloroform (Soxhlet/hot)  | - | Alkaloids, steroids, sugars                                                                                                                           | Saponins, alkaloids, phenols, steroids and triterpenoids and free hydroxyl groups | 125 µg/ml | 9 mm         | Tannins at low concentration and saponins have antimicrobial activity                                                                  | [29] |
|                              | <i>Gracilaria corticata</i> | Isopropanol (Soxhlet/hot) | - | Phenols, steroids, glycosides                                                                                                                         | Saponins, alkaloids, phenols, steroids and triterpenoids and free hydroxyl groups | 125 µg/ml | 9 mm         | Tannins at low concentration have antimicrobial activity.                                                                              | [29] |
|                              |                             | Chloroform (Cold)         | - | Alkaloids, saponins, steroids, sugars                                                                                                                 | Saponins, alkaloids, phenols, steroids and triterpenoids and free hydroxyl groups | 125 µg/ml | 8 mm         | Tannins at low concentration and saponins have antimicrobial activity                                                                  | [29] |
|                              |                             | Isopropanol (Cold)        | - | Phenols, glycosides, sugars                                                                                                                           | Saponins, alkaloids, phenols, steroids and triterpenoids and free hydroxyl groups | 125 µg/ml | 6 mm         | Tannins at low concentration have antimicrobial activity.                                                                              | [29] |

|                              |                                  |                        |                      |                                                                             |                                                                                   |                  |              |                                                                                     |      |
|------------------------------|----------------------------------|------------------------|----------------------|-----------------------------------------------------------------------------|-----------------------------------------------------------------------------------|------------------|--------------|-------------------------------------------------------------------------------------|------|
|                              |                                  | Petroleum ether (Cold) | -                    | Alkaloids, saponins, steroids, tannins, sugars                              | Saponins, alkaloids, phenols, steroids and triterpenoids and free hydroxyl groups | 125 µg/ml        | 7 mm         | Tannins at low concentration and saponins have antimicrobial activity               | [29] |
| <i>Staphylococcus aureus</i> | <i>Gracilaria corticata</i>      | Ethanol                | -                    | Flavonoids and tannins                                                      | -                                                                                 | -                | 7.3 ± 1.1 mm | -                                                                                   | [33] |
|                              | <i>Gracilariopsis longissima</i> | -                      | Autumn               | -                                                                           | -                                                                                 | Disc thallus     | 1 mm         | -                                                                                   | [2]  |
|                              |                                  | -                      | Winter               | -                                                                           | -                                                                                 | Disc thallus     | 4 mm         | -                                                                                   | [2]  |
|                              |                                  | -                      | Winter (Sterile)     | -                                                                           | -                                                                                 | Disc thallus     | 4 mm         | -                                                                                   | [2]  |
|                              |                                  | -                      | Winter (Cystocarpic) | -                                                                           | -                                                                                 | Disc thallus     | 6 mm         | -                                                                                   | [2]  |
|                              | <i>Halidrys siliquosa</i>        | -                      | Spring               | -                                                                           | -                                                                                 | Disc thallus     | 6,5 mm       | -                                                                                   | [2]  |
|                              |                                  | -                      | Summer               | -                                                                           | -                                                                                 | Disc thallus     | 5 mm         | -                                                                                   | [2]  |
|                              |                                  | -                      | Autumn               | -                                                                           | -                                                                                 | Disc thallus     | 4 mm         | -                                                                                   | [2]  |
|                              |                                  | -                      | Winter               | -                                                                           | -                                                                                 | Disc thallus     | 2,5 mm       | -                                                                                   | [2]  |
|                              |                                  | -                      | Winter (Sterile)     | -                                                                           | -                                                                                 | Disc thallus     | 3 mm         | -                                                                                   | [36] |
|                              |                                  | -                      | Winter (Fertile)     | -                                                                           | -                                                                                 | Disc thallus     | 2,5 mm       | -                                                                                   | [36] |
|                              | <i>Haligra</i> sps.*             | Methanol               | -                    | High phenolic content                                                       | -                                                                                 | 200 µg (1 mg/ml) | 16 ± 0.9 mm  | -                                                                                   | [38] |
|                              | <i>Halimeda tuna</i>             | Ethanol                | -                    | -                                                                           | -                                                                                 | 4 mg/disc        | 7 mm         | Produced weak zone and later bacteria grown.                                        | [12] |
|                              |                                  | Ethanol                | -                    | -                                                                           | -                                                                                 | 6 mg/disc        | 9 mm         | -                                                                                   | [12] |
|                              | <i>Halopithys incurva</i>        | -                      | Spring               | -                                                                           | -                                                                                 | Disc thallus     | 4 mm         | -                                                                                   | [2]  |
|                              |                                  | -                      | Summer               | -                                                                           | -                                                                                 | Disc thallus     | 2,5 mm       | -                                                                                   | [2]  |
|                              |                                  | -                      | Autumn               | -                                                                           | -                                                                                 | Disc thallus     | 2 mm         | -                                                                                   | [2]  |
|                              |                                  | -                      | Winter               | -                                                                           | -                                                                                 | Disc thallus     | 2 mm         | -                                                                                   | [2]  |
|                              | <i>Halopterois scoparia</i>      | Methanol               | Autumn               | -                                                                           | -                                                                                 | 5 µL             | 10 mm        | -                                                                                   | [9]  |
|                              |                                  | Methanol               | Winter               | -                                                                           | -                                                                                 | 5 µL             | 15 mm        | -                                                                                   | [9]  |
|                              | <i>Hydropuntia edulis</i>        | 70% methanol           | -                    | Eugenol, nonane, undecane, hept-2-ene, 2,4,4,6-tetramethyl, sulfurous acid, | -                                                                                 | 100 µg/mL        | 3 ± 0.05 mm  | Antibacterial activity associated with fatty acids and sulfurous acid, 2-ethylhexyl | [14] |

|                              |                           |              |   |                                                                                                               |   |           |             |                                                                                                                                        |      |
|------------------------------|---------------------------|--------------|---|---------------------------------------------------------------------------------------------------------------|---|-----------|-------------|----------------------------------------------------------------------------------------------------------------------------------------|------|
|                              |                           |              |   | phthalic acid and 1,2-propanediol                                                                             |   |           |             | isohexyl ester, eugenol, benzene and phthalic acid                                                                                     |      |
|                              |                           | 70% methanol | - | Eugenol, nonane, undecane, hept-2-ene, 2,4,4,6-tetramethyl, sulfurous acid, phthalic acid and 1,2-propanediol | - | 200 µg/mL | 3 ± 0.11 mm | Antibacterial activity associated with fatty acids and sulfurous acid, 2-ethylhexyl isohexyl ester, eugenol, benzene and phthalic acid | [14] |
|                              | <i>Hydropuntia edulis</i> | 70% methanol | - | Eugenol, nonane, undecane, hept-2-ene, 2,4,4,6-tetramethyl, sulfurous acid, phthalic acid and 1,2-propanediol | - | 300 µg/mL | 4 ± 0.03 mm | Antibacterial activity associated with fatty acids and sulfurous acid, 2-ethylhexyl isohexyl ester, eugenol, benzene and phthalic acid | [14] |
| <i>Staphylococcus aureus</i> | <i>Hydropuntia edulis</i> | 70% methanol | - | Eugenol, nonane, undecane, hept-2-ene, 2,4,4,6-tetramethyl, sulfurous acid, phthalic acid and 1,2-propanediol | - | 400 µg/mL | 5 ± 0.06 mm | Antibacterial activity associated with fatty acids and sulfurous acid, 2-ethylhexyl isohexyl ester, eugenol, benzene and phthalic acid | [14] |
|                              |                           | 70% methanol | - | Eugenol, nonane, undecane, hept-2-ene, 2,4,4,6-tetramethyl, sulfurous acid, phthalic acid and 1,2-propanediol | - | 500 µg/mL | 6 ± 0.01 mm | Antibacterial activity associated with fatty acids and sulfurous acid, 2-ethylhexyl isohexyl ester,                                    | [14] |

|                              |                           |      |   |                                                                                                                                   |   |           |               |                                                                                                                                                                   |      |
|------------------------------|---------------------------|------|---|-----------------------------------------------------------------------------------------------------------------------------------|---|-----------|---------------|-------------------------------------------------------------------------------------------------------------------------------------------------------------------|------|
|                              |                           |      |   |                                                                                                                                   |   |           |               | eugenol,<br>benzene and<br>phthalic acid                                                                                                                          |      |
|                              |                           | DMSO | - | Eugenol, nonane,<br>undecane, hept-<br>2-ene, 2,4,4,6-<br>tetramethyl,<br>sulfurous acid,<br>phthalic acid and<br>1,2-propanediol | - | 100 µg/mL | 3 ± 0.00 mm   | Antibacterial<br>activity<br>associated with<br>fatty acids and<br>sulfurous acid,<br>2-ethylhexyl<br>isohexyl ester,<br>eugenol,<br>benzene and<br>phthalic acid | [14] |
|                              |                           | DMSO | - | Eugenol, nonane,<br>undecane, hept-<br>2-ene, 2,4,4,6-<br>tetramethyl,<br>sulfurous acid,<br>phthalic acid and<br>1,2-propanediol | - | 200 µg/mL | 4.5 ± 0.11 mm | Antibacterial<br>activity<br>associated with<br>fatty acids and<br>sulfurous acid,<br>2-ethylhexyl<br>isohexyl ester,<br>eugenol,<br>benzene and<br>phthalic acid | [14] |
| <i>Staphylococcus aureus</i> | <i>Hydropuntia edulis</i> | DMSO | - | Eugenol, nonane,<br>undecane, hept-<br>2-ene, 2,4,4,6-<br>tetramethyl,<br>sulfurous acid,<br>phthalic acid and<br>1,2-propanediol | - | 300 µg/mL | 5 ± 0.01      | Antibacterial<br>activity<br>associated with<br>fatty acids and<br>sulfurous acid,<br>2-ethylhexyl<br>isohexyl ester,<br>eugenol,<br>benzene and<br>phthalic acid | [14] |
|                              |                           | DMSO | - | Eugenol, nonane,<br>undecane, hept-<br>2-ene, 2,4,4,6-<br>tetramethyl,<br>sulfurous acid,<br>phthalic acid and<br>1,2-propanediol | - | 400 µg/mL | 5 ± 0.00      | Antibacterial<br>activity<br>associated with<br>fatty acids and<br>sulfurous acid,<br>2-ethylhexyl<br>isohexyl ester,<br>eugenol,                                 | [14] |

|                              |                              |                           |                  |                                                                                                               |   |              |            |                                                                                                                                                                     |      |
|------------------------------|------------------------------|---------------------------|------------------|---------------------------------------------------------------------------------------------------------------|---|--------------|------------|---------------------------------------------------------------------------------------------------------------------------------------------------------------------|------|
|                              |                              | DMSO                      | -                | Eugenol, nonane, undecane, hept-2-ene, 2,4,4,6-tetramethyl, sulfurous acid, phthalic acid and 1,2-propanediol | - | 500 µg/mL    | 6.5 ± 0.06 | benzene and phthalic acid<br>Antibacterial activity associated with fatty acids and sulfurous acid, 2-ethylhexyl isohexyl ester, eugenol, benzene and phthalic acid | [14] |
|                              | <i>Kappaphycus alvarezii</i> | Aqueous (gel-like liquid) | -                | Tannins, flavonoids, alkaloids, steroids and saponins.                                                        | - | 40 µg/mL     | 4 mm       | -                                                                                                                                                                   | [17] |
|                              |                              | Aqueous (gel-like liquid) | -                | Tannins, flavonoids, alkaloids, steroids and saponins.                                                        | - | 60 µg/mL     | 2 mm       | -                                                                                                                                                                   | [17] |
| <i>Staphylococcus aureus</i> | <i>Kappaphycus alvarezii</i> | Aqueous (gel-like liquid) | -                | Tannins, flavonoids, alkaloids, steroids and saponins.                                                        | - | 80 µg/mL     | 4 mm       | -                                                                                                                                                                   | [17] |
|                              |                              | Aqueous (gel-like liquid) | -                | Tannins, flavonoids, alkaloids, steroids and saponins.                                                        | - | 100 µg/mL    | 5 mm       | -                                                                                                                                                                   | [17] |
|                              | <i>Laminaria digitata</i>    | -                         | Spring           | -                                                                                                             | - | Disc thallus | 9 mm       | -                                                                                                                                                                   | [2]  |
|                              |                              | -                         | Summer           | -                                                                                                             | - | Disc thallus | 7,5 mm     | -                                                                                                                                                                   | [2]  |
|                              |                              | -                         | Autumn           | -                                                                                                             | - | Disc thallus | 6,5 mm     | -                                                                                                                                                                   | [2]  |
|                              |                              | -                         | Winter           | -                                                                                                             | - | Disc thallus | 16 mm      | -                                                                                                                                                                   | [2]  |
|                              |                              | -                         | Spring (Sterile) | -                                                                                                             | - | Disc thallus | 9 mm       | -                                                                                                                                                                   | [36] |
|                              |                              | -                         | Spring (Fertile) | -                                                                                                             | - | Disc thallus | 10 mm      | -                                                                                                                                                                   | [36] |
|                              | <i>Laurencia obtusa</i>      | -                         | Spring           | -                                                                                                             | - | Disc thallus | 6,5 mm     | -                                                                                                                                                                   | [2]  |
|                              |                              | -                         | Summer           | -                                                                                                             | - | Disc thallus | 7 mm       | -                                                                                                                                                                   | [2]  |
|                              |                              | -                         | Autumn           | -                                                                                                             | - | Disc thallus | 7 mm       | -                                                                                                                                                                   | [2]  |
|                              |                              | -                         | Winter           | -                                                                                                             | - | Disc thallus | 7 mm       | -                                                                                                                                                                   | [2]  |

|                              |                                   |               |        |                                                               |                                                       |              |         |                                                                                                                                                            |      |
|------------------------------|-----------------------------------|---------------|--------|---------------------------------------------------------------|-------------------------------------------------------|--------------|---------|------------------------------------------------------------------------------------------------------------------------------------------------------------|------|
|                              |                                   | Ethyl acetate | -      | -                                                             | -                                                     | 100 µL       | 0.48    | Data of inhibition not specified                                                                                                                           | [4]  |
|                              | <i>Lychaete pellucida</i>         | -             | Spring | -                                                             | -                                                     | Disc thallus | 0,5 mm  | -                                                                                                                                                          | [2]  |
|                              |                                   | -             | Summer | -                                                             | -                                                     | Disc thallus | 2 mm    | -                                                                                                                                                          | [2]  |
|                              |                                   | -             | Autumn | -                                                             | -                                                     | Disc thallus | 3 mm    | -                                                                                                                                                          | [2]  |
|                              | <i>Melanothamnus afaqhusainii</i> | Ethanol       | -      | -                                                             | -                                                     | 2 mg/disc    | 8 mm    | -                                                                                                                                                          | [12] |
|                              |                                   | Ethanol       | -      | -                                                             | -                                                     | 4 mg/disc    | 9 mm    | -                                                                                                                                                          | [12] |
|                              |                                   | Ethanol       | -      | -                                                             | -                                                     | 6 mg/disc    | 10 mm   | -                                                                                                                                                          | [12] |
|                              | <i>Membranoptera alata</i>        | -             | Spring | -                                                             | -                                                     | Disc thallus | 3 mm    | -                                                                                                                                                          | [2]  |
|                              |                                   | -             | Summer | -                                                             | -                                                     | Disc thallus | 2 mm    | -                                                                                                                                                          | [2]  |
|                              | <i>Mesogloia vermiculata</i>      | -             | Summer | -                                                             | -                                                     | Disc thallus | 3 mm    | -                                                                                                                                                          | [2]  |
|                              | <i>Odonthalia dentata</i>         | -             | Spring | -                                                             | -                                                     | Disc thallus | 15 mm   | -                                                                                                                                                          | [2]  |
|                              |                                   | -             | Summer | -                                                             | -                                                     | Disc thallus | 14,5 mm | -                                                                                                                                                          | [2]  |
|                              |                                   | -             | Autumn | -                                                             | -                                                     | Disc thallus | 16 mm   | -                                                                                                                                                          | [2]  |
|                              |                                   | -             | Winter | -                                                             | -                                                     | Disc thallus | 16 mm   | -                                                                                                                                                          | [2]  |
| <i>Staphylococcus aureus</i> | <i>Osmundea hybrida</i>           | -             | Spring | -                                                             | -                                                     | Disc thallus | 7 mm    | -                                                                                                                                                          | [2]  |
|                              |                                   | -             | Summer | -                                                             | -                                                     | Disc thallus | 6,5 mm  | -                                                                                                                                                          | [2]  |
|                              |                                   | -             | Autumn | -                                                             | -                                                     | Disc thallus | 6,5 mm  | -                                                                                                                                                          | [2]  |
|                              |                                   | -             | Winter | -                                                             | -                                                     | Disc thallus | 7 mm    | -                                                                                                                                                          | [2]  |
|                              | <i>Osmundea pinnatifida</i>       | -             | Spring | -                                                             | -                                                     | Disc thallus | 10 mm   | -                                                                                                                                                          | [2]  |
|                              |                                   | -             | Summer | -                                                             | -                                                     | Disc thallus | 9 mm    | -                                                                                                                                                          | [2]  |
|                              |                                   | -             | Autumn | -                                                             | -                                                     | Disc thallus | 10 mm   | -                                                                                                                                                          | [2]  |
|                              |                                   | -             | Winter | -                                                             | -                                                     | Disc thallus | 11 mm   | -                                                                                                                                                          | [2]  |
|                              | <i>Padina gymnospora</i>          | Methanol      | -      | Hydroxyl groups (O-H), alkyl group (C-H), (C=O), amine groups | C-H groups can be from mannuronic groups and gluronic | -            | 18.4 mm | The presence of reactive functional groups of N-H, N=O, O-H and C-O-S (protein, alkaloids and carbohydrates) are associated with microbial cell disrupting | [39] |



|                              |                                     |                   |                      |                                                                                      |   |                   |              |   |      |
|------------------------------|-------------------------------------|-------------------|----------------------|--------------------------------------------------------------------------------------|---|-------------------|--------------|---|------|
|                              | <i>Padina</i> sp.                   | Hexane            | -                    | -                                                                                    | - | 0.1 mL            | 4-7 mm       | - | [16] |
|                              | <i>Padina tetrastromatica</i>       | Ethanol           | -                    | Flavonoids and tannins                                                               | - | -                 | 6.33 ± 0.5   | - | [33] |
|                              | <i>Petrospongium berkeleyi</i>      | -                 | Summer               | -                                                                                    | - | Disc thallus      | 2 mm         | - | [2]  |
|                              |                                     | -                 | Autumn               | -                                                                                    | - | Disc thallus      | 3 mm         | - | [2]  |
|                              | <i>Phyllophora crispa</i>           | -                 | Spring               | -                                                                                    | - | Disc thallus      | 2,5 mm       | - | [2]  |
|                              | <i>Phyllophora pseudoceranoïdes</i> | -                 | Spring               | -                                                                                    | - | Disc thallus      | 4 mm         | - | [2]  |
|                              |                                     | -                 | Summer               | -                                                                                    | - | Disc thallus      | 1,5 mm       | - | [2]  |
|                              | <i>Plocamium cartilagineum</i>      | -                 | Summer (Cystocarpic) | -                                                                                    | - | Disc thallus      | 4 mm         | - | [36] |
|                              | <i>Polysiphonia stricta</i>         | -                 | Spring               | -                                                                                    | - | Disc thallus      | 10,5 mm      | - | [2]  |
|                              |                                     | -                 | Summer               | -                                                                                    | - | Disc thallus      | 10 mm        | - | [2]  |
|                              |                                     | -                 | Autumn               | -                                                                                    | - | Disc thallus      | 10,5 mm      | - | [2]  |
|                              |                                     | -                 | Winter               | -                                                                                    | - | Disc thallus      | 10,5 mm      | - | [2]  |
|                              | <i>Pterothamnion plumula</i>        | -                 | Spring               | -                                                                                    | - | Disc thallus      | 5 mm         | - | [2]  |
|                              |                                     | -                 | Summer               | -                                                                                    | - | Disc thallus      | 3 mm         | - | [2]  |
|                              |                                     | -                 | Autumn               | -                                                                                    | - | Disc thallus      | 3 mm         | - | [2]  |
|                              |                                     | -                 | Winter               | -                                                                                    | - | Disc thallus      | 1 mm         | - | [2]  |
| <i>Staphylococcus aureus</i> | <i>Ptilophora subcostata</i>        | Dry powder        | -                    | -                                                                                    | - | 60 µl             | >10 mm       | - | [18] |
|                              | <i>Rhodomela confervoides</i>       | -                 | Summer               | -                                                                                    | - | Disc thallus      | 4,5 mm       | - | [2]  |
|                              |                                     | -                 | Autumn               | -                                                                                    | - | Disc thallus      | 3 mm         | - | [2]  |
|                              |                                     | -                 | Winter               | -                                                                                    | - | Disc thallus      | 3,5 mm       | - | [2]  |
|                              |                                     | -                 | Spring               | -                                                                                    | - | Disc thallus      | 1 mm         | - | [2]  |
|                              | <i>Saccharina japonica</i>          | SC-CO2 + Ethanol  | -                    | High total fatty acids content, Elaidic acid, eicosapentaenoic acid and fucoxanthin  | - | 10 µL (100 µg/mL) | 18 ± 0.50 mm | - | [40] |
|                              |                                     | Acetone: Methanol | -                    | High total fatty acids content + Elaidic acid, eicosapentaenoic acid and fucoxanthin | - | 10 µL (100 µg/mL) | 20 ± 0.50 mm | - | [40] |

|                              |                                |                                          |        |                                                                                                    |   |                   |                |   |      |
|------------------------------|--------------------------------|------------------------------------------|--------|----------------------------------------------------------------------------------------------------|---|-------------------|----------------|---|------|
|                              |                                | Hexane                                   | -      | Elaidic acid, eicosapentaenoic acid and fucoxanthin                                                | - | 10 µL (100 µg/mL) | 8 ± 0.40 mm    | - | [40] |
|                              |                                | Ethanol                                  | -      | Elaidic acid, eicosapentaenoic acid and fucoxanthin                                                | - | 10 µL (100 µg/mL) | 6 ± 0.05 mm    | - | [40] |
|                              | <i>Saccharina latissima</i>    | -                                        | Spring | -                                                                                                  | - | Disc thallus      | 8,5 mm         | - | [2]  |
|                              |                                | -                                        | Winter | -                                                                                                  | - | Disc thallus      | 11 mm          | - | [2]  |
|                              | <i>Sargassum aquifolium</i>    | Fresh material (Ethanol_Liquid fraction) | -      | Alkaloids, triterpenoid glycosides, phenols, saponins and volatile oils                            | - | -                 | 39.40 ± 1.13 % | - | [41] |
|                              |                                | Fresh material (Ethanol_Solid fraction)  | -      | Alkaloids, triterpenoid glycosides, phenols, saponins and volatile oils                            | - | -                 | 38.72 ± 1.78 % | - | [41] |
| <i>Staphylococcus aureus</i> | <i>Sargassum aquifolium</i>    | Dry material (Ethanol_Liquid fraction)   | -      | Alkaloids, triterpenoid glycosides, phenols, saponins and volatile oils                            | - | -                 | 30.42 ± 4.89 % | - | [41] |
|                              |                                | Dry material (Ethanol_Solid fraction)    | -      | Alkaloids, triterpenoid glycosides, phenols, saponins and volatile oils                            | - | -                 | 29.51 ± 4.47 % | - | [41] |
|                              | <i>Sargassum cristaefolium</i> | Hexane                                   | -      | Phenol, 1-nonadecene, myristic acid, 9-tricosene (Z)-, palmitic acid, 1-hexacosene and oleic acid. | - | 2 mg/mL           | 3.88±0.33 mm   | - | [26] |
|                              | <i>Sargassum cristaefolium</i> | Serial extraction with hexane, and       | -      | Phenol, 1-hexadecene, myristic acid, 9-                                                            | - | 2 mg/mL           | 3.42±0.47 mm   | - | [26] |
|                              |                                |                                          |        |                                                                                                    |   |                   |                |   |      |

|  |                                 |                                                                          |        |                                                                                                                                                                                         |   |                   |              |                                  |      |
|--|---------------------------------|--------------------------------------------------------------------------|--------|-----------------------------------------------------------------------------------------------------------------------------------------------------------------------------------------|---|-------------------|--------------|----------------------------------|------|
|  |                                 | then ethyl acetate                                                       |        | tricosene (Z)-, neophytadiene, phytol, cyclotetracosane, palmitic acid, and oleic acid.                                                                                                 |   |                   |              |                                  |      |
|  | <i>Sargassum cristaefolium</i>  | Serial extraction with hexane, ethyl acetate and methanol, respectively. | -      | Phenol, methyl dihydrojasmonate, 3-azepan-1-yl-benzo[d]isothiazole 1,1-dioxide, hexyl cinnamic aldehyde, 9-tricosene(Z)-, palmitic acid, 1-hexacosene, hexatriacontane, and 1-docosene. | - | 2 mg/mL           | 3.08±0.14 mm | -                                | [26] |
|  | <i>Sargassum desfontainesii</i> | n-hexane                                                                 | Autumn | -                                                                                                                                                                                       | - | 5 µL              | 8 mm         | -                                | [9]  |
|  |                                 | Methanol                                                                 | Autumn | -                                                                                                                                                                                       | - | 5 µL              | 10 mm        | -                                | [9]  |
|  | <i>Sargassum filipendula</i>    | Ethyl acetate                                                            | -      | -                                                                                                                                                                                       | - | 100 µL            | 0.50         | Data of inhibition not specified | [4]  |
|  | <i>Sargassum horneri</i>        | SC-CO2 + Ethanol                                                         | -      | High total fatty acids content, palmitic acid, eicosapentaenoic acid and fucoxanthin                                                                                                    | - | 10 µL (100 µg/mL) | 20 ± 0.45 mm | -                                | [40] |
|  |                                 | Acetone + methanol                                                       | -      | High total fatty acids content, palmitic acid, eicosapentaenoic acid and fucoxanthin                                                                                                    | - | 10 µL (100 µg/mL) | 24 ± 0.10 mm | -                                | [40] |
|  | <i>Sargassum horneri</i>        | Hexane                                                                   | -      | Palmitic acid, eicosapentaenoic acid and fucoxanthin                                                                                                                                    | - | 10 µL (100 µg/mL) | 10 ± 0.15 mm | -                                | [40] |
|  |                                 | Ethanol                                                                  | -      | Palmitic acid, eicosapentaenoic                                                                                                                                                         | - | 10 µL (100 µg/mL) | 7 ± 0.04 mm  | -                                | [40] |

|                              |                              |                                      |   |                                         |                                                                                                    |                   |                |                                  |      |
|------------------------------|------------------------------|--------------------------------------|---|-----------------------------------------|----------------------------------------------------------------------------------------------------|-------------------|----------------|----------------------------------|------|
|                              |                              |                                      |   | acid and fucoxanthin                    |                                                                                                    |                   |                |                                  |      |
|                              | <i>Sargassum horridum</i>    | Ethanol                              | - | -                                       | Steroid compounds (such as fucosterol and its derivative saringosterol) present in all brown algae | 20 mg/ml (100 µL) | 10.6 %         | -                                | [41] |
| <i>Staphylococcus aureus</i> | <i>Sargassum hystrix</i>     | Ethyl acetate partition of Methanols | - | -                                       | -                                                                                                  | 100 µL            | 0.52           | Data of inhibition not specified | [4]  |
|                              | <i>Sargassum lanceolatum</i> | Ethanol                              | - | -                                       | -                                                                                                  | 2 mg/disc         | 8 mm           | -                                | [12] |
|                              |                              | Ethanol                              | - | -                                       | -                                                                                                  | 4 mg/disc         | 8 mm           | -                                | [12] |
|                              |                              | Ethanol                              | - | -                                       | -                                                                                                  | 6 mg/disc         | 9 mm           | -                                | [12] |
|                              | <i>Sargassum muticum</i>     | Methanol                             | - | Phenolic compounds (mainly flavonoids). | -                                                                                                  | 300 mg/mL         | 22.33 mm       | -                                | [20] |
|                              |                              | Water                                | - | -                                       | -                                                                                                  | 300 mg/mL         | 9.67 mm        | -                                | [20] |
|                              | <i>Sargassum polycystum</i>  | Methanol                             | - | -                                       | -                                                                                                  | 50 µL             | 20 mm          | -                                | [30] |
|                              |                              | Ethanol                              | - | Flavonoids and tannins                  | -                                                                                                  | -                 | 7.67 ± 1.15 mm | -                                | [33] |
|                              |                              | Acetone                              | - | Tannins, steroids.                      | Tannins, flavonoids, terpenoids, cardiac glycosydes, phlobatannins and steroids                    | -                 | 11             | Graphical data (no units)        | [19] |
|                              |                              | Ethanol                              | - | Steroids                                | Flavonoids, terpenoids, cardiac glycosydes and steroids                                            | -                 | 9              | Graphical data (no units)        | [19] |
|                              |                              | water extract                        | - | -                                       | Phenols, amino acids and proteins                                                                  | -                 | 4              | Graphical data (no units)        | [19] |
|                              | <i>Sargassum sp.</i>         | Hexane                               | - | -                                       | -                                                                                                  | 0.1 mL            | 4-7 mm         | -                                | [16] |

|                              |                             |                           |   |                                                                                                                              |   |           |       |                |      |
|------------------------------|-----------------------------|---------------------------|---|------------------------------------------------------------------------------------------------------------------------------|---|-----------|-------|----------------|------|
|                              | <i>Sargassum tenerrimum</i> | Water                     | - | -                                                                                                                            | - | -         | 1 mm  | Graphical data | [21] |
|                              | <i>Sargassum tenerrimum</i> | Methanol                  | - | Amino acids, alkaloids, carbohydrates, saponins, sterols, terpenoids, proteins, and phenolic compounds (flavonoids, tannins) | - | -         | 13 mm | Graphical data | [21] |
|                              |                             | Aqueous (gel-like liquid) | - | Tannins, flavonoids, alkaloids, steroids, saponins, phlorotannins and terpenoids.                                            | - | 40 µg/mL  | 1 mm  | -              | [17] |
| <i>Staphylococcus aureus</i> | <i>Sargassum tenerrimum</i> | Aqueous (gel-like liquid) | - | Tannins, flavonoids, alkaloids, steroids, saponins, phlorotannins and terpenoids.                                            | - | 60 µg/mL  | 3 mm  | -              | [17] |
|                              |                             | Aqueous (gel-like liquid) | - | Tannins, flavonoids, alkaloids, steroids, saponins, phlorotannins and terpenoids.                                            | - | 80 µg/mL  | 4 mm  | -              | [17] |
|                              |                             | Aqueous (gel-like liquid) | - | Tannins, flavonoids, alkaloids, steroids, saponins, phlorotannins and terpenoids.                                            | - | 100 µg/mL | 5 mm  | -              | [17] |

|  |                             |                 |   |                                                                                                                                                                                                                                         |   |                |                    |                                                                                                                                                                         |      |
|--|-----------------------------|-----------------|---|-----------------------------------------------------------------------------------------------------------------------------------------------------------------------------------------------------------------------------------------|---|----------------|--------------------|-------------------------------------------------------------------------------------------------------------------------------------------------------------------------|------|
|  | <i>Sargassum tenerrimum</i> | Methanol        | - | Cholest-5-en-3-ol, 24-propylidene-, (3 $\alpha$ )-; 1,2-Benzenedicarboxylic acid, diisooctyl ester; Hentriacontane; 1-Docosene; 1-Nonadecene; 1-Hexadecanol; 1,2-Benzenediol; Benzoic acid.                                             | - | Not specified. | 20.3 $\pm$ 1.5 mm  | 1,2-benzenedicarboxylic acid, diisooctyl ester, 1-docosene, 1,2-benzenediol and benzoic acid are indicated as the responsible compounds for the antibacterial activity. | [22] |
|  | <i>Sargassum tenerrimum</i> | Petroleum ether | - | Benzoic acid, 3,5-dicyclohexyl-4-hydroxy-, methyl ester; Isomethadone; Cholesterol; Squalene; 9-Hexadecenoic acid, eicosyl ester, (Z)-; 17-Pentatriacontene; Dasycarpidan-1-methanol, acetate (ester); Hexadecanoic acid, methyl ester. | - | Not specified. | 17.8 $\pm$ 0.98 mm | Hexadecenoic acid, methyl ester, 17-pentatriacontene, dasycarpian-1-methanol, and acetate are indicated as the responsible compounds for the antibacterial activity.    | [22] |
|  | <i>Sargassum wightii</i>    | Acetone         | - | Steroids, terpenoids, glycosides, alkaloids, flavonoids, tannins and saponins                                                                                                                                                           | - | -              | 13 $\pm$ 1.6 mm    | -                                                                                                                                                                       | [24] |
|  |                             | Diethyl ether   | - | Steroids, terpenoids, glycosides, flavonoids and saponins                                                                                                                                                                               | - | -              | 16.3 $\pm$ 1.2 mm  | -                                                                                                                                                                       | [24] |

|                              |                                     |                                  |        |                                                                                  |   |                          |              |   |      |
|------------------------------|-------------------------------------|----------------------------------|--------|----------------------------------------------------------------------------------|---|--------------------------|--------------|---|------|
|                              |                                     | Methanol                         | -      | Steroids,<br>terpenoids,<br>alkaloids,<br>flavonoids,<br>tannins and<br>saponins | - | -                        | 16±1.3 mm    | - | [24] |
| <i>Staphylococcus aureus</i> | <i>Sphondylothamnion multifidum</i> | -                                | Summer | -                                                                                | - | Disc thallus             | 21 mm        | - | [2]  |
|                              |                                     | -                                | Autumn | -                                                                                | - | Disc thallus             | 22,5 mm      | - | [2]  |
|                              | <i>Stoechospermum</i> sp.           | Ethanol                          | -      | -                                                                                | - | 50 µl, 75 µl, 100 µl     | 8 mm         | - | [31] |
|                              |                                     | Ethanol:chloroform (1:1)         | -      | -                                                                                | - | 50 µl, 75 µl, 100 µl     | 3 mm         | - | [31] |
|                              | <i>Styopodium zonale</i>            | <i>n</i> -hexane                 | Autumn | -                                                                                | - | 5 µL                     | 12 mm        | - | [9]  |
|                              |                                     | <i>n</i> -hexane                 | Winter | -                                                                                | - | 5 µL                     | 10 mm        | - | [9]  |
|                              |                                     | Ethyl acetate                    | Autumn | -                                                                                | - | 5 µL                     | 9 mm         | - | [9]  |
|                              |                                     | Methanol                         | Autumn | -                                                                                | - | 5 µL                     | 11 mm        | - | [9]  |
|                              | <i>Symphyocladia parasitica</i>     | -                                | Summer | -                                                                                | - | Disc thallus             | 3,5 mm       | - | [2]  |
|                              | <i>Turbinaria ornata</i>            | Methanol                         | -      | -                                                                                | - | 0.1 mL                   | 2-3 mm       | - | [16] |
|                              |                                     | Hexane                           | -      | -                                                                                | - | 0.1 mL                   | 2-3 mm       | - | [16] |
|                              |                                     | Ethanol                          | -      | High content in flavonoids and tannins                                           | - | -                        | 9.3 ± 0.7 mm | - | [33] |
|                              | <i>Ulva lactuca</i>                 | Ethanol (crude)                  | -      | Abundance of alcohols and phenols                                                | - | 25 µL (holding capacity) | 5 ± 4.08 mm  | - | [32] |
|                              |                                     | Fraction 1 (Chloroform:methanol) | -      | -                                                                                | - | 25 µL (holding capacity) | 4 ± 0.07 mm  | - | [32] |
|                              |                                     | Fraction 2 (Chloroform:methanol) | -      | -                                                                                | - | 25 µL (holding capacity) | 5 ± 0.06 mm  | - | [32] |
|                              |                                     | Fraction 3 (Chloroform:methanol) | -      | -                                                                                | - | 25 µL (holding capacity) | 4 ± 0.88 mm  | - | [32] |
|                              |                                     | -                                | Autumn | -                                                                                | - | Disc thallus             | 2 mm         | - | [2]  |
|                              |                                     | -                                | Winter | -                                                                                | - | Disc thallus             | 6,5 mm       | - | [2]  |

|                              |                   |               |   |   |   |                                |        |                                                                                                                                                                      |      |
|------------------------------|-------------------|---------------|---|---|---|--------------------------------|--------|----------------------------------------------------------------------------------------------------------------------------------------------------------------------|------|
| <i>Staphylococcus aureus</i> | <i>Ulva linza</i> | Methanol      | - | - | - | 25 µL                          | 0-5 mm | -                                                                                                                                                                    | [37] |
|                              |                   | Diethyl ether | - | - | - | 25 µL                          | 0-5 mm | -                                                                                                                                                                    | [37] |
|                              |                   | Chloroform    | - | - | - | 25 µL                          | 15 mm  | -                                                                                                                                                                    | [37] |
|                              |                   | Methanol      | - | - | - | 250 µg/mL<br>(extract in DMSO) | 10 mm  | Antibacterial activity reported in bromophenols, carbonyls, halogenated aliphatic compounds, terpenes, isoprenylated and brominated hydroquinones, and phlorotannins | [13] |
|                              |                   | Methanol      | - | - | - | 500 µg/mL<br>(extract in DMSO) | 11 mm  | Antibacterial activity reported in bromophenols, carbonyls, halogenated aliphatic compounds, terpenes, isoprenylated and brominated hydroquinones, and phlorotannins | [13] |
|                              |                   | Methanol      | - | - | - | 750 µg/mL<br>(extract in DMSO) | 14 mm  | Antibacterial activity reported in bromophenols, carbonyls, halogenated aliphatic compounds, terpenes,                                                               | [13] |



|                              |                             |                  |                  |   |   |                              |         |                                                                                                                                                                      |      |
|------------------------------|-----------------------------|------------------|------------------|---|---|------------------------------|---------|----------------------------------------------------------------------------------------------------------------------------------------------------------------------|------|
|                              |                             |                  |                  |   |   |                              |         | isoprenylated and brominated hydroquinones, and phlorotannins                                                                                                        |      |
| <i>Staphylococcus aureus</i> | <i>Ulva linza</i>           | Methanol         | -                | - | - | 1000 µg/mL (extract in DMSO) | 18 mm   | Antibacterial activity reported in bromophenols, carbonyls, halogenated aliphatic compounds, terpenes, isoprenylated and brominated hydroquinones, and phlorotannins | [13] |
|                              | <i>Ulva rigida</i>          | <i>n</i> -hexane | Winter           | - | - | 5 µL                         | 8 mm    | -                                                                                                                                                                    | [9]  |
|                              |                             | Methanol         | Autumn           | - | - | 5 µL                         | 9 mm    | -                                                                                                                                                                    | [9]  |
|                              |                             | Methanol         | Winter           | - | - | 5 µL                         | 10 mm   | -                                                                                                                                                                    | [9]  |
|                              | <i>Ulva sp.</i>             | Methanol         | -                | - | - | 58 µl, 75 µl, 100 µl         | 2 mm    | -                                                                                                                                                                    | -    |
|                              | <i>Vertebrata byssoides</i> | -                | Spring           | - | - | Disc thallus                 | 11 mm   | -                                                                                                                                                                    | [2]  |
|                              | <i>Vertebrata byssoides</i> | -                | Summer           | - | - | Disc thallus                 | 8,5 mm  | -                                                                                                                                                                    | [2]  |
|                              |                             | -                | Autumn           | - | - | Disc thallus                 | 9 mm    | -                                                                                                                                                                    | [2]  |
|                              | <i>Vertebrata fucoides</i>  | -                | Spring           | - | - | Disc thallus                 | 11 mm   | -                                                                                                                                                                    | [2]  |
|                              |                             | -                | Summer           | - | - | Disc thallus                 | 11,5 mm | -                                                                                                                                                                    | [2]  |
|                              |                             | -                | Autumn           | - | - | Disc thallus                 | 11 mm   | -                                                                                                                                                                    | [2]  |
|                              |                             | -                | Winter           | - | - | Disc thallus                 | 11 mm   | -                                                                                                                                                                    | [2]  |
|                              | <i>Vertebrata lanosa</i>    | -                | Spring           | - | - | Disc thallus                 | 18 mm   | -                                                                                                                                                                    | [2]  |
|                              |                             | -                | Summer           | - | - | Disc thallus                 | 18 mm   | -                                                                                                                                                                    | [2]  |
|                              |                             | -                | Autumn           | - | - | Disc thallus                 | 19 mm   | -                                                                                                                                                                    | [2]  |
|                              |                             | -                | Winter           | - | - | Disc thallus                 | 18,5 mm | -                                                                                                                                                                    | [2]  |
|                              |                             | -                | Spring (Sterile) | - | - | Disc thallus                 | 18 mm   | -                                                                                                                                                                    | [36] |
|                              |                             | -                | Spring (Male)    | - | - | Disc thallus                 | 17 mm   | -                                                                                                                                                                    | [36] |

|                                             |                              |                                                   |                                             |   |                      |                |               |                  |      |
|---------------------------------------------|------------------------------|---------------------------------------------------|---------------------------------------------|---|----------------------|----------------|---------------|------------------|------|
| <i>Staphylococcus aureus</i>                |                              | -                                                 | Summer (Sterile)                            | - | -                    | Disc thallus   | 18 mm         | -                | [36] |
|                                             |                              | -                                                 | Summer (Cystocarpic)                        | - | -                    | Disc thallus   | 18 mm         | -                | [36] |
|                                             | <i>Vertebrata lanosa</i>     | -                                                 | Summer (Tetrasporic)                        | - | -                    | Disc thallus   | 18,5 mm       | -                | [36] |
|                                             | <i>Vertebrata nigra</i>      | -                                                 | Spring                                      | - | -                    | Disc thallus   | 10 mm         | -                | [2]  |
|                                             |                              | -                                                 | Summer                                      | - | -                    | Disc thallus   | 11 mm         | -                | [2]  |
|                                             |                              | -                                                 | Autumn                                      | - | -                    | Disc thallus   | 11 mm         | -                | [2]  |
|                                             |                              | -                                                 | Winter                                      | - | -                    | Disc thallus   | 11 mm         | -                | [2]  |
|                                             | <i>Vertebrata thuyoides</i>  | -                                                 | Spring                                      | - | -                    | Disc thallus   | 4,5 mm        | -                | [2]  |
|                                             |                              | -                                                 | Summer                                      | - | -                    | Disc thallus   | 6,5 mm        | -                | [2]  |
|                                             |                              | -                                                 | Autumn                                      | - | -                    | Disc thallus   | 6 mm          | -                | [2]  |
|                                             |                              | -                                                 | Winter                                      | - | -                    | Disc thallus   | 5 mm          | -                | [2]  |
| <i>Xanthomonas oryzae</i> pv. <i>oryzae</i> | <i>Chnoospora minima</i>     | Methanol                                          | -                                           | - | Polar substances     | 50 µL (250 µg) | 3 mm          | Graphical values | [42] |
|                                             |                              | Saponified                                        | -                                           | - | Polar substances     | 50 µL (250 µg) | 2 mm          | Graphical values | [42] |
|                                             |                              | Unsaponified                                      | -                                           | - | Polar substances     | 50 µL (250 µg) | 2 mm          | Graphical values | [42] |
|                                             |                              | Lipophilic                                        | -                                           | - | Polar substances     | 50 µL (250 µg) | 2 mm          | Graphical values | [42] |
|                                             |                              | Hexane:ethyl acetate (4:6 v/v)                    | Unsaponified fraction<br>Fraction 0.40 (UV) | - | -                    | 85 µL (250 µg) | 3.3 ± 0.53 mm | -                | [43] |
|                                             |                              | Hexane:diethyl ether:1% acetic acid (5:4:1 v/v/v) | Methanol Fraction 0.42 (iodine)             | - | -                    | 86 µL (250 µg) | 7 mm          | Graphical values | [43] |
|                                             | <i>Chnoospora minima</i>     | Hexane:diethyl ether:1% acetic acid (5:4:1 v/v/v) | Methanol Fraction 0.78 (UV)                 | - | -                    | 87 µL (250 µg) | 9 mm          | Graphical values | [43] |
|                                             |                              | Hexane:diethyl ether:1% acetic acid (5:4:1 v/v/v) | Lipophilic fraction Fraction 0.37 (iodine)  | - | -                    | 88 µL (250 µg) | 2 mm          | Graphical values | [43] |
|                                             |                              | Hexane:diethyl ether:1% acetic acid (5:4:1 v/v/v) | Lipophilic fraction Fraction 0.55 (UV)      | - | -                    | 89 µL (250 µg) | 4 mm          | Graphical values | [43] |
|                                             | <i>Gracilaria blodgettii</i> | Hexane:ethyl acetate (4:6 v/v)                    | Petroleum ether extracts Fraction 0.21      | - | -                    | 50 µL (250 µg) | 6.6 ± 0.58 mm | -                | [43] |
|                                             |                              | Petroleum ether                                   | -                                           | - | Non-polar substances | 50 µL (250 µg) | 5 mm          | Graphical values | [42] |

|                                             |                              |                                |                                           |   |                      |                |               |                  |      |
|---------------------------------------------|------------------------------|--------------------------------|-------------------------------------------|---|----------------------|----------------|---------------|------------------|------|
| <i>Xanthomonas oryzae</i> pv. <i>oryzae</i> |                              | Diethyl ether                  | -                                         | - | Non-polar substances | 50 µL (250 µg) | 3 mm          | Graphical values | [42] |
|                                             |                              | Chloroform                     | -                                         | - | Non-polar substances | 50 µL (250 µg) | 3 mm          | Graphical values | [42] |
|                                             | <i>Gracilaria blodgettii</i> | Chloroform: Methanol           | -                                         | - | Non-polar substances | 50 µL (250 µg) | 3 mm          | Graphical values | [42] |
|                                             |                              | Saponified                     | -                                         | - | Non-polar substances | 50 µL (250 µg) | 4 mm          | Graphical values | [42] |
|                                             |                              | Unsaponified                   | -                                         | - | Non-polar substances | 50 µL (250 µg) | 6 mm          | Graphical values | [42] |
|                                             |                              | Lipophilic                     | -                                         | - | Non-polar substances | 50 µL (250 µg) | 5 mm          | Graphical values | [42] |
|                                             |                              | Hexane:ethyl acetate (4:6 v/v) | Unsaponified fraction<br>Fraction 0.20    | - | -                    | 51 µL (250 µg) | 3.6 ± 0.58 mm | -                | [43] |
|                                             |                              | Hexane:ethyl acetate (4:6 v/v) | Unsaponified fraction<br>Fraction 0.42    | - | -                    | 52 µL (250 µg) | 8.3 ± 0.56 mm | -                | [43] |
|                                             | <i>Hydropuntia edulis</i>    | Petroleum ether                | -                                         | - | Non-polar substances | 50 µL (250 µg) | 6 mm          | Graphical values | [42] |
|                                             |                              | Diethyl ether                  | -                                         | - | Non-polar substances | 50 µL (250 µg) | 5 mm          | Graphical values | [42] |
|                                             |                              | Chloroform                     | -                                         | - | Non-polar substances | 50 µL (250 µg) | 4 mm          | Graphical values | [42] |
|                                             |                              | Chloroform:methanol            | -                                         | - | Non-polar substances | 50 µL (250 µg) | 3 mm          | Graphical values | [42] |
|                                             | <i>Hydropuntia edulis</i>    | Saponified                     | -                                         | - | Non-polar substances | 50 µL (250 µg) | 5 mm          | Graphical values | [42] |
|                                             |                              | Unsaponified                   | -                                         | - | Non-polar substances | 50 µL (250 µg) | 7 mm          | Graphical values | [42] |
|                                             |                              | Lipophilic                     | -                                         | - | Non-polar substances | 50 µL (250 µg) | 6 mm          | Graphical values | [42] |
|                                             |                              | Hexane:ethyl acetate (4:6 v/v) | Petroleum ether extracts<br>Fraction 0.48 | - | -                    | 53 µL (250 µg) | 8 ± 1.0 mm    | -                | [43] |
|                                             |                              | Hexane:ethyl acetate (4:6 v/v) | Unsaponified fraction<br>Fraction 0.38    | - | -                    | 54 µL (250 µg) | 10 mm         | Graphical values | [43] |
|                                             |                              | Hexane:ethyl acetate (4:6 v/v) | Unsaponified fraction                     | - | -                    | 55 µL (250 µg) | 2 mm          | Graphical values | [43] |

|                                             |                           |                                |                                           |   |                      |                |      |                  |      |
|---------------------------------------------|---------------------------|--------------------------------|-------------------------------------------|---|----------------------|----------------|------|------------------|------|
|                                             |                           |                                | Fraction 0.46                             |   |                      |                |      |                  |      |
|                                             | <i>Hypnea musciformis</i> | Petroleum ether                | -                                         | - | Non-polar substances | 50 µL (250 µg) | 4 mm | Graphical values | [42] |
| <i>Xanthomonas oryzae</i> pv. <i>oryzae</i> | <i>Hypnea musciformis</i> | Diethyl ether                  | -                                         | - | Non-polar substances | 50 µL (250 µg) | 3 mm | Graphical values | [42] |
|                                             |                           | Chloroform                     | -                                         | - | Non-polar substances | 50 µL (250 µg) | 2 mm | Graphical values | [42] |
|                                             |                           | Chloroform:methanol            | -                                         | - | Non-polar substances | 50 µL (250 µg) | 2 mm | Graphical values | [42] |
|                                             |                           | Saponified                     | -                                         | - | Non-polar substances | 50 µL (250 µg) | 3 mm | Graphical values | [42] |
|                                             |                           | Unsaponified                   | -                                         | - | Non-polar substances | 50 µL (250 µg) | 4 mm | Graphical values | [42] |
|                                             |                           | Lipophilic                     | -                                         | - | Non-polar substances | 50 µL (250 µg) | 4 mm | Graphical values | [42] |
|                                             |                           | Hexane:ethyl acetate (4:6 v/v) | Petroleum ether extracts<br>Fraction 0.20 | - | -                    | 60 µL (250 µg) | 4 mm | Graphical values | [43] |
|                                             |                           | Hexane:ethyl acetate (4:6 v/v) | Petroleum ether extracts<br>Fraction 0.32 | - | -                    | 61 µL (250 µg) | 2 mm | Graphical values | [43] |
|                                             |                           | Hexane:ethyl acetate (4:6 v/v) | Unsaponified fraction<br>Fraction 0.34    | - | -                    | 62 µL (250 µg) | 5 mm | Graphical values | [43] |
|                                             |                           | Hexane:ethyl acetate (4:6 v/v) | Unsaponified fraction<br>Fraction 0.53    | - | -                    | 63 µL (250 µg) | 4 mm | Graphical values | [43] |
|                                             | <i>Hypnea valentiae</i>   | Petroleum ether                | -                                         | - | Non-polar substances | 50 µL (250 µg) | 5 mm | Graphical values | [42] |
|                                             |                           | Diethyl ether                  | -                                         | - | Non-polar substances | 50 µL (250 µg) | 3 mm | Graphical values | [42] |
|                                             |                           | Chloroform                     | -                                         | - | Non-polar substances | 50 µL (250 µg) | 3 mm | Graphical values | [42] |
|                                             |                           | Chloroform: Methanol           | -                                         | - | Non-polar substances | 50 µL (250 µg) | 3 mm | Graphical values | [42] |
|                                             |                           | Saponified                     | -                                         | - | Non-polar substances | 50 µL (250 µg) | 3 mm | Graphical values | [42] |
|                                             |                           | Unsaponified                   | -                                         | - | Non-polar substances | 50 µL (250 µg) | 5 mm | Graphical values | [42] |

|                                             |                           |                                                   |                                               |   |                      |                |               |                  |      |
|---------------------------------------------|---------------------------|---------------------------------------------------|-----------------------------------------------|---|----------------------|----------------|---------------|------------------|------|
| <i>Xanthomonas oryzae</i> pv. <i>oryzae</i> |                           | Lipophilic                                        | -                                             | - | Non-polar substances | 50 µL (250 µg) | 4 mm          | Graphical values | [42] |
|                                             |                           | Hexane:ethyl acetate (4:6 v/v)                    | Petroleum ether extracts<br>Fraction 0.23     | - | -                    | 64 µL (250 µg) | 4 mm          | Graphical values | [43] |
|                                             | <i>Hypnea valentiae</i>   | Hexane:ethyl acetate (4:6 v/v)                    | Petroleum ether extracts<br>Fraction 0.35     | - | -                    | 65 µL (250 µg) | 6 mm          | Graphical values | [43] |
|                                             |                           | Hexane:ethyl acetate (4:6 v/v)                    | Unsaponified fraction<br>Fraction 0.31        | - | -                    | 66 µL (250 µg) | 6 mm          | Graphical values | [43] |
|                                             |                           | Hexane:ethyl acetate (4:6 v/v)                    | Unsaponified fraction<br>Fraction 0.44        | - | -                    | 67 µL (250 µg) | 3 mm          | Graphical values | [43] |
|                                             | <i>Padina boergesenii</i> | Chloroform                                        | -                                             | - | Polar substances     | 50 µL (250 µg) | 3 mm          | Graphical values | [42] |
|                                             |                           | Methanol                                          | -                                             | - | Polar substances     | 50 µL (250 µg) | 9 mm          | Graphical values | [42] |
|                                             |                           | Ethanol                                           | -                                             | - | Polar substances     | 50 µL (250 µg) | 4 mm          | Graphical values | [42] |
|                                             |                           | Chloroform:methanol                               | -                                             | - | Polar substances     | 50 µL (250 µg) | 3 mm          | Graphical values | [42] |
|                                             |                           | Saponified                                        | -                                             | - | Polar substances     | 50 µL (250 µg) | 4 mm          | Graphical values | [42] |
|                                             |                           | Unsaponified                                      | -                                             | - | Polar substances     | 50 µL (250 µg) | 5 mm          | Graphical values | [42] |
|                                             |                           | Lipophilic                                        | -                                             | - | Polar substances     | 50 µL (250 µg) | 6 mm          | Graphical values | [42] |
|                                             |                           | Hexane:diethyl ether:1% acetic acid (5:4:1 v/v/v) | Methanol<br>Fraction 0.41 (UV)                | - | -                    | 68 µL (250 µg) | 3.0 ± 0.0 mm  | -                | [43] |
|                                             |                           | Hexane:diethyl ether:1% acetic acid (5:4:1 v/v/v) | Methanol<br>Fraction 0.44 (iodine)            | - | -                    | 69 µL (250 µg) | 8.3 ± 0.58 mm | -                | [43] |
|                                             |                           | Hexane:ethyl acetate (4:6 v/v)                    | Unsaponified fraction<br>Fraction 0.17 (UV)   | - | -                    | 70 µL (250 µg) | 1 mm          | Graphical values | [43] |
|                                             |                           | Hexane:ethyl acetate (4:6 v/v)                    | Unsaponified fraction<br>Fraction 0.39 (UV)   | - | -                    | 71 µL (250 µg) | 8 mm          | Graphical values | [43] |
|                                             |                           | Hexane:diethyl ether:1% acetic acid (5:4:1 v/v/v) | Lipophilic fraction<br>Fraction 0.12 (UV)     | - | -                    | 72 µL (250 µg) | 6.0 ± 0.0 mm  | -                | [43] |
|                                             |                           | Hexane:diethyl ether:1% acetic acid (5:4:1 v/v/v) | Lipophilic fraction<br>Fraction 0.20 (iodine) | - | -                    | 73 µL (250 µg) | 1 mm          | Graphical values | [43] |

|                                             |                           |                                                   |                                            |   |                  |                |                |                  |      |
|---------------------------------------------|---------------------------|---------------------------------------------------|--------------------------------------------|---|------------------|----------------|----------------|------------------|------|
|                                             |                           | Hexane:diethyl ether:1% acetic acid (5:4:1 v/v/v) | Lipophilic fraction Fraction 0.31 (UV)     | - | -                | 74 µL (250 µg) | 1 mm           | Graphical values | [43] |
| <i>Xanthomonas oryzae</i> pv. <i>oryzae</i> | <i>Padina boergesenii</i> | Hexane:diethyl ether:1% acetic acid (5:4:1 v/v/v) | Lipophilic fraction Fraction 0.34 (UV)     | - | -                | 75 µL (250 µg) | 4 mm           | Graphical values | [43] |
|                                             |                           | Hexane:diethyl ether:1% acetic acid (5:4:1 v/v/v) | Lipophilic fraction Fraction 0.40 (iodine) | - | -                | 76 µL (250 µg) | 3 mm           | Graphical values | [43] |
|                                             |                           | Chloroform                                        | -                                          | - | Polar substances | 50 µL (250 µg) | 4 mm           | Graphical values | [42] |
|                                             | <i>Sargassum wightii</i>  | Methanol                                          | -                                          | - | Polar substances | 50 µL (250 µg) | 11 mm          | Graphical values | [42] |
|                                             |                           | Ethanol                                           | -                                          | - | Polar substances | 50 µL (250 µg) | 6 mm           | Graphical values | [42] |
|                                             |                           | Chloroform:methanol                               | -                                          | - | Polar substances | 50 µL (250 µg) | 5 mm           | Graphical values | [42] |
|                                             |                           | Saponified                                        | -                                          | - | Polar substances | 50 µL (250 µg) | 5 mm           | Graphical values | [42] |
|                                             |                           | Unsaponified                                      | -                                          | - | Polar substances | 50 µL (250 µg) | 6 mm           | Graphical values | [42] |
|                                             |                           | Lipophilic                                        | -                                          | - | Polar substances | 50 µL (250 µg) | 8 mm           | Graphical values | [42] |
|                                             |                           | Hexane:diethyl ether:1% acetic acid (5:4:1 v/v/v) | Methanol Fraction 0.29 (iodine)            | - | -                | 77 µL (250 µg) | 11.8 ± 0.53 mm | -                | [43] |
|                                             |                           | Hexane:diethyl ether:1% acetic acid (5:4:1 v/v/v) | Methanol Fraction 0.70 (UV)                | - | -                | 78 µL (250 µg) | 4 mm           | Graphical values | [43] |
|                                             |                           | Hexane:diethyl ether:1% acetic acid (5:4:1 v/v/v) | Methanol Fraction 0.80 (UV)                | - | -                | 79 µL (250 µg) | 3 mm           | Graphical values | [43] |
|                                             |                           | Hexane:diethyl ether:1% acetic acid (5:4:1 v/v/v) | Methanol Fraction 0.87 (iodine)            | - | -                | 80 µL (250 µg) | 4 mm           | Graphical values | [43] |
|                                             |                           | Hexane:diethyl ether:1% acetic acid (5:4:1 v/v/v) | Methanol Fraction 0.94 (UV)                | - | -                | 81 µL (250 µg) | 4 mm           | Graphical values | [43] |
|                                             |                           | Hexane:ethyl acetate (4:6 v/v)                    | Unsaponified fraction Fraction 0.27 (UV)   | - | -                | 82 µL (250 µg) | 7.0 ± 0.0 mm   | -                | [43] |
|                                             |                           | Hexane:diethyl ether:1% acetic acid (5:4:1 v/v/v) | Lipophilic fraction Fraction 0.26 (iodine) | - | -                | 83 µL (250 µg) | 4 mm           | Graphical values | [43] |

|                                             |                           |                                                   |                                         |   |                      |                              |               |                  |      |
|---------------------------------------------|---------------------------|---------------------------------------------------|-----------------------------------------|---|----------------------|------------------------------|---------------|------------------|------|
|                                             |                           | Hexane:diethyl ether:1% acetic acid (5:4:1 v/v/v) | Lipophilic fraction Fraction 0.61 (UV)  | - | -                    | 84 µL (250 µg)               | 8.8 ± 0.57 mm | -                | [43] |
| <i>Xanthomonas oryzae</i> pv. <i>oryzae</i> | <i>Sargassum wightii</i>  | Methanol                                          | Fraction Hexane:Ethyl acetate (80:20)   | - | -                    | 50 µL (100 µg of substances) | 5.0±1.0 mm    | -                | [44] |
|                                             |                           | Methanol                                          | Fraction Hexane:Ethyl acetate (60:40)   | - | -                    | 50 µL (100 µg of substances) | 6.0±1.0 mm    | -                | [44] |
|                                             |                           | Methanol                                          | Fraction Hexane:Ethyl acetate (20:80)   | - | -                    | 50 µL (100 µg of substances) | 3.0±0.56 mm   | -                | [44] |
|                                             |                           | Methanol                                          | Fraction Ethyl acetate:methanol (100:0) | - | -                    | 50 µL (100 µg of substances) | 5.3±0.56 mm   | -                | [44] |
|                                             |                           | Methanol                                          | Fraction Ethyl acetate:methanol (40:60) | - | -                    | 50 µL (100 µg of substances) | 13.5±1.2 mm   | -                | [44] |
|                                             | <i>Spyridia hypnoides</i> | Petroleum ether                                   | -                                       | - | Non-polar substances | 50 µL (250 µg)               | 3 mm          | Graphical values | [42] |
|                                             |                           | Diethyl ether                                     | -                                       | - | Non-polar substances | 50 µL (250 µg)               | 2 mm          | Graphical values | [42] |
|                                             |                           | Chloroform                                        | -                                       | - | Non-polar substances | 50 µL (250 µg)               | 2 mm          | Graphical values | [42] |
|                                             |                           | Chloroform:Methanol                               | -                                       | - | Non-polar substances | 50 µL (250 µg)               | 2 mm          | Graphical values | [42] |
|                                             |                           | Saponified                                        | -                                       | - | Non-polar substances | 50 µL (250 µg)               | 2 mm          | Graphical values | [42] |
|                                             |                           | Unsaponified                                      | -                                       | - | Non-polar substances | 50 µL (250 µg)               | 4 mm          | Graphical values | [42] |
|                                             |                           | Lipophilic                                        | -                                       | - | Non-polar substances | 50 µL (250 µg)               | 2 mm          | Graphical values | [42] |
|                                             |                           | Hexane:ethyl acetate (4:6 v/v)                    | Unsaponified fraction Fraction 0.26     | - | -                    | 56 µL (250 µg)               | 4.3 ± 0.58 mm | -                | [43] |
|                                             |                           | Hexane:ethyl acetate (4:6 v/v)                    | Unsaponified fraction Fraction 0.33     | - | -                    | 57 µL (250 µg)               | 3 ± 1.0 mm    | -                | [43] |
|                                             |                           | Hexane:ethyl acetate (4:6 v/v)                    | Petroleum ether extracts Fraction 0.24  | - | -                    | 58 µL (250 µg)               | 4,5 mm        | Graphical values | [43] |

|                                             |                            |                                                   |                                               |   |                      |                |               |                  |      |
|---------------------------------------------|----------------------------|---------------------------------------------------|-----------------------------------------------|---|----------------------|----------------|---------------|------------------|------|
|                                             |                            | Hexane:ethyl acetate (4:6 v/v)                    | Petroleum ether extracts<br>Fraction 0.46     | - | -                    | 59 µL (250 µg) | 4 mm          | Graphical values | [43] |
| <i>Xanthomonas oryzae</i> pv. <i>oryzae</i> | <i>Turbinaria conoides</i> | Hexane:ethyl acetate (4:6 v/v)                    | Unsaponified fraction<br>Fraction 0.18 (UV)   | - | -                    | 90 µL (250 µg) | 3.6 ± 0.58 mm | -                | [43] |
|                                             |                            | Hexane:diethyl ether:1% acetic acid (5:4:1 v/v/v) | Methanol<br>Fraction 0.22 (iodine)            | - | -                    | 91 µL (250 µg) | 8 mm          | Graphical values | [43] |
|                                             |                            | Hexane:diethyl ether:1% acetic acid (5:4:1 v/v/v) | Methanol<br>Fraction 0.44 (iodine)            | - | -                    | 92 µL (250 µg) | 4 mm          | Graphical values | [43] |
|                                             |                            | Hexane:diethyl ether:1% acetic acid (5:4:1 v/v/v) | Methanol<br>Fraction 0.57 (UV)                | - | -                    | 93 µL (250 µg) | 5 mm          | Graphical values | [43] |
|                                             |                            | Hexane:diethyl ether:1% acetic acid (5:4:1 v/v/v) | Lipophilic fraction<br>Fraction 0.09 (UV)     | - | -                    | 94 µL (250 µg) | 3 mm          | Graphical values | [43] |
|                                             |                            | Hexane:diethyl ether:1% acetic acid (5:4:1 v/v/v) | Lipophilic fraction<br>Fraction 0.22 (iodine) | - | -                    | 95 µL (250 µg) | 3 mm          | Graphical values | [43] |
|                                             |                            | Chloroform                                        | -                                             | - | Polar substances     | 50 µL (250 µg) | 4 mm          | Graphical values | [42] |
|                                             |                            | Methanol                                          | -                                             | - | Polar substances     | 50 µL (250 µg) | 9 mm          | Graphical values | [42] |
|                                             |                            | Ethanol                                           | -                                             | - | Polar substances     | 50 µL (250 µg) | 5 mm          | Graphical values | [42] |
|                                             | <i>Turbinaria conoides</i> | Chloroform:methanol                               | -                                             | - | Polar substances     | 50 µL (250 µg) | 4 mm          | Graphical values | [42] |
|                                             |                            | Saponified                                        | -                                             | - | Polar substances     | 50 µL (250 µg) | 5 mm          | Graphical values | [42] |
|                                             |                            | Unsaponified                                      | -                                             | - | Polar substances     | 50 µL (250 µg) | 5 mm          | Graphical values | [42] |
|                                             |                            | Lipophilic                                        | -                                             | - | Polar substances     | 50 µL (250 µg) | 6 mm          | Graphical values | [42] |
|                                             | <i>Ulva flexuosa</i>       | Petroleum ether                                   | -                                             | - | Non-polar substances | 50 µL (250 µg) | 11 mm         | Graphical values | [42] |
|                                             |                            | Diethyl ether                                     | -                                             | - | Non-polar substances | 50 µL (250 µg) | 10 mm         | Graphical values | [42] |
|                                             |                            | Chloroform                                        | -                                             | - | Non-polar substances | 50 µL (250 µg) | 4 mm          | Graphical values | [42] |
|                                             |                            | Chloroform:methanol                               | -                                             | - | Non-polar substances | 50 µL (250 µg) | 5 mm          | Graphical values | [42] |
|                                             |                            | Saponified                                        | -                                             | - | Non-polar substances | 50 µL (250 µg) | 6 mm          | Graphical values | [42] |



|                                             |                      |                                |                                           |   |                      |                 |                |                  |      |
|---------------------------------------------|----------------------|--------------------------------|-------------------------------------------|---|----------------------|-----------------|----------------|------------------|------|
| <i>Xanthomonas oryzae</i> pv. <i>oryzae</i> | <i>Ulva flexuosa</i> | Unsaponified                   | -                                         | - | Non-polar substances | 50 µL (250 µg)  | 12 mm          | Graphical values | [42] |
|                                             |                      | Lipophilic                     | -                                         | - | Non-polar substances | 50 µL (250 µg)  | 8 mm           | Graphical values | [42] |
|                                             |                      | Hexane:ethyl acetate (4:6 v/v) | Petroleum ether extracts<br>Fraction 0.27 | - | -                    | 96 µL (250 µg)  | 12.3 ± 0.56 mm | -                | [43] |
|                                             |                      | Hexane:ethyl acetate (4:6 v/v) | Petroleum ether extracts<br>Fraction 0.49 | - | -                    | 97 µL (250 µg)  | 10 mm          | Graphical values | [43] |
|                                             |                      | Hexane:ethyl acetate (4:6 v/v) | Petroleum ether extracts<br>Fraction 0.66 | - | -                    | 98 µL (250 µg)  | 4 mm           | Graphical values | [43] |
|                                             |                      | Hexane:ethyl acetate (4:6 v/v) | Unsaponified fraction<br>Fraction 0.30    | - | -                    | 99 µL (250 µg)  | 13.7 ± 1.4 mm  | -                | [43] |
|                                             |                      | Hexane:ethyl acetate (4:6 v/v) | Unsaponified fraction<br>Fraction 0.39    | - | -                    | 100 µL (250 µg) | 2 mm           | Graphical values | [43] |
|                                             | <i>Ulva lactuca</i>  | Petroleum ether                | -                                         | - | Non-polar substances | 50 µL (250 µg)  | 2 mm           | Graphical values | [42] |
|                                             |                      | Diethyl ether                  | -                                         | - | Non-polar substances | 50 µL (250 µg)  | 2 mm           | Graphical values | [42] |
|                                             |                      | Saponified                     | -                                         | - | Non-polar substances | 50 µL (250 µg)  | 2 mm           | Graphical values | [42] |
|                                             |                      | Unsaponified                   | -                                         | - | Non-polar substances | 50 µL (250 µg)  | 3 mm           | Graphical values | [42] |
|                                             |                      | Lipophilic                     | -                                         | - | Non-polar substances | 50 µL (250 µg)  | 2 mm           | Graphical values | [42] |
|                                             |                      | Hexane:ethyl acetate (4:6 v/v) | Petroleum ether extracts<br>Fraction 0.34 | - | -                    | 101 µL (250 µg) | 6.3 ± 0.56 mm  | -                | [43] |
|                                             |                      | Hexane:ethyl acetate (4:6 v/v) | Petroleum ether extracts<br>Fraction 0.20 | - | -                    | 102 µL (250 µg) | 2 mm           | Graphical values | [43] |
|                                             |                      | Hexane:ethyl acetate (4:6 v/v) | Unsaponified fraction<br>Fraction 0.29    | - | -                    | 50 µL (250 µg)  | 2.0 ± 1.0 mm   | -                | [43] |
|                                             |                      | Hexane:ethyl acetate (4:6 v/v) | Unsaponified fraction<br>Fraction 0.34    | - | -                    | 50 µL (250 µg)  | 7.5 ± 1.41 mm  | -                | [43] |

|                                             |                     |                                |                            |   |   |                |               |   |      |
|---------------------------------------------|---------------------|--------------------------------|----------------------------|---|---|----------------|---------------|---|------|
| <i>Xanthomonas oryzae</i> pv. <i>oryzae</i> | <i>Ulva lactuca</i> | Hexane:ethyl acetate (4:6 v/v) | Unsaponified Fraction 0.66 | - | - | 50 µL (250 µg) | 3.3 ± 0.56 mm | - | [43] |
|---------------------------------------------|---------------------|--------------------------------|----------------------------|---|---|----------------|---------------|---|------|

\*- Species not found in AlgaeBase database (<https://www.algaebase.org/>).

**Table S2.** Detailed information of antibacterial activity reported from disc diffusion method modified (bacterial-agar medium).

| Antibacterial activity   Disc diffusion method modified (Bacterial-agar medium)*2 |                                     |                   |                       |                      |                                         |            |           |
|-----------------------------------------------------------------------------------|-------------------------------------|-------------------|-----------------------|----------------------|-----------------------------------------|------------|-----------|
| Phytopathogenic bacteria                                                          | Macroalgae source                   | Solvent used      | Extract concentration | Halo inhibition (mm) | Medium                                  | Incubation | Reference |
| <i>Pseudomonas aeruginosa</i>                                                     | <i>Sargassum fusiforme</i>          | Ethanolic extract | 10 mg/mL              | 7.75 ± 0.5 mm        | Nutrient agar medium (agar basal layer) | 37°C, 24h  | [45]      |
| <i>Staphylococcus aureus</i>                                                      | <i>Ulva australis</i>               | Ethanolic extract |                       | 10.00 ± 0.00 mm      |                                         |            |           |
|                                                                                   | <i>Ulva prolifera</i>               |                   |                       | 7.67 ± 0.29 mm       |                                         |            |           |
|                                                                                   | <i>Gloiopeltis furcata</i>          |                   |                       | 10.83 ± 0.58 mm      |                                         |            |           |
|                                                                                   | <i>Gracilariopsis lemaneiformis</i> |                   |                       | 12.50 ± 0.87 mm      |                                         |            |           |
|                                                                                   | <i>Ishige okamurae</i>              |                   |                       | 7.33 ± 0.58 mm       |                                         |            |           |
|                                                                                   | <i>Sargassum fusiforme</i>          |                   |                       | 10.83 ± 0.29 mm      |                                         |            |           |

\*<sup>2</sup>- Methodology described in Li et al., 2018 [45].

**Table S3.** Detailed information of antibacterial activity reported from liquid-dilution method.

| Liquid-dilution method* <sup>2</sup> |                             |                        |                       |                       |                                     |                                                |                      |                       |           |
|--------------------------------------|-----------------------------|------------------------|-----------------------|-----------------------|-------------------------------------|------------------------------------------------|----------------------|-----------------------|-----------|
| Phytopathogenic bacteria             | Macroalgae source           | Extraction solvent     | Collection conditions | Extract concentration | Bacterial growth (% of the control) | Initial bacterial suspension                   | Culture medium       | Incubation conditions | Reference |
| <i>Erwinia carotovora</i>            | <i>Lessonia trabeculata</i> | 50% Ethanolic extracts | Summer                | 10,000 ppm            | 50%                                 | 1 µL (10 <sup>5</sup> –10 <sup>6</sup> UFC/mL) | Müller-Hinton medium | 27°C, 6h              | [46]      |
|                                      |                             | 50% Ethanolic extracts | Autumn                | 10,000 ppm            | 50-60%                              | 1 µL (10 <sup>5</sup> –10 <sup>6</sup> UFC/mL) | Müller-Hinton medium | 27°C, 6h              | [46]      |
| <i>Pseudomonas syringae</i>          | <i>Lessonia trabeculata</i> | 50% Ethanolic extracts | Summer                | 10,000 ppm            | 40%                                 | 1 µL (10 <sup>5</sup> –10 <sup>6</sup> UFC/mL) | Müller-Hinton medium | 27°C, 6h              | [46]      |
|                                      |                             | 50% Ethanolic extracts | Autumn                | 10,000 ppm            | 40%                                 | 1 µL (10 <sup>5</sup> –10 <sup>6</sup> UFC/mL) | Müller-Hinton medium | 27°C, 6h              | [46]      |
|                                      | <i>Macrocystis pyrifera</i> | 50% Ethanolic extracts | Springtime            | 10,000 ppm            | 50%                                 | 1 µL (10 <sup>5</sup> –10 <sup>6</sup> UFC/mL) | Müller-Hinton medium | 27°C, 6h              | [46]      |

\*<sup>2</sup>- Methodology described in Jiménez et al., 2011 [46].

**Table S4.** Detailed information of antibacterial activity from microdilution method.

| Microdilution method          |                              |                           |                                                          |                                          |                 |                       |                               |           |
|-------------------------------|------------------------------|---------------------------|----------------------------------------------------------|------------------------------------------|-----------------|-----------------------|-------------------------------|-----------|
| Phytopathogenic bacteria      | Macroalgae source            | Solvent used              | Composition of the extract                               | Possible composition (comparative works) | MIC             | Incubation conditions | Notes                         | Reference |
| <i>Bacillus cereus</i>        | <i>Sargassum vulgare</i>     | Methanol                  | Alga with high content in carbohydrate                   | -                                        | 500 µg/mL       | 12h, 35°C             | -                             | [47]      |
|                               |                              |                           |                                                          | -                                        | 1000 µg/mL      | 24h, 35°C             | MBC (tryptic soy agar plates) | [47]      |
| <i>Bacillus subtilis</i>      | <i>Chaetomorpha linum</i>    | Ethyl acetate             | -                                                        | -                                        | 5 mg/mL         | 24h, 37°C             | -                             | [8]       |
|                               |                              | Acetone                   | -                                                        | -                                        | 1.25 mg/mL      | 24h, 37°C             | -                             | [8]       |
|                               | <i>Osmundaria serrata</i>    | Lanosol ethyl ether (LEE) | -                                                        | -                                        | 0.15±0.06 mg/mL | 37±2°C, 24h           | -                             | [48]      |
|                               |                              | Lanosol ethyl ether (LEE) | -                                                        | -                                        | 1.00±0.00 mg/mL | 37±2°C, 24h           | MBC                           | [48]      |
|                               | <i>Padina gymnospora</i>     | Hexane                    | -                                                        | -                                        | 5 mg/mL         | 24h, 37°C             | -                             | [8]       |
|                               |                              | Ethyl acetate             | -                                                        | -                                        | 5 mg/mL         | 24h, 37°C             | -                             | [8]       |
|                               |                              | Acetone                   | -                                                        | -                                        | 2.5 mg/mL       | 24h, 37°C             | -                             | [8]       |
|                               | <i>Sargassum wightii</i>     | Hexane                    | -                                                        | -                                        | 5 mg/mL         | 24h, 37°C             | -                             | [8]       |
|                               |                              | Ethyl acetate             | -                                                        | -                                        | 2.5 mg/mL       | 24h, 37°C             | -                             | [8]       |
|                               |                              | Acetone                   | -                                                        | -                                        | 2.5 mg/mL       | 24h, 37°C             | -                             | [8]       |
| <i>Erwinia amylovora</i>      | <i>Chaetomorpha linum</i>    | Ethyl acetate             | -                                                        | -                                        | 2.5 mg/mL       | 24h, 37°C             | -                             | [8]       |
|                               |                              | Acetone                   | -                                                        | -                                        | 1.25 mg/mL      | 24h, 37°C             | -                             | [8]       |
|                               | <i>Padina gymnospora</i>     | Hexane                    | -                                                        | -                                        | 5 mg/mL         | 24h, 37°C             | -                             | [8]       |
|                               |                              | Ethyl acetate             | -                                                        | -                                        | 5 mg/mL         | 24h, 37°C             | -                             | [8]       |
|                               |                              | Acetone                   | -                                                        | -                                        | 2.5 mg/mL       | 24h, 37°C             | -                             | [8]       |
|                               | <i>Sargassum wightii</i>     | Hexane                    | -                                                        | -                                        | 5 mg/mL         | 24h, 37°C             | -                             | [8]       |
|                               |                              | Ethyl acetate             | -                                                        | -                                        | 5 mg/mL         | 24h, 37°C             | -                             | [8]       |
|                               |                              | Acetone                   | -                                                        | -                                        | 2.5 mg/mL       | 24h, 37°C             | -                             | [8]       |
| <i>Pseudomonas aeruginosa</i> | <i>Chaetomorpha linum</i>    | Hexane                    | -                                                        | -                                        | 5 mg/mL         | 24h, 37°C             | -                             | [8]       |
|                               | <i>Fucus spiralis</i>        | Phlorotannins purified    | -                                                        | -                                        | 31.3 mg/mL      | 37°C, 18-24h          | -                             | [49]      |
|                               | <i>Gongolaria nodicaulis</i> | Phlorotannins purified    | -                                                        | -                                        | 31.3 mg/mL      | 37°C, 18-24h          | -                             | [49]      |
|                               | <i>Grateloupia livida</i>    | Petroleum ether           | Organic acid ester, fatty acids, sterol, amide compounds | -                                        | 4 mg/ml         | 24h, 37°C             | -                             | [50]      |

|                               |                                 |                           |                                                               |                                        |                 |                 |                                                     |      |
|-------------------------------|---------------------------------|---------------------------|---------------------------------------------------------------|----------------------------------------|-----------------|-----------------|-----------------------------------------------------|------|
|                               | <i>Osmundaria serrata</i>       | Lanosol ethyl ether (LEE) | -                                                             | -                                      | 0.42±0.08 mg/mL | 37±2°C, 24h     | -                                                   | [48] |
|                               |                                 | Lanosol ethyl ether (LEE) | -                                                             | -                                      | 0.42±0.08 mg/mL | 37±2°C, 24h     | MBC                                                 | [48] |
| <i>Pseudomonas aeruginosa</i> | <i>Padina gymnospora</i>        | Ethyl acetate             | -                                                             | -                                      | 2.5 mg/mL       | 24h, 37°C       | -                                                   | [8]  |
|                               |                                 | Acetone                   | -                                                             | -                                      | 1.25 mg/mL      | 24h, 37°C       | -                                                   | [8]  |
|                               |                                 | Methanol                  | Fatty acids and their derivatives                             | -                                      | 10 µg/mL        | 48h, 30°C       | -                                                   | [51] |
|                               | <i>Sargassum wightii</i>        | Ethyl acetate             | -                                                             | -                                      | 2.5 mg/mL       | 24h, 37°C       | -                                                   | [8]  |
|                               |                                 | Acetone                   | -                                                             | -                                      | 2.5 mg/mL       | 24h, 37°C       | -                                                   | [8]  |
|                               | <i>Sarconema filiforme</i>      | Acetone                   | Alkaloids, phenolic compounds (flavonoids), proteins, sugars  | -                                      | 12.5 µg/mL      | 24h, 37°C       | MBC                                                 | [52] |
| <i>Pseudomonas</i> sp.        | <i>Sarconema filiforme</i>      | Acetone                   | Alkaloids, phenolic compounds (flavonoids), proteins, sugars  | -                                      | 25 µg/mL        | 24h, 37°C       | MBC                                                 | [52] |
|                               |                                 | Diethyl ether             | -                                                             | -                                      | -               | 24h, 37°C       | -                                                   | [52] |
|                               |                                 | Diethyl ether             | -                                                             | -                                      | -               | 24h, 37°C       | MBC                                                 | [52] |
|                               |                                 | Acetone                   | Phenolic compounds (flavonoids, coumarins, tannins), steroids | -                                      | 25 µg/mL        | 24h, 37°C       | -                                                   | [52] |
|                               | <i>Sargassum wightii</i>        | Acetone                   | Phenolic compounds (flavonoids, coumarins, tannins) steroids  | -                                      | 50 µg/mL        | 24h, 37°C       | MBC                                                 | [52] |
|                               |                                 | Acetone                   | Phenolic compounds (flavonoids, coumarins, tannins) steroids  | -                                      | 50 µg/mL        | 24h, 37°C       | MBC                                                 | [52] |
| <i>Staphylococcus aureus</i>  | <i>Ascophyllum nodosum</i>      | Acetone extract           | -                                                             | Polyphenolic compounds                 | 0.20 mg/mL      | 24h, 37°C       | -                                                   | [53] |
|                               | <i>Bangia fuscopurpurea</i>     | <i>n</i> -butanol         | -                                                             | -                                      | 500 µg/mL       | Overnight, 37°C | -                                                   | [34] |
|                               |                                 | Aqueous                   | -                                                             | -                                      | 500 µg/mL       | Overnight, 37°C | -                                                   | [34] |
|                               | <i>Bifurcaria bifurcata</i>     | Dichloromethane extract   | Lipophilic fraction (trimethylsilyl derivatives)              | -                                      | 2048 µg/mL      | 24h, 37°C       | Synergistic effect with gentamicin and tetracycline | [54] |
|                               |                                 | Dichloromethane extract   | Lipophilic fraction (trimethylsilyl derivatives)              | -                                      | 1024 µg/mL      | 24h, 37°C       | -                                                   | [54] |
|                               | <i>Callithamnion granulatum</i> | Chloroform                | -                                                             | Fatty acids (free or as acylglycerols) | 250 µg/mL       | Overnight, 37°C | -                                                   | [34] |
|                               |                                 | <i>n</i> -butanol         | -                                                             | -                                      | 500 µg/mL       | Overnight, 37°C | -                                                   | [34] |
|                               |                                 |                           |                                                               |                                        |                 |                 |                                                     |      |

|                              |                                                 |                      |                                                                                                                                                                                        |                                                                                                               |           |                 |                                                   |      |
|------------------------------|-------------------------------------------------|----------------------|----------------------------------------------------------------------------------------------------------------------------------------------------------------------------------------|---------------------------------------------------------------------------------------------------------------|-----------|-----------------|---------------------------------------------------|------|
| <i>Staphylococcus aureus</i> | <i>Callithamnion granulatum</i>                 | Aqueous              | -                                                                                                                                                                                      | -                                                                                                             | 500 µg/mL | Overnight, 37°C | -                                                 | [34] |
|                              |                                                 | Chloroform           | -                                                                                                                                                                                      | Fatty acids (free or as acylglycerols)                                                                        | 500 µg/mL | Overnight, 37°C | -                                                 | [34] |
|                              |                                                 | <i>n</i> -butanol    | -                                                                                                                                                                                      | Monobrominated phenols                                                                                        | 125 µg/mL | Overnight, 37°C | -                                                 | [34] |
|                              |                                                 | “Volatile compounds” | -                                                                                                                                                                                      | Aldehydes, free fatty acids, and phenol                                                                       | 250 µg/mL | Overnight, 37°C | -                                                 | [34] |
|                              | <i>Carradoriella elongata</i>                   | Chloroform           | -                                                                                                                                                                                      | Fatty acids (free or as acylglycerols)                                                                        | 250 µg/mL | Overnight, 37°C | -                                                 | [34] |
|                              |                                                 | <i>n</i> -butanol    | -                                                                                                                                                                                      | Dibrominated phenols                                                                                          | 250 µg/mL | Overnight, 37°C | -                                                 | [34] |
|                              |                                                 | Aqueous              | -                                                                                                                                                                                      | -                                                                                                             | 250 µg/mL | Overnight, 37°C | -                                                 | [34] |
|                              |                                                 | “Volatile compounds” | -                                                                                                                                                                                      | Aldehydes, free fatty acids, and phenolic compounds                                                           | 250 µg/mL | Overnight, 37°C | Defensive compounds concentrated in the volatiles | [34] |
|                              |                                                 | <i>n</i> -butanol    | α-O-methylanosol                                                                                                                                                                       | -                                                                                                             | 125 µg/mL | Overnight, 37°C | -                                                 | [34] |
|                              | <i>Ceramium siliculosum</i> var. <i>elegans</i> | Chloroform           | -                                                                                                                                                                                      | Fatty acids (free or as acylglycerols)                                                                        | 250 µg/mL | Overnight, 37°C | -                                                 | [34] |
|                              |                                                 | <i>n</i> -butanol    | 1,2-dihydroxy ethane sulfonate,                                                                                                                                                        | -                                                                                                             | 250 µg/mL | Overnight, 37°C | -                                                 | [34] |
|                              |                                                 | Aqueous              | -                                                                                                                                                                                      | -                                                                                                             | 250 µg/mL | Overnight, 37°C | -                                                 | [34] |
|                              | <i>Colpomenia peregrina</i>                     | <i>n</i> -butanol    | Mono-, di-, and tricarboxylic acids                                                                                                                                                    | Phenolic acids and their derivatives, an ester of phosphoric acid and significant amounts of free fatty acids | 500 µg/mL | Overnight, 37°C | -                                                 | [34] |
|                              | <i>Colpomenia peregrina</i>                     | “Volatile compounds” | Alkylated phenols, free lower fatty acids, benzoic acid, esters of acetic, formic acids, carvacrol, chlorinated hydrocarbons, sulfur containing compounds (methyl benzene sulfonamide) | -                                                                                                             | 500 µg/mL | Overnight, 37°C | -                                                 | [34] |
|                              | <i>Cystoseira compressa</i>                     | Ethanol (50%)        | High content of Palmitoleic acid isomer a; Hexadecenoic                                                                                                                                | -                                                                                                             | 5 mg/mL   | 24h             | Collected in June (Minimal                        | [55] |

|                              |  |               |                                                                                                                                                                                                                                                                                                               |   |           |     |                                                                          |      |
|------------------------------|--|---------------|---------------------------------------------------------------------------------------------------------------------------------------------------------------------------------------------------------------------------------------------------------------------------------------------------------------|---|-----------|-----|--------------------------------------------------------------------------|------|
|                              |  |               | acid; Oleic acid; Heptadecanoic acid; Octadecanoic acid; Myristoleic acid methyl ester; 2-(1,2,2,2-Tetrahydroxyethoxy)ethane-1,1,1,2-tetrol; 1a,9b-Dihydrophenanthro[9,10-b]oxirene-2,3,4,7,8,9-hexacarbonitrile; D-Sorbitol; 9-Heptadecanoic acid; among others.                                             |   |           |     | bactericidal concentration is equal to MIC)                              |      |
| <i>Staphylococcus aureus</i> |  | Ethanol (50%) | High content of Palmitoleic acid isomer a; Hexadecenoic acid; Oleic acid; Heptadecanoic acid; Octadecanoic acid; Myristoleic acid methyl ester; 2-(1,2,2,2-Tetrahydroxyethoxy)ethane-1,1,1,2-tetrol; 1a,9b-Dihydrophenanthro[9,10-b]oxirene-2,3,4,7,8,9-hexacarbonitrile; 9-Heptadecanoic acid; among others. | - | 2.5 mg/mL | 24h | Collected in July (Minimal bactericidal concentration is equal to MIC)   | [55] |
|                              |  | Ethanol (50%) | High content of Palmitoleic acid isomer a; Hexadecenoic acid; Oleic acid; Heptadecanoic acid; Octadecanoic acid; Myristoleic acid methyl ester; 2-(1,2,2,2-Tetrahydroxyethoxy)ethane-1,1,1,2-tetrol; 1a,9b-Dihydrophenanthro[9,10-b]oxirene-2,3,4,7,8,9-hexacarbonitrile; 9-Heptadecanoic acid; among others. | - | 2.5 mg/mL | 24h | Collected in August (Minimal bactericidal concentration is equal to MIC) | [55] |



|                              |                              |                        |                                                                          |                                                                                                               |            |                 |                                                   |      |
|------------------------------|------------------------------|------------------------|--------------------------------------------------------------------------|---------------------------------------------------------------------------------------------------------------|------------|-----------------|---------------------------------------------------|------|
| <i>Staphylococcus aureus</i> | <i>Ellisolandia elongata</i> | Chloroform             | -                                                                        | Fatty acids (free or as acylglycerols)                                                                        | 500 µg/mL  | Overnight, 37°C | -                                                 | [34] |
|                              |                              | "Volatile compounds"   | Phenol, 3,4-dihydroxy benzaldehyde, benzoic acid, monoterpene eucalyptol | -                                                                                                             | 500 µg/mL  | Overnight, 37°C | -                                                 | [34] |
|                              | <i>Ericaria crinita</i>      | Chloroform             | -                                                                        | -                                                                                                             | 250 µg/mL  | Overnight, 37°C | -                                                 | [34] |
|                              |                              | <i>n</i> -butanol      | Mono-, di-, and tricarboxylic acids                                      | Phenolic acids and their derivatives, an ester of phosphoric acid and significant amounts of free fatty acids | 250 µg/mL  | Overnight, 37°C | -                                                 | [34] |
|                              |                              | Aqueous                | -                                                                        | -                                                                                                             | 500 µg/mL  | Overnight, 37°C | -                                                 | [34] |
|                              | <i>Ericaria selaginoides</i> | Phlorotannins purified | -                                                                        | -                                                                                                             | 15,6 mg/mL | 37°C, 18-24h    | -                                                 | [49] |
|                              | <i>Fucus spiralis</i>        | Phlorotannins purified | -                                                                        | -                                                                                                             | 7,8 mg/mL  | 37°C, 18-24h    | -                                                 | [49] |
|                              | <i>Gelidium spinosum</i>     | <i>n</i> -butanol      | 1,2-dihydroxy ethane sulfonate                                           | Esters of phosphoric acid (1,2-dihydroxy ethane sulfonate)                                                    | 250 µg/mL  | Overnight, 37°C | -                                                 | [34] |
|                              |                              | Aqueous                | -                                                                        | -                                                                                                             | 250 µg/mL  | Overnight, 37°C | -                                                 | [34] |
|                              |                              | "Volatile compounds"   | Aldehydes                                                                | -                                                                                                             | 125 µg/mL  | Overnight, 37°C | -                                                 | [34] |
|                              | <i>Gongolaria nodicaulis</i> | Phlorotannins purified | -                                                                        | -                                                                                                             | 7,8 mg/mL  | 37°C, 18-24h    | -                                                 | [49] |
|                              | <i>Gongolaria usneoides</i>  | Phlorotannins purified | -                                                                        | -                                                                                                             | 15,6 mg/mL | 37°C, 18-24h    | -                                                 | [49] |
|                              | <i>Grateloupia livida</i>    | Petroleum ether        | Organic acid ester, fatty acids, sterol, amide compounds                 | -                                                                                                             | 2 mg/ml    | 24h, 37°C       | -                                                 | [50] |
|                              | <i>Jania virgata</i>         | Chloroform             | -                                                                        | Fatty acids (free or as acylglycerols)                                                                        | 250 µg/mL  | Overnight, 37°C | -                                                 | [34] |
|                              |                              | <i>n</i> -butanol      | -                                                                        | Monocarboxylic acids                                                                                          | 125 µg/mL  | Overnight, 37°C | -                                                 | [34] |
|                              |                              | "Volatile compounds"   | Fatty acid methyl esters                                                 | -                                                                                                             | 125 µg/mL  | Overnight, 37°C | Defensive compounds concentrated in the volatiles | [34] |

|                              |                              |                           |                                                                                                                                                                                        |                                                                                                               |                 |                 |     |      |
|------------------------------|------------------------------|---------------------------|----------------------------------------------------------------------------------------------------------------------------------------------------------------------------------------|---------------------------------------------------------------------------------------------------------------|-----------------|-----------------|-----|------|
| <i>Staphylococcus aureus</i> | <i>Laurencia coronopus</i>   | Chloroform                | -                                                                                                                                                                                      | Fatty acids (free or as acylglycerols)                                                                        | 500 µg/mL       | Overnight, 37°C | -   | [34] |
|                              |                              | <i>n</i> -butanol         | -                                                                                                                                                                                      | N-containing compounds                                                                                        | 250 µg/mL       | Overnight, 37°C | -   | [34] |
|                              |                              | Aqueous                   | -                                                                                                                                                                                      | -                                                                                                             | 500 µg/mL       | Overnight, 37°C | -   | [34] |
|                              |                              | “Volatile compounds”      | -                                                                                                                                                                                      | -                                                                                                             | 500 µg/mL       | Overnight, 37°C | -   | [34] |
|                              | <i>Osmundaria serrata</i>    | Lanosol ethyl ether (LEE) | -                                                                                                                                                                                      | -                                                                                                             | 0.19±0.03 mg/mL | 37±2°C, 24h     | -   | [48] |
|                              |                              | Lanosol ethyl ether (LEE) | -                                                                                                                                                                                      | -                                                                                                             | 0.67±0.33 mg/mL | 37±2°C, 24h     | MBC | [48] |
|                              | <i>Palisada perforata</i>    | Aqueous                   | -                                                                                                                                                                                      | -                                                                                                             | 250 µg/mL       | Overnight, 37°C | -   | [34] |
|                              |                              | “Volatile compounds”      | -                                                                                                                                                                                      | -                                                                                                             | 500 µg/mL       | Overnight, 37°C | -   | [34] |
|                              | <i>Punctaria latifolia</i>   | Chloroform                | -                                                                                                                                                                                      | -                                                                                                             | 250 µg/mL       | Overnight, 37°C | -   | [34] |
|                              |                              | <i>n</i> -butanol         | Mono-, di-, and tricarboxylic acids                                                                                                                                                    | Phenolic acids and their derivatives, an ester of phosphoric acid and significant amounts of free fatty acids | 250 µg/mL       | Overnight, 37°C | -   | [34] |
|                              |                              | Aqueous                   | -                                                                                                                                                                                      | -                                                                                                             | 500 µg/mL       | Overnight, 37°C | -   | [34] |
|                              |                              | “Volatile compounds”      | Alkylated phenols, free lower fatty acids, benzoic acid, esters of acetic, formic acids, carvacrol, chlorinated hydrocarbons, sulfur containing compounds (methyl benzene sulfonamide) | -                                                                                                             | 500 µg/mL       | Overnight, 37°C | -   | [34] |
|                              | <i>Punctaria plantaginea</i> | Chloroform                | -                                                                                                                                                                                      | -                                                                                                             | 250 µg/mL       | Overnight, 37°C | -   | [34] |
|                              |                              | “Volatile compounds”      | Alkylated phenols, free lower fatty acids, benzoic acid, esters of acetic, formic acids, carvacrol, chlorinated hydrocarbons, sulfur containing compounds                              | -                                                                                                             | 500 µg/mL       | Overnight, 37°C | -   | [34] |

|                              |                               |                      |                                                                                                                                                                                        |                                                                                                               |                                     |                 |                                     |      |
|------------------------------|-------------------------------|----------------------|----------------------------------------------------------------------------------------------------------------------------------------------------------------------------------------|---------------------------------------------------------------------------------------------------------------|-------------------------------------|-----------------|-------------------------------------|------|
|                              |                               |                      | (methyl benzene sulfonamide)                                                                                                                                                           |                                                                                                               |                                     |                 |                                     |      |
| <i>Staphylococcus aureus</i> | <i>Sargassum vulgare</i>      | Methanol             | Seaweed with high content in carbohydrate                                                                                                                                              | -                                                                                                             | 250 µg/mL                           | 12h, 35°C       | -                                   | [47] |
|                              |                               | Methanol             | Seaweed with high content in carbohydrate                                                                                                                                              | -                                                                                                             | 500 µg/mL (tryptic soy agar plates) | 24h, 35°C       | MBC (minimum bactericidal activity) | [47] |
|                              | <i>Scytosiphon lomentaria</i> | Chloroform           | -                                                                                                                                                                                      | -                                                                                                             | 250 µg/mL                           | Overnight, 37°C | -                                   | [34] |
|                              |                               | <i>n</i> -butanol    | Mono-, di-, and tricarboxylic acids                                                                                                                                                    | Phenolic acids and their derivatives, an ester of phosphoric acid and significant amounts of free fatty acids | 250 µg/mL                           | Overnight, 37°C | -                                   | [34] |
|                              |                               | Aqueous              | -                                                                                                                                                                                      | -                                                                                                             | 500 µg/mL                           | Overnight, 37°C | -                                   | [34] |
|                              |                               | “Volatile compounds” | Alkylated phenols, free lower fatty acids, benzoic acid, esters of acetic, formic acids, carvacrol, chlorinated hydrocarbons, sulfur containing compounds (methyl benzene sulfonamide) | -                                                                                                             | 250 µg/mL                           | Overnight, 37°C | -                                   | [34] |
|                              | <i>Stilophora tenella</i>     | Chloroform           | -                                                                                                                                                                                      | -                                                                                                             | 500 µg/mL                           | Overnight, 37°C | -                                   | [34] |
|                              |                               | <i>n</i> -butanol    | Mono-, di-, and tricarboxylic acids                                                                                                                                                    | Phenolic acids and their derivatives, an ester of phosphoric acid and significant amounts of free fatty acids | 500 µg/mL                           | Overnight, 37°C | -                                   | [34] |
|                              |                               | Aqueous              | -                                                                                                                                                                                      | -                                                                                                             | 500 µg/mL                           | Overnight, 37°C | -                                   | [34] |
|                              | <i>Zanardinia typus</i>       | Chloroform           | -                                                                                                                                                                                      | -                                                                                                             | 125 µg/mL                           | Overnight, 37°C | -                                   | [34] |
|                              |                               | <i>n</i> -butanol    | Mono-, di-, and tricarboxylic acids                                                                                                                                                    | Phenolic acids and their derivatives, an ester of phosphoric acid and significant amounts of free fatty acids | 500 µg/mL                           | Overnight, 37°C | -                                   | [34] |

|                              |                         |                      |                                                                                                                                                                                        |   |           |                 |   |      |
|------------------------------|-------------------------|----------------------|----------------------------------------------------------------------------------------------------------------------------------------------------------------------------------------|---|-----------|-----------------|---|------|
| <i>Staphylococcus aureus</i> | <i>Zanardinia typus</i> | Aqueous              | -                                                                                                                                                                                      | - | 500 µg/mL | Overnight, 37°C | - | [34] |
|                              |                         | "Volatile compounds" | Alkylated phenols, free lower fatty acids, benzoic acid, esters of acetic, formic acids, carvacrol, chlorinated hydrocarbons, sulfur containing compounds (methyl benzene sulfonamide) | - | 500 µg/mL | Overnight, 37°C | - | [34] |

MIC defined as the lowest concentration inhibiting the visual growth of the test culture on the microplate.

MBC – minimum bactericidal activity.

**Table S5.** Detailed information of antibacterial activity reported by a spectrophotometric method.

| Spectrophotometric method* <sup>3</sup> |                                 |                                                 |                        |                                                                                                |                       |           |
|-----------------------------------------|---------------------------------|-------------------------------------------------|------------------------|------------------------------------------------------------------------------------------------|-----------------------|-----------|
| Phytopathogenic bacteria                | Macroalgae source               | Extraction solvent                              | Decrease of growth (%) | Initial bacterial concentration (determined by OD in the nutrient media TSB12 * <sup>4</sup> ) | Incubation conditions | Reference |
| <b><i>Bacillus subtilis</i></b>         | <i>Bonnemaïsonia hamifera</i>   | Dichloromethane extract (dissolved in methanol) | 20-49 %                | 0.03 (nutrient media: TSB12)                                                                   | 5h, 36°C (shaking)    | [56]      |
|                                         | <i>Callithamnion corymbosum</i> | Dichloromethane extract (dissolved in methanol) | 50-79 %                | 0.03 (nutrient media: TSB12)                                                                   | 5h, 36°C (shaking)    | [56]      |
|                                         | <i>Carradoriella elongata</i>   | Dichloromethane extract (dissolved in methanol) | 20-49 %                | 0.03 (nutrient media: TSB12)                                                                   | 5h, 36°C (shaking)    | [56]      |
|                                         | <i>Ceramium tenuicorne</i>      | Dichloromethane extract (dissolved in methanol) | 20-49 %                | 0.03 (nutrient media: TSB12)                                                                   | 5h, 36°C (shaking)    | [56]      |
|                                         | <i>Ceramium virgatum</i>        | Dichloromethane extract (dissolved in methanol) | 50-79 %                | 0.03 (nutrient media: TSB12)                                                                   | 5h, 36°C (shaking)    | [56]      |
|                                         | <i>Cladophora rupestris</i>     | Dichloromethane extract (dissolved in methanol) | 20-49 %                | 0.03 (nutrient media: TSB12)                                                                   | 5h, 36°C (shaking)    | [56]      |
|                                         | <i>Dasya baillouviana</i>       | Dichloromethane extract (dissolved in methanol) | 50-79 %                | 0.03 (nutrient media: TSB12)                                                                   | 5h, 36°C (shaking)    | [56]      |
|                                         | <i>Dumontia contorta</i>        | Dichloromethane extract (dissolved in methanol) | 20-49 %                | 0.03 (nutrient media: TSB12)                                                                   | 5h, 36°C (shaking)    | [56]      |
|                                         | <i>Fucus serratus</i>           | Dichloromethane extract (dissolved in methanol) | 50-79 %                | 0.03 (nutrient media: TSB12)                                                                   | 5h, 36°C (shaking)    | [56]      |
|                                         | <i>Fucus vesiculosus</i>        | Dichloromethane extract (dissolved in methanol) | 50-79 %                | 0.03 (nutrient media: TSB12)                                                                   | 5h, 36°C (shaking)    | [56]      |
|                                         | <i>Halosiphon tomentosus</i>    | Dichloromethane extract (dissolved in methanol) | 50-79 %                | 0.03 (nutrient media: TSB12)                                                                   | 5h, 36°C (shaking)    | [56]      |
|                                         | <i>Rhodomela confervoides</i>   | Dichloromethane extract (dissolved in methanol) | 50-79 %                | 0.03 (nutrient media: TSB12)                                                                   | 5h, 36°C (shaking)    | [56]      |
|                                         | <i>Saccharina latissima</i>     | Dichloromethane extract (dissolved in methanol) | > 80 %                 | 0.03 (nutrient media: TSB12)                                                                   | 5h, 36°C (shaking)    | [56]      |
|                                         | <i>Vertebrata nigra</i>         | Dichloromethane extract (dissolved in methanol) | > 80%                  | 0.03 (nutrient media: TSB12)                                                                   | 5h, 36°C (shaking)    | [56]      |
| <b><i>Pseudomonas aeruginosa</i></b>    | <i>Ceramium tenuicorne</i>      | Dichloromethane extract (dissolved in methanol) | 50-79 %                | 0.03 (nutrient media: TSB12)                                                                   | 5h, 36°C (shaking)    | [56]      |

\*<sup>3</sup>-Methodology described in Goecke et al., 2012 [56].

\*<sup>4</sup>-Nutrient media TSB12 prepared with 12 g/L Difco tryptic soy broth, 10 g/L NaCl, pH 7.2 in distilled water.

**Table S6.** Detailed information about antibacterial activity from field studies.

| Field Studies                                        |                                                                            |                                       |                       |                                  |        |                       |                  |           |
|------------------------------------------------------|----------------------------------------------------------------------------|---------------------------------------|-----------------------|----------------------------------|--------|-----------------------|------------------|-----------|
| Phytopathogenic Bacteria                             | Macroalgae source                                                          | Specifications of the extract         | Extract concentration | Extract application              | Host   | Disease incidence (%) | Positive control | Reference |
| <i>Ralstonia solanacearum</i>                        | Brown seaweed extracts (Shanghai Redbrillian chemical, Batch no. 20140920) | Commercial product                    | 1 g/L                 | Presoaking                       | Potato | 3.33 ± 7.9 %          | 51.7 ± 8.3 %     | [57]      |
|                                                      |                                                                            | Commercial product                    | 1 g/L                 | Spraying                         | Potato | 0 %                   | 51.7 ± 8.3 %     | [57]      |
|                                                      |                                                                            | Commercial product                    | 1 g/L                 | Presoaking+ spraying             | Potato | 0 %                   | 51.7 ± 8.3 %     | [57]      |
| <i>Xanthomonas campestris</i> pv. <i>vesicatoria</i> | <i>Ascophyllum nodosum</i> (Acadian SeaPlants Ltd., Dartmouth, NS, Canada) | Alkaline extract (Commercial product) | 0,50%                 | Spraying of plants (field grown) | Tomato | 45-50%                | 85-90%           | [58]      |
|                                                      |                                                                            | Alkaline extract (Commercial product) | 0,50%                 | Spraying of plants (field grown) | Tomato | 50-55%                | 75-80%           | [58]      |
|                                                      |                                                                            | Alkaline extract (Commercial product) | 0,50%                 | Spraying of plants (greenhouse)  | Tomato | 25-30%                | 50-55%           | [58]      |

## References

- [1] Esserti, S.; Smaili, A.; Rifai, L. A.; Koussa, T.; Makroum, K.; Belfaiza, M.; Kabil, E. M.; Faize, L.; Burgos, L.; Albuquerque, N.; et al. Protective effect of three brown seaweed extracts against fungal and bacterial diseases of tomato. *J. Appl. Phycol.*, **2017**, *29*, 1081–1093. <https://doi.org/10.1007/s10811-016-0996-z>.
- [2] Hornsey, I. S.; Hide, D. The production of antimicrobial compounds by British marine algae I. Antibiotic-producing marine algae. *Br. Phycol. J.*, **1974**, *9*, 353–361. <https://doi.org/10.1080/00071617400650421>.
- [3] Malini, M.; Ponnaniakajamdeen, M.; Malarkodi, C.; Rajeshkumar, S. Explore the Antimicrobial Potential from Organic Solvents extract of Brown Seaweed (*Sargassum longifolium*) alleviating to pharmaceuticals. *Int. J. Pharm. Res.*, **2014**, *6* (1), 28–35.
- [4] Morales, J. L.; Cantillo-Ciau, Z. O.; Sánchez-Molina, I.; Mena-Rejón, G. J. Screening of Antibacterial and Antifungal Activities of Six Marine Macroalgae from Coasts of Yucatán Peninsula. *Pharm. Biol.*, **2006**, *44* (8), 632–635. <https://doi.org/10.1080/13880200600897569>.
- [5] Freile-Pelegrín, Y.; Morales, J. L. Antibacterial activity in marine algae from the coast of Yucatan, Mexico. *Bot. Mar.*, **2004**, *47*, 140–146.
- [6] Crasta, P. J.; Raviraja, N. S.; Sridhar, K. R. Antimicrobial activity of some marine algae of southwest coast of India. *Indian J. Mar. Sci.*, **1997**, *26*, 201–205.
- [7] Sivakumar, S. M.; Safhi, M. M. Isolation and screening of bioactive principle from *Chaetomorpha antennina* against certain bacterial strains. *Saudi Pharm. J.*, **2013**, *21* (1), 119–121. <https://doi.org/10.1016/j.jsps.2012.02.003>.
- [8] Rosaline, X. D.; Sakthivelkumar, S.; Rajendran, K.; Janarthanan, S. Screening of selected marine algae from the coastal Tamil Nadu, South India for antibacterial activity. *Asian Pac. J. Trop. Biomed.*, **2012**, *2* (1), S140–S146. [https://doi.org/10.1016/S2221-1691\(12\)60145-2](https://doi.org/10.1016/S2221-1691(12)60145-2).
- [9] Febles, C. I.; Arias, A.; Hardisson, A.; López, A. S.; Gil-Rodríguez, M. C. Antimicrobial Activity of Extracts from Some Canary Species of *Phaeophyta* and *Chlorophyta*. *Phyther. Res.*, **1995**, *9*, 385–387.
- [10] Rizvi, M. A.; Shameel, M. Pharmaceutical Biology of Seaweeds from the Karachi Coast of Pakistan. *Pharm. Biol.*, **2005**, *43* (2), 97–107. <https://doi.org/10.1080/13880200590919366>.
- [11] Andriani, Y.; Syamsumir, D. F.; Yee, T. C.; Harisson, F. S.; Herng, G. M.; Abdullah, S. A.; Orosco, C. A.; Ali, A. M.; Latip, J.; Kikuzaki, H.; et al. Biological Activities of Isolated Compounds from Three Edible Malaysian Red Seaweeds, *Gracilaria Changii*, *G. Manilaensis* and *Gracilaria* sp. *Nat. Prod. Commun.*, **2016**, *11* (8), 1117–1120. <https://doi.org/10.1177/1934578X1601100822>.
- [12] Ambreen, A.; Khan, H.; Tariq, A.; Ruqgia, A.; Sultana, V.; Ara, J. Evaluation of Biochemical Component and Antimicrobial Activity of Some Seaweeds Occurring at Karachi Coast. *Pakistan J. Bot.*, **2012**, *44* (5), 1799–1803.
- [13] Narasimhan, M. K.; Pavithra, S. K.; Krishnan, V.; Chandrasekaran, M. In vitro Analysis of Antioxidant, Antimicrobial and Antiproliferative Activity of *Enteromorpha antenna*, *Enteromorpha linza* and *Gracilaria corticata* Extracts. *Jundishapur J. Nat. Pharm. Prod.*, **2013**, *8* (4), 151–159. <https://doi.org/10.17795/jjnpp-11277>.
- [14] Arulkumar, A.; Rosemary, T.; Paramasivam, S.; Rajendran, R. B. Phytochemical composition, in vitro antioxidant, antibacterial potential and GC-MS analysis of red seaweeds (*Gracilaria corticata* and *Gracilaria edulis*) from Palk Bay, India. *Biocatal. Agric. Biotechnol.*, **2018**, *15*, 63–71. <https://doi.org/10.1016/j.bcab.2018.05.008>.
- [15] Capillo, G.; Savoca, S.; Costa, R.; Sanfilippo, M.; Rizzo, C.; Giudice, A. Lo; Albergamo, A.; Rando, R.; Bartolomeu, G.; Spanò, N.; et al. New Insights into the Culture Method and Antibacterial Potential of *Gracilaria gracilis*. *Mar. Drugs*, **2018**, *16* (492), 1–21. <https://doi.org/10.3390/md16120492>.
- [16] Alam, K.; Agua, T.; Maven, H.; Taie, R.; Rao, K. S.; Burrows, I.; Huber, M. E.; Rali, T. Preliminary Screening of Seaweeds, Seagrass and Lemongrass Oil from Papua New Guinea for Antimicrobial and Antifungal Activity. *Int. J. Pharmacogn.*, **1994**, *32* (4), 396–399.

- [17] Banu, A. T.; Ramani, P. S.; M., A. Effect of seaweed coating on quality characteristics and shelf life of tomato (*Lycopersicon esculentum mill*). *Food Sci. Hum. Wellness*, **2020**. <https://doi.org/10.1016/j.fshw.2020.03.002>
- [18] Ogasawara, K.; Yamada, K.; Hatsugai, N.; Imada, C.; Nishimura, M. Hexose Oxidase-Mediated Hydrogen Peroxide as a Mechanism for the Antibacterial Activity in the Red Seaweed *Ptilophora subcostata*. *PLoS One*, **2016**, *11* (2), 1–11. <https://doi.org/10.1371/journal.pone.0149084>.
- [19] Perumal, B.; Chitra, R.; Maruthupandian, A.; Viji, M. Nutritional assessment and bioactive potential of *Sargassum polycystum* C. Agardh (Brown Seaweed). *Indian J. Geo-Marine Sci.*, **2019**, *48* (4), 492–498.
- [20] Nofal, A.; Azzazy, M.; Ayyad, S.; Abdelsalm, E.; Abousekken, M. S.; Tammam, O. Evaluation of the brown alga, *Sargassum muticum* extract as an antimicrobial and feeding additives. *Brazilian J. Biol.*, **2022**, *84*, 1–9.
- [21] Kumar, P.; Selvi, S. S.; Prabha, A. L.; Kumar, K. P.; Ganeshkumar, R. S.; Govindaraju, M. Synthesis of silver nanoparticles from *Sargassum tenerrimum* and screening phytochemicals for its antibacterial activity. *Nano Biomed. Eng.*, **2012**, *4* (1), 12–16. <https://doi.org/10.5101/nbe.v4i1.p12-16>.
- [22] Albratty, M.; Alhazmi, H. A.; Meraya, A. M.; Najmi, A.; Alam, M. S.; Rehman, Z.; Moni, S. S. Spectral analysis and Antibacterial activity of the bioactive principles of *Sargassum tenerrimum* J. Agardh collected from the Red sea, Jazan, Kingdom of Saudi Arabia. *Brazilian J. Biol.*, **2023**, *83*, 1–10.
- [23] Kumaresan, M.; Anand, K. V.; Govindaraju, K.; Tamilselvan, S.; Kumar, V. G. Seaweed *Sargassum wightii* mediated preparation of zirconia (ZrO<sub>2</sub>) nanoparticles and their antibacterial activity against gram positive and gram negative bacteria. *Microb. Pathog.*, **2018**, *124*, 311–315. <https://doi.org/10.1016/j.micpath.2018.08.060>.
- [24] Achary, A.; Muthalagu, K.; Guru, M. S. Identification of Phytochemicals from *Sargassum wightii* against *Aedes aegypti*. *Int. J. Pharm. Sci. Rev. Res.*, **2014**, *29* (1), 314–319.
- [25] Lakhdar, F.; Boujaber, N.; Oumaskour, K.; Assobhei, O.; Etahiri, S. Inhibitive Activity of 17 marine algae from the coast of El Jadida-Morocco against *Erwinia chrysanthemi*. *Int. J. Pharm. Pharm. Sci.*, **2015**, *7* (10), 376–380.
- [26] Susilo, B.; Rohim, A.; Wahyu, M. L. Serial Extraction Technique of Rich Antibacterial Compounds in *Sargassum cristaefolium* Using Different Solvents and Testing Their Activity. *Curr. Bioact. Compd.*, **2022**, *18* (3), 18–25. <https://doi.org/10.2174/1573407217666210910095732>.
- [27] Rebecca, L. J.; Dhanalakshmi, V.; Thomas, T. A comparison between the effects of three algal extracts against pathogenic bacteria. *J. Chem. Pharm. Res.*, **2012**, *4* (11), 4859–4863.
- [28] Belattmania, Z.; Reani, A.; Barakate, M.; Zrid, R.; Elatouani, S.; Hassouani, M.; Eddaoui, A.; Bentiss, F.; Sabour, B. Antimicrobial, antioxidant and alginate potentials of *Dictyopteris polypodioides* (Dictyotales, Phaeophyceae) from the Moroccan Atlantic coast. *Der Pharma Chem.*, **2016**, *8* (2), 216–226.
- [29] Eahamban, K.; Antonisamy, J. M. Preliminary Phytochemical , UV-VIS, HPLC and Anti-bacterial Studies on *Gracilaria corticata* J. Ag. *Asian Pac. J. Trop. Biomed.*, **2012**, S568–S574. [https://doi.org/10.1016/S2221-1691\(12\)60275-5](https://doi.org/10.1016/S2221-1691(12)60275-5).
- [30] Thangaraju, N.; Venkatalakshmi, R. P.; Chinnasamy, A.; Kannaiyan, P. Synthesis of silver nanoparticles and the antibacterial and anticancer activities of the crude extract of *Sargassum polycystum* C. Agardh. *Nano Biomed. Eng.*, **2012**, *4* (2), 89–94. <https://doi.org/10.5101/nbe.v3i1.p89-94>. Introduction.
- [31] Rebecca, L. J.; Dhanalakshmi, V.; Sharmila, S.; Das, M. P. Bactericidal Activity of *Stoechospermum* sp. *Res. J. Pharm. Biol. Chem. Sci. Bactericidal*, **2013**, *4* (2), 1749–1754.
- [32] Radhika, D.; Mohaideen, A. Fourier transform infrared analysis of *Ulva Lactuca* and *Gracilaria Corticata* and their effect on antibacterial activity. *Asian J. Pharm. Clin. Res.*, **2015**, *8* (2).
- [33] Bharath, B.; Pavithra, A. N.; Divya, A.; Perinbam, K. Chemical Composition of Ethanolic Extracts from some Seaweed Species of the South Indian Coastal Zone, Their Antibacterial and Membrane-Stabilizing Activity. *Russ. J. Mar. Biol.*, **2020**, *46* (5), 370–378. <https://doi.org/10.1134/S1063074020050041>.



- [34] Kamenarska, Z.; Serkedjieva, J.; Najdenski, H.; Stefanov, K.; Tsvetkova, I.; Dimitrova-Konaklieva, S.; Popov, S. Antibacterial, antiviral, and cytotoxic activities of some red and brown seaweeds from the Black Sea. *Bot. Mar.*, **2009**, *52*, 80–86. <https://doi.org/10.1515/BOT.2009.030>.
- [35] McConnell, O. J.; Fenical, W. Polyhalogenated 1-Octene-3-Ones, Antibacterial Metabolites from the Red Seaweed *Bonnemaisonia Asparagoides*. *Tetrahedron Lett.*, **1977**, *18* (22), 1851–1854.
- [36] Hornsey, I. S.; Hide, D. The Production of Antimicrobial Compounds by British Marine Algae. IV. Variation of Antimicrobial Activity with Algal Generation. *Br. Phycol. J.*, **1985**, *20*, 21–25. <https://doi.org/10.1080/00071618500650041>.
- [37] Zouaoui, B.; Ghalem, B. R. The Phenolic Contents and Antimicrobial Activities of Some Marine Algae from the Mediterranean Sea (Algeria). *Russ. J. Mar. Biol.*, **2017**, *43* (6), 491–495. <https://doi.org/10.1134/S1063074017060128>.
- [38] Devi, K. P.; Suganthi, N.; Kesika, P.; Pandian, S. K. Bioprotective properties of seaweeds: *In vitro* evaluation of antioxidant activity and antimicrobial activity against food borne bacteria in relation to polyphenolic content. *BMC Complement. Altern. Med.*, **2008**, 1–11. <https://doi.org/10.1186/1472-6882-8-38>.
- [39] Rajaboopathi, S.; Thambidurai, S. Evaluation of UPF and antibacterial activity of cotton fabric coated with colloidal seaweed extract functionalized silver nanoparticles. *J. Photochem. Photobiol. B Biol.*, **2018**, *183*, 75–87. <https://doi.org/10.1016/j.jphotobiol.2018.04.028>.
- [40] Sivagnanam, S. P.; Yin, S.; Choi, J. H.; Park, Y. B.; Woo, H. C.; Chun, B. S. Biological Properties of Fucoxanthin in Oil Recovered from Two Brown Seaweeds Using Supercritical CO<sub>2</sub> Extraction. *Mar. Drugs*, **2015**, *13*, 3422–3442. <https://doi.org/10.3390/md13063422>.
- [41] Coronado, A. S.; Dionisio-Sese, M. L. Antimicrobial property of crude ethanolic extract from *Sargassum crassifolium*. *Asian J. Microbiol. Biotechnol. Environ. Sci.*, **2014**, *16* (3), 471–474.
- [42] Kumar, K. A.; Rengasamy, R. Evaluation of Antibacterial Potential of Seaweeds Occurring along the Coast of Tamil Nadu, India against the Plant Pathogenic Bacterium *Xanthomonas oryzae* pv. *oryzae* (Ishiyama) Dye. *Bot. Mar.*, **2000**, *43*, 409–415.
- [43] Kumar, K. A.; Rengasamy, R. Antibacterial Activities of Seaweed Extracts/Fractions Obtained through a TLC Profile against the Phytopathogenic Bacterium *Xanthomonas oryzae* pv. *oryzae*. *Bot. Mar.*, **2000**, *43*, 417–421.
- [44] Arunkumar, K.; Selvapalam, N.; Rengasamy, R. The antibacterial compound sulphoglycerolipid 1-0 palmitoyl-3-0(6'-sulpho-alpha-quinovopyranosyl)-glycerol from *Sargassum wightii* Greville (Phaeophyceae). *Bot. Mar.*, **2005**, *48*, 441–445. <https://doi.org/10.1515/BM.2005.058>.
- [45] Li, Y.; Sun, S.; Pu, X.; Yang, Y.; Zhu, F.; Zhang, S.; Xu, N. Evaluation of Antimicrobial Activities of Seaweed Resources from Zhejiang Coast, China. *Sustainability*, **2018**, *10* (2158), 1–12. <https://doi.org/10.3390/su10072158>.
- [46] Jiménez, E.; Dorta, F.; Medina, C.; Ramírez, A.; Ramírez, I.; Peña-Cortés, H. Anti-Phytopathogenic Activities of Macro-Algae Extracts. *Mar. Drugs*, **2011**, *9*, 739–756. <https://doi.org/10.3390/md9050739>.
- [47] Arguelles, E. D.; Monsalud, R. G.; Sapin, A. B. Chemical Composition and *In Vitro* Antioxidant and Antibacterial Activities of *Sargassum vulgare* C. Agardh from Lobo, Batangas, Philippines. *Int. Soc. Southeast Asian Agric. Sci.*, **2019**, *25* (1), 112–122.
- [48] Barreto, M.; Meyer, J. J. M. Isolation and antimicrobial activity of a lanosol derivative from *Osmundaria serrata* (Rhodophyta) and a visual exploration of its biofilm covering. *South African J. Bot.*, **2006**, *72*, 521–528. <https://doi.org/10.1016/j.sajb.2006.01.006>.
- [49] Lopes, G.; Sousa, C.; Silva, L. R.; Pinto, E.; Andrade, P. B.; Bernardo, J.; Mouga, T.; Valentão, P. Can Phlorotannins Purified Extracts Constitute a Novel Pharmacological Alternative for

- Microbial Infections with Associated Inflammatory Conditions? *PLoS One*, **2012**, 7 (2), 1–9. <https://doi.org/10.1371/journal.pone.0031145>.
- [50] Jiang, Z.; Chen, Y.; Yao, F.; Chen, W.; Zhong, S.; Zheng, F.; Shi, G. Antioxidant, Antibacterial and Antischistosomal Activities of Extracts from *Grateloupia livida* (Harv). Yamada. *PLoS One*, **2013**, 8 (11), 1–10. <https://doi.org/10.1371/journal.pone.0080413>.
- [51] Suresh, M.; Iyapparaj, P.; Anantharaman, P. Antifouling Activity of Lipidic Metabolites Derived from *Padina tetrastromatica*. *Appl. Biochem. Biotechnol.*, **2016**, 179, 805–818. <https://doi.org/10.1007/s12010-016-2032-9>.
- [52] Prakash, S.; Ahila, N. K.; Ramkumar, V. S.; Ravindran, J.; Kannapiran, E. Antimicrofouling properties of chosen marine plants: An eco-friendly approach to restrain marine microfoulers. *Biocatal. Agric. Biotechnol.*, **2015**, 4, 114–121. <https://doi.org/10.1016/j.bcab.2014.11.002>.
- [53] Jiménez, J. T.; O’Connell, S.; Lyons, H.; Bradley, B.; Hall, M. Antioxidant, antimicrobial, and tyrosinase inhibition activities of acetone extract of *Ascophyllum nodosum*. *Chem. Pap.*, **2010**, 64 (4), 434–442. <https://doi.org/10.2478/s11696-010-0024-8>.
- [54] Santos, S. A. O.; Trindade, S. S.; Oliveira, C. S. D.; Parreira, P.; Rosa, D.; Duarte, M. F.; Ferreira, I.; Cruz, M. T.; Rego, A. M.; Abreu, M. H.; et al. Lipophilic Fraction of Cultivated *Bifurcaria bifurcata* R. Ross: Detailed Composition and In Vitro Prospection of Current Challenging Bioactive Properties. *Mar. Drugs*, **2017**, 15 (340), 1–17. <https://doi.org/10.3390/md15110340>.
- [55] Čagalj, M.; Skroza, D.; Razola-Díaz, M. del C.; Verardo, V.; Bassi, D.; Frleta, R.; Mekinić, I. G.; Tabanelli, G.; Šimat, V. Variations in the Composition, Antioxidant and Antimicrobial Activities of *Cystoseira compressa* during Seasonal Growth. *Mar. Drugs*, **2022**, 20 (64), 1–14.
- [56] Goecke, F.; Labes, A.; Wiese, J.; Imhoff, J. F. Dual effect of macroalgal extracts on growth of bacteria in Western Baltic Sea. *Rev. Biol. Mar. Oceanogr.*, **2012**, 47 (1), 75–86.
- [57] Farag, S. M. A.; Elhalag, K. M. A.; Hagag, M. H.; Khairy, A. S. M.; Ibrahim, H. M.; Saker, M. T.; Messiha, N. A. S. Potato bacterial wilt suppression and plant health improvement after application of different antioxidants. *J. Phytopathol.*, **2017**, 165, 522–537. <https://doi.org/10.1111/jph.12589>.
- [58] Ali, N.; Ramkissoo, A.; Ramsubhag, A.; Jayaraj, J. *Ascophyllum* extract application causes reduction of disease levels in field tomatoes grown in a tropical environment. *Crop Prot.*, **2016**, 83, 67–75. <https://doi.org/10.1016/j.cropro.2016.01.016>.
